# Supplementary material
Source: PubMed Central journal article supplement (PMC7412957)
Supplement: supplementary_materials_bbz082.pdf [file supplementary_materials_bbz082.pdf]

## Contents

|                                                                                                                         |    |
|-------------------------------------------------------------------------------------------------------------------------|----|
| <b>Supplementary figures</b> .....                                                                                      | 1  |
| <b>Figure S1.</b> Human miRNA-TF-gene regulatory network integrated from all the three types of regulatory motifs. .... | 1  |
| <b>Figure S2.</b> Mouse miRNA-TF-gene regulatory network integrated from all the three types of regulatory motifs. .... | 2  |
| <b>Figure S3.</b> Consensus signaling pathways between humans and mice.....                                             | 3  |
| <b>Figure S4.</b> Manually collected human cleft palate related miRNAs.....                                             | 4  |
| <b>Figure S5.</b> Manually collected mouse cleft palate related miRNAs. ....                                            | 5  |
| <b>Figure S6.</b> Comparison of motifs predicted by CoMoFinder and MotifPredictor. ....                                 | 6  |
| <b>Supplementary notes</b> .....                                                                                        | 7  |
| <b>Note S1.</b> Candidate CP-related miRNAs in humans. ....                                                             | 7  |
| <b>Note S2.</b> Candidate CP-related miRNAs in mice. ....                                                               | 10 |
| <b>Supplementary tables</b> .....                                                                                       | 13 |
| <b>Table S1.</b> Human cleft palate related genes. ....                                                                 | 13 |
| <b>Table S2.</b> Mouse cleft palate related genes.....                                                                  | 14 |
| <b>Table S3.</b> Human cleft palate related miRNA-TF-gene type I motifs. ....                                           | 15 |
| <b>Table S4.</b> Human cleft palate related miRNA-TF-gene type II motifs. ....                                          | 18 |
| <b>Table S5.</b> Human cleft palate related miRNA-TF-gene type III motifs. ....                                         | 20 |
| <b>Table S6.</b> Mouse cleft palate related miRNA-TF-gene type I motifs. ....                                           | 21 |
| <b>Table S7.</b> Mouse cleft palate related miRNA-TF-gene type II motifs.....                                           | 39 |
| <b>Table S8.</b> Mouse cleft palate related miRNA-TF-gene type III motifs.....                                          | 46 |
| <b>Table S9.</b> Pathway enrichment analysis of consensus TFs and genes in humans.....                                  | 49 |
| <b>Table S10.</b> Pathway enrichment analysis of consensus TFs and genes in mice.....                                   | 50 |
| <b>Table S11.</b> Consensus interactions for each pair within the tri-molecules between humans and mice. ....           | 51 |
| <b>Table S12.</b> List of targets of each hub TF or miRNA in humans. ....                                               | 52 |
| <b>Table S13.</b> List of targets of each hub TF or miRNA in mice. ....                                                 | 53 |
| <b>Table S14.</b> Gene Ontology term enrichment analysis of overlapped genes using DAVID online tool. .                 | 54 |
| <b>Table S15.</b> Primers for qRT-PCR.....                                                                              | 56 |

## Supplementary figures

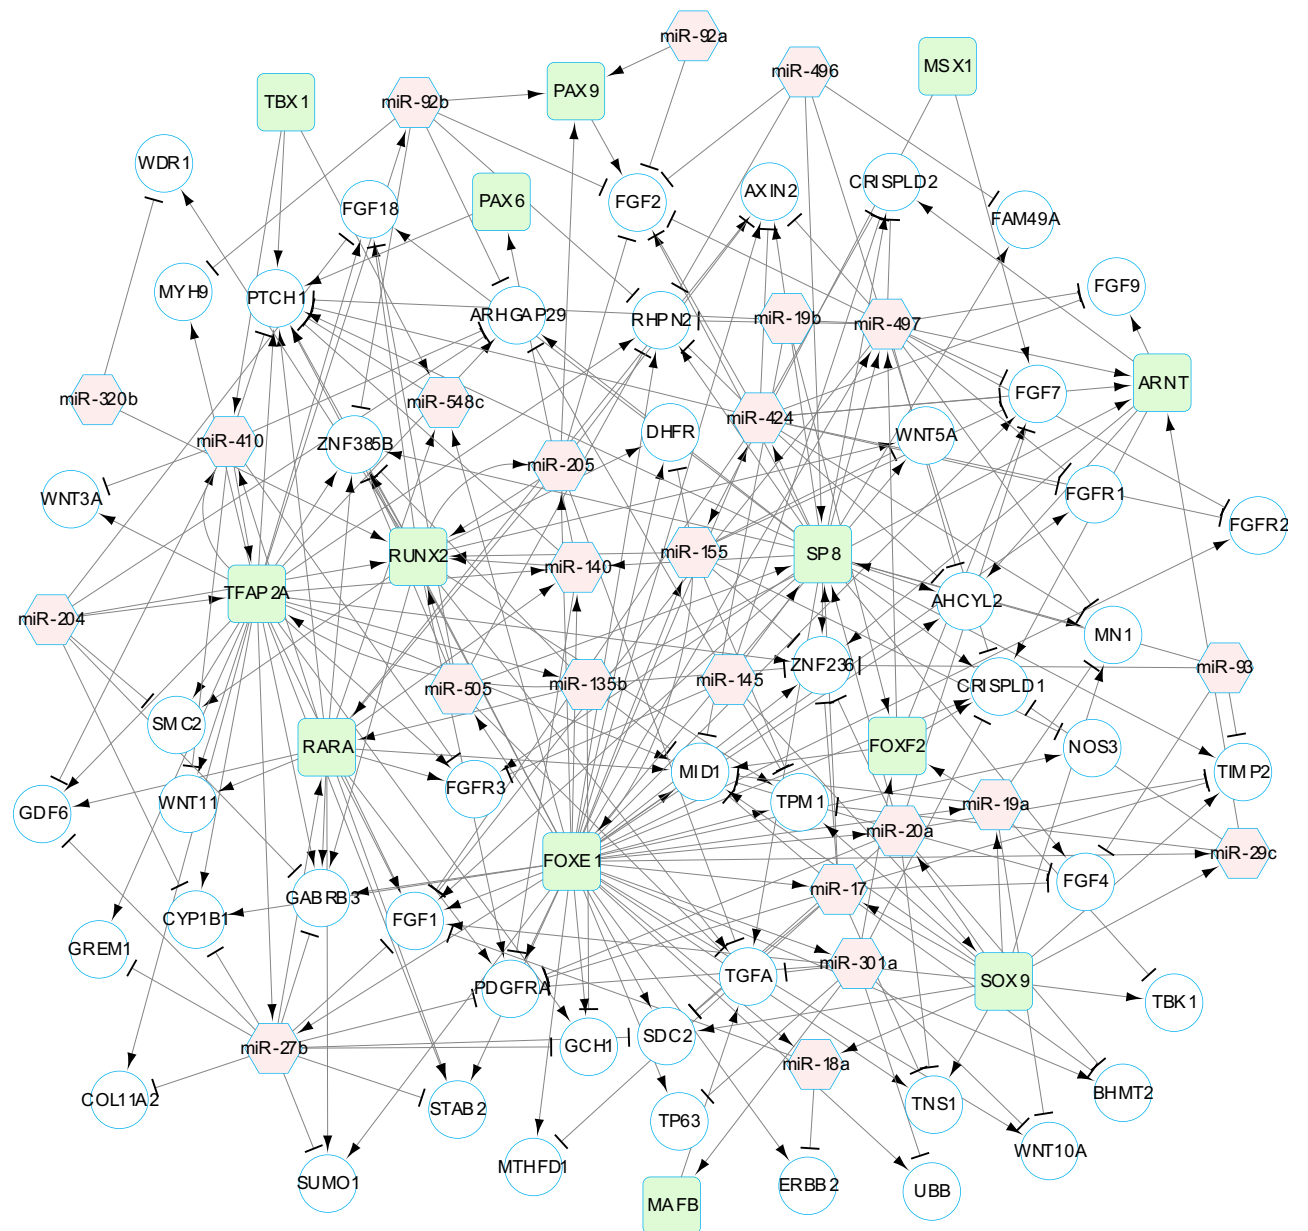

**Figure S1.** Human miRNA-TF-gene regulatory network integrated from all the three types of regulatory motifs.

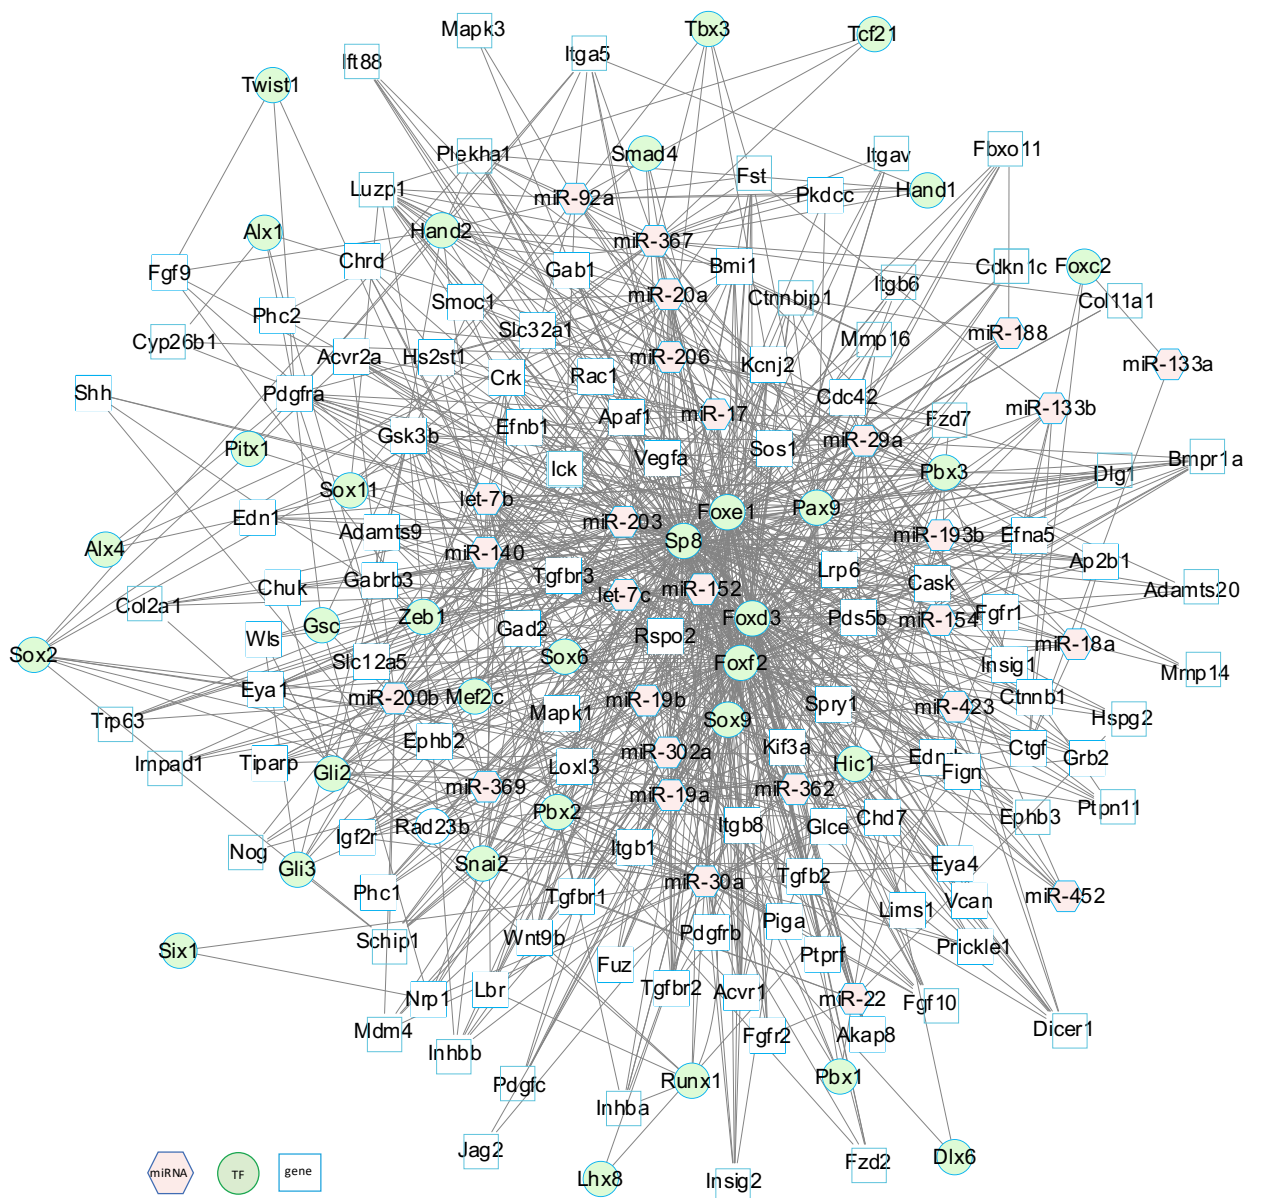

**Figure S2.** Mouse miRNA-TF-gene regulatory network integrated from all the three types of regulatory motifs.

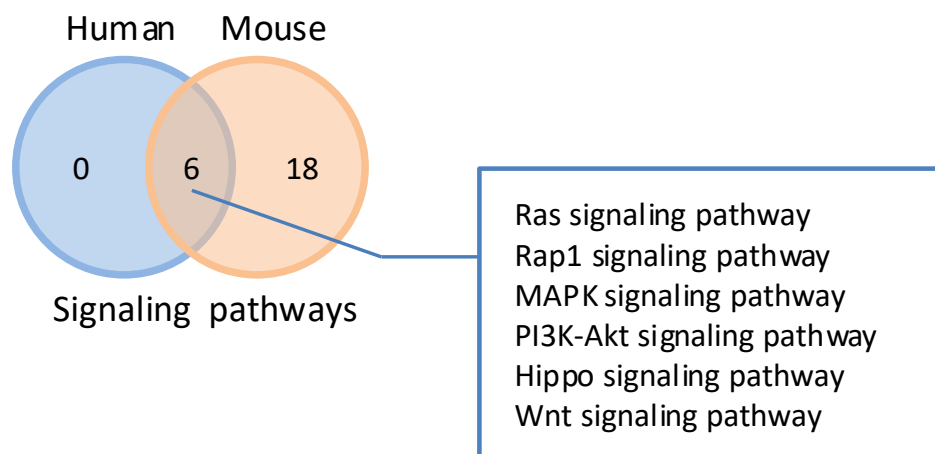

**Figure S3.** Consensus signaling pathways between humans and mice.

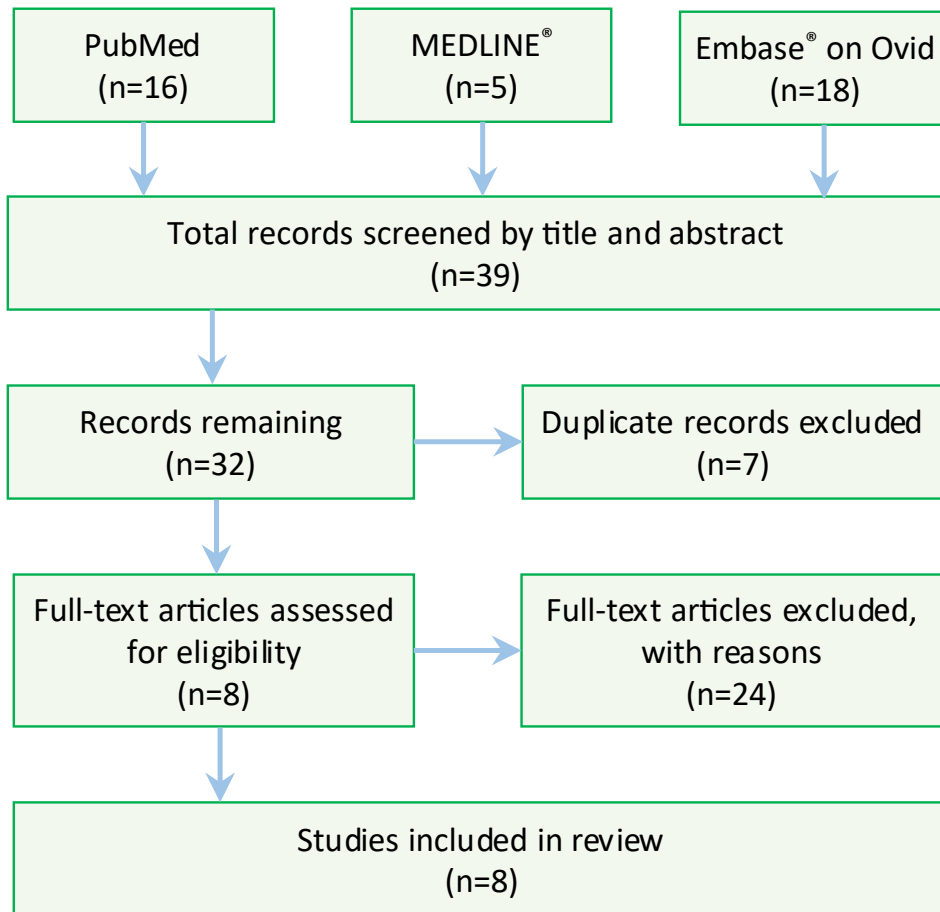

**Figure S4.** Manually collected human cleft palate related miRNAs.

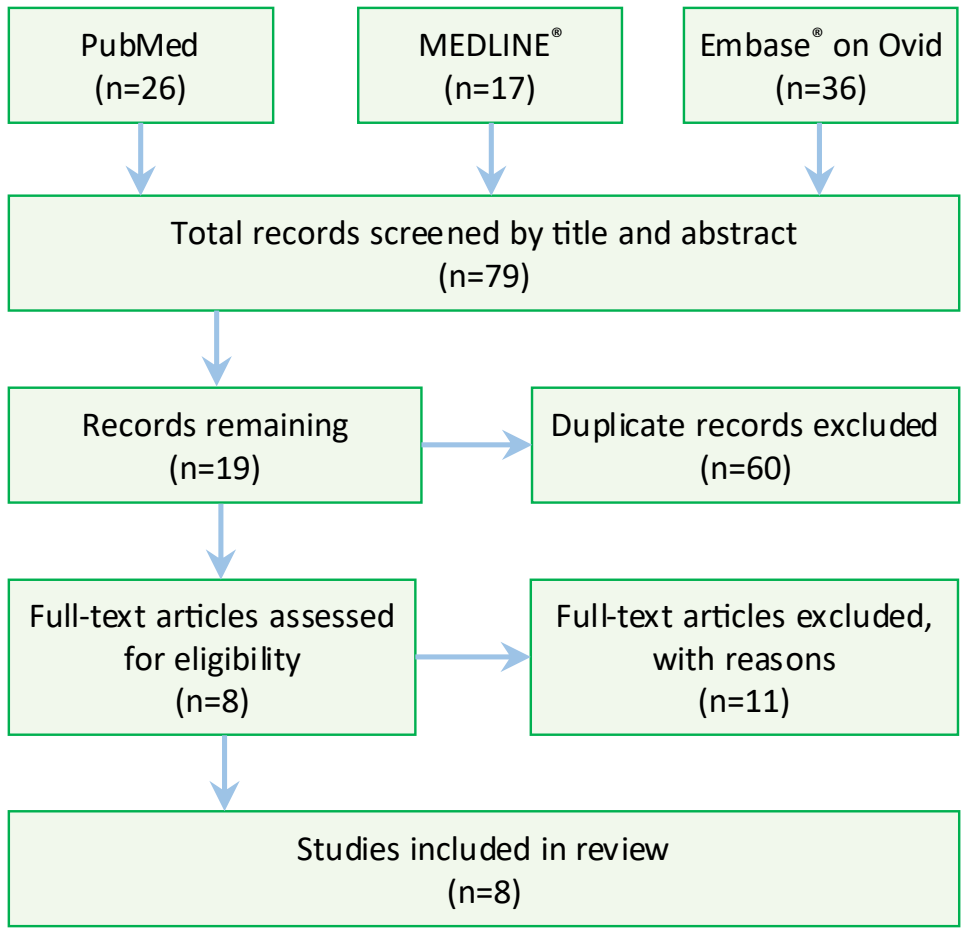

**Figure S5.** Manually collected mouse cleft palate related miRNAs.

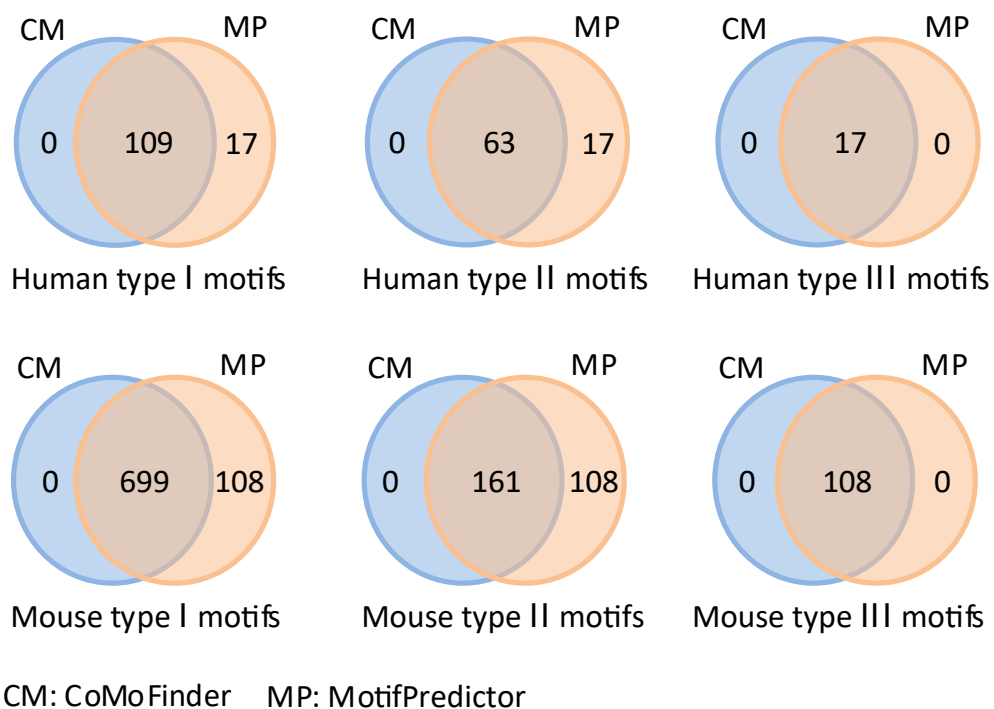

**Figure S6.** Comparison of motifs predicted by CoMoFinder and MotifPredictor. MotifPredictor is a package developed in C in this study. CoMoFinder and MotifPredictor were used to find motifs from human and mouse whole regulatory networks, respectively. The motif parameters used for CoMoFinder (getSpecificMotifs.jar) were 001101000\_012, 011001000\_012, and 011101000\_012 for types I, II, and III motifs, respectively. As shown above, the results are the same by the two methods. All the motifs predicted by CoMoFinder were found by MotifPredictor. CoMoFinder had fewer type I and II motifs than MotifPredictor. This is because types I and II were sub-motifs of type III, and CoMoFinder counted motifs, not sub-motifs.

## Supplementary notes

**Note S1.** Candidate CP-related miRNAs in humans.

| miRNA           | Description                                                                                         | Reference |
|-----------------|-----------------------------------------------------------------------------------------------------|-----------|
| hsa-miR-1260b   | Up-regulated in nonsyndromic cleft lip with or without cleft palate (NSCLP) samples versus controls | [1]       |
| hsa-miR-135-5p  | Up-regulated in non-syndromic cleft palate only patients (nsCPO) fibroblasts                        | [2]       |
| hsa-miR-135b-5p | Up-regulated in non-syndromic cleft palate only patients (nsCPO) fibroblasts                        | [2]       |
| hsa-miR-1-3p    | Down-regulated in NSCLP samples versus controls                                                     | [1]       |
| hsa-miR-140-5p  | Mutations in the 3' UTR of PDGFR $\alpha$ increasing the binding affinity of the miR-140            | [3, 4]    |
| hsa-miR-145-5p  | Down-regulated in non-syndromic cleft palate only patients (nsCPO) fibroblasts                      | [2, 5]    |
| hsa-miR-1537-3p | Down-regulated in non-syndromic cleft palate only patients (nsCPO) fibroblasts                      | [2]       |
| hsa-miR-155-3p  | Up-regulated in non-syndromic cleft palate only patients (nsCPO) fibroblasts                        | [2]       |
| hsa-miR-17-5p   | miR-17-92 deficiency results in orofacial clefting                                                  | [6, 7]    |
| hsa-miR-181a-5p | Down-regulated in non-syndromic cleft palate only patients (nsCPO) fibroblasts                      | [2]       |
| hsa-miR-187-3p  | miR-187-FGF9 interactions were associated with clefting                                             | [5]       |
| hsa-miR-18a-5p  | Up-regulated in non-syndromic cleft palate only patients (nsCPO) fibroblasts                        | [2]       |
| hsa-miR-19a-3p  | miR-17-92 deficiency results in orofacial clefting                                                  | [6]       |
| hsa-miR-19b-3p  | miR-17-92 deficiency results in orofacial clefting                                                  | [6]       |
| hsa-miR-204-5p  | Down-regulated in non-syndromic cleft palate only patients (nsCPO) fibroblasts                      | [2]       |
| hsa-miR-205-5p  | Up-regulated in NSCLP samples versus controls                                                       | [1]       |
| hsa-miR-20a-5p  | miR-17-92 deficiency results in orofacial clefting                                                  | [6]       |
| hsa-miR-24-3p   | Up-regulated in NSCLP samples versus controls                                                       | [1]       |
| hsa-miR-27b-3p  | Up-regulated in NSCLP samples versus controls                                                       | [1]       |



|                  |                                                                                                          |     |
|------------------|----------------------------------------------------------------------------------------------------------|-----|
| hsa-miR-29b-2-5p | Down-regulated in non-syndromic cleft palate only patients (nsCPO) fibroblasts                           | [2] |
| hsa-miR-29c-5p   | Down-regulated in nsCPO fibroblasts                                                                      | [2] |
| hsa-miR-301a-5p  | Up-regulated in NSCLP samples versus controls                                                            | [1] |
| hsa-miR-3182     | Down-regulated in nsCPO fibroblasts                                                                      | [2] |
| hsa-miR-320b-3p  | Down-regulated in NSCLP samples versus controls                                                          | [1] |
| hsa-miR-3649     | SNP in 3' UTR of MSX1 disturb the interaction between MSX1 and miR-3649 in the etiology of cleft palate. | [8] |
| hsa-miR-3676-5p  | Up-regulated in NSCLP samples versus controls                                                            | [1] |
| hsa-miR-380-5p   | Down-regulated in nsCPO fibroblasts                                                                      | [2] |
| hsa-miR-410-3p   | Down-regulated in nsCPO fibroblasts                                                                      | [2] |
| hsa-miR-424-3p   | Down-regulated in nsCPO fibroblasts                                                                      | [2] |
| hsa-miR-451a     | Down-regulated in nsCPO fibroblasts                                                                      | [2] |
| hsa-miR-4703-3p  | Down-regulated in NSCLP samples versus controls                                                          | [1] |
| hsa-miR-4799-3p  | Down-regulated in NSCLP samples versus controls                                                          | [1] |
| hsa-miR-496      | SNP in 3' UTR of FGF2 disturb the interaction between FGF2 and miR-496 in the etiology of cleft palate.  | [5] |
| hsa-miR-497-3p   | Down-regulated in NSCLP samples versus controls                                                          | [1] |
| hsa-miR-505-3p   | Down-regulated in non-syndromic cleft lip and palate (nsCLP) fibroblasts                                 | [2] |
| hsa-miR-548c-5p  | Down-regulated in NSCLP samples versus controls                                                          | [1] |
| hsa-miR-549a-3p  | Down-regulated in nsCPO fibroblasts                                                                      | [2] |
| hsa-miR-564      | Down-regulated in NSCLP samples versus controls                                                          | [1] |
| hsa-miR-5701     | Up-regulated in NSCLP samples versus controls                                                            | [1] |
| hsa-miR-598-3p   | Down-regulated in nsCPO fibroblasts                                                                      | [2] |
| hsa-miR-641-5p   | Down-regulated in nsCPO fibroblasts                                                                      | [2] |
| hsa-miR-720      | Up-regulated in NSCLP samples versus controls                                                            | [1] |
| hsa-miR-92a-3p   | Up-regulated in nsCPO fibroblasts                                                                        | [2] |
| hsa-miR-92b-5p   | Down-regulated in nsCPO fibroblasts                                                                      | [2] |
| hsa-miR-93-5p    | Up-regulated in nsCPO fibroblasts                                                                        | [2] |
| hsa-miR-9-5p     | Down-regulated in NSCLP samples versus controls                                                          | [1] |

## References

1. Wang S, Sun C, Meng Y, Zhang B, Wang X, Su Y, Shi L, Zhao E: **A pilot study: Screening target miRNAs in tissue of nonsyndromic cleft lip with or without cleft palate.** *Experimental and*

- Therapeutic Medicine* 2017, **13**(5):2570-2576.
2. Schoen C, Glennon JC, Abghari S, Bloemen M, Aschrafi A, Carels CE, Von den Hoff JW: **Differential microRNA expression in cultured palatal fibroblasts from infants with cleft palate and controls.** *European Journal of Orthodontics* 2017, **40**(1):90-96.
  3. Li L, Meng T, Jia Z, Zhu G, Shi B: **Single nucleotide polymorphism associated with nonsyndromic cleft palate influences the processing of miR-140.** *American Journal of Medical Genetics Part A* 2010, **152**(4):856-862.
  4. Rattanasopha S, Tongkobpetch S, Srichomthong C, Siriwan P, Suphapeetiporn K, Shotelersuk V: **PDGFRa mutations in humans with isolated cleft palate.** *European Journal of Human Genetics* 2012, **20**(10):1058.
  5. Li D, Zhang H, Ma L, Han Y, Xu M, Wang Z, Jiang H, Zhang W, Wang L, Pan Y: **Associations between microRNA binding site SNPs in FGFs and FGFRs and the risk of non-syndromic orofacial cleft.** *Scientific reports* 2016, **6**:31054.
  6. Wang J, Bai Y, Li H, Greene SB, Klysik E, Yu W, Schwartz RJ, Williams TJ, Martin JF: **MicroRNA-17-92, a direct Ap-2 $\alpha$  transcriptional target, modulates T-box factor activity in orofacial clefting.** *PLoS genetics* 2013, **9**(9):e1003785.
  7. Li J, Zou J, Li Q, Chen L, Gao Y, Yan H, Zhou B, Li J: **Assessment of differentially expressed plasma microRNAs in nonsyndromic cleft palate and nonsyndromic cleft lip with cleft palate.** *Oncotarget* 2016, **7**(52):86266.
  8. Ma L, Xu M, Li D, Han Y, Wang Z, Yuan H, Ma J, Zhang W, Jiang H, Pan Y: **A miRNA-binding-site SNP of MSX1 is Associated with NSOC Susceptibility.** *Journal of dental research* 2014, **93**(6):559-564.

**Note S2.** Candidate CP-related miRNAs in mice.

| <b>miRNA</b>    | <b>Description</b>                                                                                                                                                                                         | <b>Reference</b> |
|-----------------|------------------------------------------------------------------------------------------------------------------------------------------------------------------------------------------------------------|------------------|
| mmu-let-7b-5p   | Differentially expressed in GD-13 versus GD-12 palatal tissue                                                                                                                                              | [1]              |
| mmu-let-7c-5p   | Differentially expressed in GD-13 versus GD-12 palatal tissue                                                                                                                                              | [1]              |
| mmu-miR-133a-3p | Differentially expressed in GD-14 versus GD-12 palatal tissue                                                                                                                                              | [1]              |
| mmu-miR-133b-3p | Differentially expressed in GD-14 versus GD-12 palatal tissue                                                                                                                                              | [1]              |
| mmu-miR-140-5p  | miR-140 regulates cartilage development and homeostasis                                                                                                                                                    | [2]              |
| mmu-miR-152-3p  | Differentially expressed in GD-14 versus GD-12 palatal tissue                                                                                                                                              | [1]              |
| mmu-miR-154-5p  | Differentially expressed in GD-14 versus GD-12 palatal tissue                                                                                                                                              | [1]              |
| mmu-miR-17-5p   | miR-17-92 mutant embryos had severe craniofacial phenotypes                                                                                                                                                | [3-5]            |
| mmu-miR-188-3p  | Differentially expressed in GD-14 versus GD-13 palatal tissue                                                                                                                                              | [1]              |
| mmu-miR-18a-5p  | miR-17-92 mutant embryos had severe craniofacial phenotypes                                                                                                                                                | [3-5]            |
| mmu-miR-193a-3p | Differentially expressed in GD-13 versus GD-12 palatal tissue                                                                                                                                              | [1]              |
| mmu-miR-193b-3p | Differentially expressed in GD-13 versus GD-12 palatal tissue                                                                                                                                              | [1]              |
| mmu-miR-19a-3p  | miR-17-92 mutant embryos had severe craniofacial phenotypes                                                                                                                                                | [3-5]            |
| mmu-miR-19b-3p  | miR-17-92 mutant embryos had severe craniofacial phenotypes                                                                                                                                                | [3-5]            |
| mmu-miR-200b-3p | miR-200b plays crucial roles in cell migration and palatal fusion by regulating Zeb1 and Zeb2; miR-200b and Tgf- $\beta$ signaling are important for proper palatogenesis and especially for palate fusion | [5-7]            |
| mmu-miR-203-3p  | Differentially expressed in GD-14 versus GD-12 palatal tissue                                                                                                                                              | [1]              |

|                 |                                                                                                                                                                 |       |
|-----------------|-----------------------------------------------------------------------------------------------------------------------------------------------------------------|-------|
| mmu-miR-206-3p  | Differentially expressed in GD-14 versus GD-12 palatal tissue                                                                                                   | [1]   |
| mmu-miR-20a-5p  | miR-17-92 mutant embryos had severe craniofacial phenotypes                                                                                                     | [3-5] |
| mmu-miR-22-3p   | Differentially expressed in GD-14 versus GD-12 palatal tissue                                                                                                   | [1]   |
| mmu-miR-302a-3p | Regulate the expression of different isoforms of p63 (miR-203 and the miR-302/367 family), previously shown to be critical for both palate and lip development. | [8]   |
| mmu-miR-29a-3p  | Differentially expressed in GD-14 versus GD-12 palatal tissue                                                                                                   | [1]   |
| mmu-miR-30a-5p  | Differentially expressed in GD-14 versus GD-12 palatal tissue                                                                                                   | [1]   |
| mmu-miR-362-5p  | Differentially expressed in GD-14 versus GD-12 palatal tissue                                                                                                   | [1]   |
| mmu-miR-367-3p  | Regulate the expression of different isoforms of p63 (miR-203 and the miR-302/367 family), previously shown to be critical for both palate and lip development  | [8]   |
| mmu-miR-369-5p  | Differentially expressed in GD-14 versus GD-12 palatal tissue                                                                                                   | [1]   |
| mmu-miR-423-3p  | Differentially expressed in GD-14 versus GD-12 palatal tissue                                                                                                   | [1]   |
| mmu-miR-451a    | Differentially expressed in GD-14 versus GD-12 palatal tissue                                                                                                   | [1]   |
| mmu-miR-452-5p  | Differentially expressed in GD-14 versus GD-12 palatal tissue                                                                                                   | [1]   |
| mmu-miR-671-3p  | Differentially expressed in GD-14 versus GD-12 palatal tissue                                                                                                   | [1]   |
| mmu-miR-92a-3p  | miR-17-92 mutant embryos had severe craniofacial phenotypes                                                                                                     | [3-5] |

## References

1. Mukhopadhyay P, Brock G, Pihur V, Webb C, Pisano MM, Greene RM: **Developmental microRNA expression profiling of murine embryonic orofacial tissue.** *Birth Defects Research Part A: Clinical and Molecular Teratology* 2010, **88**(7):511-534.
2. Miyaki S, Sato T, Inoue A, Otsuki S, Ito Y, Yokoyama S, Kato Y, Takemoto F, Nakasa T, Yamashita S:

- MicroRNA-140 plays dual roles in both cartilage development and homeostasis.** *Genes & development* 2010.
3. Wang J, Bai Y, Li H, Greene SB, Klysik E, Yu W, Schwartz RJ, Williams TJ, Martin JF: **MicroRNA-17-92, a direct Ap-2 $\alpha$  transcriptional target, modulates T-box factor activity in orofacial clefting.** *PLoS genetics* 2013, **9**(9):e1003785.
  4. Cao H, Yu W, Li X, Wang J, Gao S, Holton NE, Eliason S, Sharp T, Amendt BA: **A new plasmid-based microRNA inhibitor system that inhibits microRNA families in transgenic mice and cells: a potential new therapeutic reagent.** *Gene therapy* 2016, **23**(6):527.
  5. Ries R, Yu W, Holton N, Cao H, Amendt B: **Inhibition of the miR-17-92 Cluster Separates Stages of Palatogenesis.** *Journal of dental research* 2017, **96**(11):1257-1264.
  6. Shin J-O, Nakagawa E, Kim E-J, Cho K-W, Lee J-M, Cho S-W, Jung H-S: **miR-200b regulates cell migration via Zeb family during mouse palate development.** *Histochemistry and cell biology* 2012, **137**(4):459-470.
  7. Shin J-O, Lee J-M, Cho K-W, Kwak S, Kwon H-J, Lee M-J, Cho S-W, Kim K-S, Jung H-S: **MiR-200b is involved in Tgf- $\beta$  signaling to regulate mammalian palate development.** *Histochemistry and cell biology* 2012, **137**(1):67-78.
  8. Warner DR, Mukhopadhyay P, Brock G, Webb CL, Michele Pisano M, Greene RM: **Micro RNA expression profiling of the developing murine upper lip.** *Development, growth & differentiation* 2014, **56**(6):434-447.

## Supplementary tables

**Table S1.** Human cleft palate related genes.

|                 |               |                |                 |                |
|-----------------|---------------|----------------|-----------------|----------------|
| <i>ABCA1</i>    | <i>ERBB2</i>  | <i>LEF1</i>    | <i>RARA</i>     | <i>TULP4</i>   |
| <i>ABCA4</i>    | <i>FAM49A</i> | <i>MAFB</i>    | <i>RHPN2</i>    | <i>UBB</i>     |
| <i>ABCB1</i>    | <i>FGF1</i>   | <i>MID1</i>    | <i>ROR2</i>     | <i>UGT1A7</i>  |
| <i>ADH1C</i>    | <i>FGF10</i>  | <i>MLLT3</i>   | <i>RUNX2</i>    | <i>VAX1</i>    |
| <i>AHCYL2</i>   | <i>FGF18</i>  | <i>MMP25</i>   | <i>RYK</i>      | <i>WDR1</i>    |
| <i>ALDH1L1</i>  | <i>FGF19</i>  | <i>MMP3</i>    | <i>SDC2</i>     | <i>WNT10A</i>  |
| <i>ARHGAP29</i> | <i>FGF2</i>   | <i>MN1</i>     | <i>SERPINA6</i> | <i>WNT11</i>   |
| <i>ARNT</i>     | <i>FGF3</i>   | <i>MSX1</i>    | <i>SLC19A1</i>  | <i>WNT3A</i>   |
| <i>ASL</i>      | <i>FGF4</i>   | <i>MTHFD1</i>  | <i>SLC25A13</i> | <i>WNT5A</i>   |
| <i>ASS1</i>     | <i>FGF7</i>   | <i>MTHFR</i>   | <i>SLC2A9</i>   | <i>ZNF236</i>  |
| <i>AXIN2</i>    | <i>FGF8</i>   | <i>MTR</i>     | <i>SLC6A4</i>   | <i>ZNF385B</i> |
| <i>BAALC</i>    | <i>FGF9</i>   | <i>MTRR</i>    | <i>SMC2</i>     |                |
| <i>BCL3</i>     | <i>FGFR1</i>  | <i>MYH9</i>    | <i>SP8</i>      |                |
| <i>BHMT</i>     | <i>FGFR2</i>  | <i>NAT1</i>    | <i>STAB2</i>    |                |
| <i>BHMT2</i>    | <i>FGFR3</i>  | <i>NAT2</i>    | <i>STOM</i>     |                |
| <i>BMP2</i>     | <i>FOXE1</i>  | <i>NECTIN1</i> | <i>SUMO1</i>    |                |
| <i>BMP4</i>     | <i>FOXF2</i>  | <i>NECTIN2</i> | <i>TBK1</i>     |                |
| <i>BMP7</i>     | <i>GABRB3</i> | <i>NOG</i>     | <i>TBX1</i>     |                |
| <i>BRIP1</i>    | <i>GAD1</i>   | <i>NOS3</i>    | <i>TBX22</i>    |                |
| <i>CBS</i>      | <i>GCH1</i>   | <i>NTN1</i>    | <i>TCN2</i>     |                |
| <i>CDH1</i>     | <i>GDF6</i>   | <i>PAH</i>     | <i>TCOF1</i>    |                |
| <i>COL11A2</i>  | <i>GREM1</i>  | <i>PAX3</i>    | <i>TFAP2A</i>   |                |
| <i>COL2A1</i>   | <i>GRHL3</i>  | <i>PAX6</i>    | <i>TGFA</i>     |                |
| <i>CRISPLD1</i> | <i>GSTP1</i>  | <i>PAX7</i>    | <i>TGFBI</i>    |                |
| <i>CRISPLD2</i> | <i>GSTT1</i>  | <i>PAX9</i>    | <i>TGFB3</i>    |                |
| <i>CYP1A1</i>   | <i>IRF6</i>   | <i>PCYT1A</i>  | <i>TIMP2</i>    |                |
| <i>CYP1B1</i>   | <i>IRF7</i>   | <i>PDGF-C</i>  | <i>TNS1</i>     |                |
| <i>DDC</i>      | <i>JADE1</i>  | <i>PDGFRA</i>  | <i>TP63</i>     |                |
| <i>DHFR</i>     | <i>JAG2</i>   | <i>PRSS35</i>  | <i>TPH2</i>     |                |
| <i>DVL3</i>     | <i>JARID2</i> | <i>PTCHI</i>   | <i>TPM1</i>     |                |

**Table S2.** Mouse cleft palate related genes.

|                 |               |               |                |                 |               |
|-----------------|---------------|---------------|----------------|-----------------|---------------|
| <i>Acvr1</i>    | <i>Dlx6</i>   | <i>Grb2</i>   | <i>Lhx6</i>    | <i>Phc2</i>     | <i>Snai2</i>  |
| <i>Acvr2a</i>   | <i>Dnmt3b</i> | <i>Grhl3</i>  | <i>Lhx8</i>    | <i>Piga</i>     | <i>Sos1</i>   |
| <i>Adamts20</i> | <i>Dph1</i>   | <i>Gsc</i>    | <i>Lims1</i>   | <i>Pitx1</i>    | <i>Sox11</i>  |
| <i>Adamts9</i>  | <i>Edn1</i>   | <i>Gsk3b</i>  | <i>Loxl3</i>   | <i>Pitx2</i>    | <i>Sox2</i>   |
| <i>Akap8</i>    | <i>Ednra</i>  | <i>H19</i>    | <i>Lrp6</i>    | <i>Pkdcc</i>    | <i>Sox5</i>   |
| <i>Alx1</i>     | <i>Ednrb</i>  | <i>Hand1</i>  | <i>Luzp1</i>   | <i>Plekha1</i>  | <i>Sox6</i>   |
| <i>Alx3</i>     | <i>Efna5</i>  | <i>Hand2</i>  | <i>Map3k7</i>  | <i>Prdm16</i>   | <i>Sox9</i>   |
| <i>Alx4</i>     | <i>Efnb1</i>  | <i>Hdac3</i>  | <i>Mapk1</i>   | <i>Prickle1</i> | <i>Sp8</i>    |
| <i>Ap2b1</i>    | <i>Egfr</i>   | <i>Hhat</i>   | <i>Mapk3</i>   | <i>Prrx1</i>    | <i>Spry1</i>  |
| <i>Apaf1</i>    | <i>Ephb2</i>  | <i>Hic1</i>   | <i>Mdm2</i>    | <i>Prrx2</i>    | <i>Spry2</i>  |
| <i>Arid5b</i>   | <i>Ephb3</i>  | <i>Hoxa2</i>  | <i>Mdm4</i>    | <i>Ptch1</i>    | <i>Sumo1</i>  |
| <i>Axin1</i>    | <i>Esrp1</i>  | <i>Hs2st1</i> | <i>Mef2c</i>   | <i>Ptpn11</i>   | <i>Tbx1</i>   |
| <i>Bmi1</i>     | <i>Eya1</i>   | <i>Hspg2</i>  | <i>Men1</i>    | <i>Ptprf</i>    | <i>Tbx2</i>   |
| <i>Bmp2</i>     | <i>Eya4</i>   | <i>Ick</i>    | <i>Meox2</i>   | <i>Ptprs</i>    | <i>Tbx22</i>  |
| <i>Bmp4</i>     | <i>Fbxo11</i> | <i>Ift140</i> | <i>Mmp14</i>   | <i>Pygo1</i>    | <i>Tbx3</i>   |
| <i>Bmp7</i>     | <i>Fbxw7</i>  | <i>Ift88</i>  | <i>Mmp16</i>   | <i>Pygo2</i>    | <i>Tcf21</i>  |
| <i>Bmpr1a</i>   | <i>Fgf10</i>  | <i>Igf2</i>   | <i>Mn1</i>     | <i>Rac1</i>     | <i>Tcof1</i>  |
| <i>Bnc2</i>     | <i>Fgf18</i>  | <i>Igf2r</i>  | <i>Mnt</i>     | <i>Rad23b</i>   | <i>Tfap2a</i> |
| <i>Boc</i>      | <i>Fgf8</i>   | <i>Ihh</i>    | <i>Msc</i>     | <i>Rax</i>      | <i>Tgfb1</i>  |
| <i>Cacna1s</i>  | <i>Fgf9</i>   | <i>Ilk</i>    | <i>Msx1</i>    | <i>Recq14</i>   | <i>Tgfb2</i>  |
| <i>Cask</i>     | <i>Fgfr1</i>  | <i>Impad1</i> | <i>Msx2</i>    | <i>Ror2</i>     | <i>Tgfb3</i>  |
| <i>Cdc42</i>    | <i>Fgfr2</i>  | <i>Inhba</i>  | <i>Nog</i>     | <i>Rspo2</i>    | <i>Tgfb3</i>  |
| <i>Cdkn1c</i>   | <i>Fign</i>   | <i>Inhbb</i>  | <i>Nosip</i>   | <i>Runx1</i>    | <i>Tgfb3</i>  |
| <i>Cdo1</i>     | <i>Flna</i>   | <i>Inpp5e</i> | <i>Nrp1</i>    | <i>Ryk</i>      | <i>Tgfb3</i>  |
| <i>Chd7</i>     | <i>Folr1</i>  | <i>Insig1</i> | <i>Nsd2</i>    | <i>Satb2</i>    | <i>Tiparp</i> |
| <i>Chrd</i>     | <i>Foxc2</i>  | <i>Insig2</i> | <i>Oca2</i>    | <i>Sc5d</i>     | <i>Tm7sf2</i> |
| <i>Chuk</i>     | <i>Foxd3</i>  | <i>Irf6</i>   | <i>Ofd1</i>    | <i>Schip1</i>   | <i>Trp53</i>  |
| <i>Coll1a1</i>  | <i>Foxe1</i>  | <i>Itga5</i>  | <i>Osr2</i>    | <i>Sfn</i>      | <i>Trp63</i>  |
| <i>Col2a1</i>   | <i>Foxf2</i>  | <i>Itgav</i>  | <i>Ovca2</i>   | <i>Sgpl1</i>    | <i>Tshz1</i>  |
| <i>Crk</i>      | <i>Fst</i>    | <i>Itgb1</i>  | <i>Pak1ip1</i> | <i>Shh</i>      | <i>Twist1</i> |
| <i>Csrnp1</i>   | <i>Fuz</i>    | <i>Itgb6</i>  | <i>Pax3</i>    | <i>Shox2</i>    | <i>Vangl2</i> |
| <i>Ctgf</i>     | <i>Fzd2</i>   | <i>Itgb8</i>  | <i>Pax9</i>    | <i>Sim2</i>     | <i>Vax1</i>   |
| <i>Ctnnb1</i>   | <i>Fzd7</i>   | <i>Jag2</i>   | <i>Pbx1</i>    | <i>Six1</i>     | <i>Vax2</i>   |
| <i>Ctnnbip1</i> | <i>Gab1</i>   | <i>Jmjd6</i>  | <i>Pbx2</i>    | <i>Six3</i>     | <i>Vcan</i>   |
| <i>Cyp26b1</i>  | <i>Gabrb3</i> | <i>Kat6a</i>  | <i>Pbx3</i>    | <i>Six4</i>     | <i>Vegfa</i>  |
| <i>Dher7</i>    | <i>Gad1</i>   | <i>Kcnj13</i> | <i>Pcgf2</i>   | <i>Ski</i>      | <i>Wls</i>    |
| <i>Dicer1</i>   | <i>Gad2</i>   | <i>Kcnj2</i>  | <i>Pdgfc</i>   | <i>Slc12a5</i>  | <i>Wnt5a</i>  |
| <i>Displ</i>    | <i>Gas1</i>   | <i>Kdfl</i>   | <i>Pdgfra</i>  | <i>Slc32a1</i>  | <i>Wnt9b</i>  |
| <i>Dlg1</i>     | <i>Glce</i>   | <i>Kif3a</i>  | <i>Pdgfrb</i>  | <i>Smad4</i>    | <i>Zeb1</i>   |
| <i>Dlx1</i>     | <i>Glg1</i>   | <i>Krt5</i>   | <i>Pds5a</i>   | <i>Smo</i>      | <i>Zeb2</i>   |
| <i>Dlx2</i>     | <i>Gli2</i>   | <i>Lbr</i>    | <i>Pds5b</i>   | <i>Smoc1</i>    | <i>Zfp640</i> |
| <i>Dlx5</i>     | <i>Gli3</i>   | <i>Ldb1</i>   | <i>Phc1</i>    | <i>Snai1</i>    | <i>Zfp950</i> |

**Table S3.** Human cleft palate related miRNA-TF-gene type I motifs.

| <b>TF-miRNA pair</b> | <b>miRNA-Gene pair</b>  | <b>TF-Gene pair</b> |
|----------------------|-------------------------|---------------------|
| FOXE1 ~ hsa-miR-140  | hsa-miR-140 ~ PDGFRA    | FOXE1 ~ PDGFRA      |
| FOXE1 ~ hsa-miR-140  | hsa-miR-140 ~ PTCH1     | FOXE1 ~ PTCH1       |
| FOXE1 ~ hsa-miR-155  | hsa-miR-155 ~ DHFR      | FOXE1 ~ DHFR        |
| FOXE1 ~ hsa-miR-155  | hsa-miR-155 ~ FGF7      | FOXE1 ~ FGF7        |
| FOXE1 ~ hsa-miR-155  | hsa-miR-155 ~ NOS3      | FOXE1 ~ NOS3        |
| FOXE1 ~ hsa-miR-155  | hsa-miR-155 ~ TPM1      | FOXE1 ~ TPM1        |
| FOXE1 ~ hsa-miR-155  | hsa-miR-155 ~ WNT5A     | FOXE1 ~ WNT5A       |
| FOXE1 ~ hsa-miR-155  | hsa-miR-155 ~ ZNF236    | FOXE1 ~ ZNF236      |
| FOXE1 ~ hsa-miR-17   | hsa-miR-17 ~ BHMT2      | FOXE1 ~ BHMT2       |
| FOXE1 ~ hsa-miR-17   | hsa-miR-17 ~ MID1       | FOXE1 ~ MID1        |
| FOXE1 ~ hsa-miR-17   | hsa-miR-17 ~ MTHFD1     | FOXE1 ~ MTHFD1      |
| FOXE1 ~ hsa-miR-17   | hsa-miR-17 ~ PDGFRA     | FOXE1 ~ PDGFRA      |
| FOXE1 ~ hsa-miR-17   | hsa-miR-17 ~ SDC2       | FOXE1 ~ SDC2        |
| FOXE1 ~ hsa-miR-17   | hsa-miR-17 ~ TNS1       | FOXE1 ~ TNS1        |
| FOXE1 ~ hsa-miR-17   | hsa-miR-17 ~ ZNF236     | FOXE1 ~ ZNF236      |
| FOXE1 ~ hsa-miR-18a  | hsa-miR-18a ~ ERBB2     | FOXE1 ~ ERBB2       |
| FOXE1 ~ hsa-miR-18a  | hsa-miR-18a ~ FGF1      | FOXE1 ~ FGF1        |
| FOXE1 ~ hsa-miR-19a  | hsa-miR-19a ~ MID1      | FOXE1 ~ MID1        |
| FOXE1 ~ hsa-miR-19a  | hsa-miR-19a ~ WNT10A    | FOXE1 ~ WNT10A      |
| FOXE1 ~ hsa-miR-205  | hsa-miR-205 ~ AXIN2     | FOXE1 ~ AXIN2       |
| FOXE1 ~ hsa-miR-20a  | hsa-miR-20a ~ BHMT2     | FOXE1 ~ BHMT2       |
| FOXE1 ~ hsa-miR-20a  | hsa-miR-20a ~ FGF7      | FOXE1 ~ FGF7        |
| FOXE1 ~ hsa-miR-20a  | hsa-miR-20a ~ MID1      | FOXE1 ~ MID1        |
| FOXE1 ~ hsa-miR-20a  | hsa-miR-20a ~ PDGFRA    | FOXE1 ~ PDGFRA      |
| FOXE1 ~ hsa-miR-20a  | hsa-miR-20a ~ SDC2      | FOXE1 ~ SDC2        |
| FOXE1 ~ hsa-miR-20a  | hsa-miR-20a ~ TNS1      | FOXE1 ~ TNS1        |
| FOXE1 ~ hsa-miR-20a  | hsa-miR-20a ~ ZNF236    | FOXE1 ~ ZNF236      |
| FOXE1 ~ hsa-miR-27b  | hsa-miR-27b ~ CYP1B1    | FOXE1 ~ CYP1B1      |
| FOXE1 ~ hsa-miR-27b  | hsa-miR-27b ~ FGF1      | FOXE1 ~ FGF1        |
| FOXE1 ~ hsa-miR-27b  | hsa-miR-27b ~ GABRB3    | FOXE1 ~ GABRB3      |
| FOXE1 ~ hsa-miR-27b  | hsa-miR-27b ~ GCH1      | FOXE1 ~ GCH1        |
| FOXE1 ~ hsa-miR-27b  | hsa-miR-27b ~ PDGFRA    | FOXE1 ~ PDGFRA      |
| FOXE1 ~ hsa-miR-27b  | hsa-miR-27b ~ SDC2      | FOXE1 ~ SDC2        |
| FOXE1 ~ hsa-miR-27b  | hsa-miR-27b ~ STAB2     | FOXE1 ~ STAB2       |
| FOXE1 ~ hsa-miR-27b  | hsa-miR-27b ~ SUMO1     | FOXE1 ~ SUMO1       |
| FOXE1 ~ hsa-miR-29c  | hsa-miR-29c ~ CRISPLD1  | FOXE1 ~ CRISPLD1    |
| FOXE1 ~ hsa-miR-29c  | hsa-miR-29c ~ TPM1      | FOXE1 ~ TPM1        |
| FOXE1 ~ hsa-miR-301a | hsa-miR-301a ~ CRISPLD1 | FOXE1 ~ CRISPLD1    |
| FOXE1 ~ hsa-miR-301a | hsa-miR-301a ~ PDGFRA   | FOXE1 ~ PDGFRA      |
| FOXE1 ~ hsa-miR-301a | hsa-miR-301a ~ TP63     | FOXE1 ~ TP63        |
| FOXE1 ~ hsa-miR-301a | hsa-miR-301a ~ UBB      | FOXE1 ~ UBB         |
| FOXE1 ~ hsa-miR-301a | hsa-miR-301a ~ WNT10A   | FOXE1 ~ WNT10A      |
| FOXE1 ~ hsa-miR-424  | hsa-miR-424 ~ AHCYL2    | FOXE1 ~ AHCYL2      |
| FOXE1 ~ hsa-miR-424  | hsa-miR-424 ~ AXIN2     | FOXE1 ~ AXIN2       |
| FOXE1 ~ hsa-miR-424  | hsa-miR-424 ~ FGF1      | FOXE1 ~ FGF1        |



|                      |                        |                 |
|----------------------|------------------------|-----------------|
| FOXE1 ~ hsa-miR-424  | hsa-miR-424 ~ FGF7     | FOXE1 ~ FGF7    |
| FOXE1 ~ hsa-miR-424  | hsa-miR-424 ~ FGFR1    | FOXE1 ~ FGFR1   |
| FOXE1 ~ hsa-miR-424  | hsa-miR-424 ~ FGFR2    | FOXE1 ~ FGFR2   |
| FOXE1 ~ hsa-miR-424  | hsa-miR-424 ~ PTCH1    | FOXE1 ~ PTCH1   |
| FOXE1 ~ hsa-miR-424  | hsa-miR-424 ~ RHPN2    | FOXE1 ~ RHPN2   |
| FOXE1 ~ hsa-miR-497  | hsa-miR-497 ~ AHCYL2   | FOXE1 ~ AHCYL2  |
| FOXE1 ~ hsa-miR-497  | hsa-miR-497 ~ AXIN2    | FOXE1 ~ AXIN2   |
| FOXE1 ~ hsa-miR-497  | hsa-miR-497 ~ FGF1     | FOXE1 ~ FGF1    |
| FOXE1 ~ hsa-miR-497  | hsa-miR-497 ~ FGF7     | FOXE1 ~ FGF7    |
| FOXE1 ~ hsa-miR-497  | hsa-miR-497 ~ FGFR1    | FOXE1 ~ FGFR1   |
| FOXE1 ~ hsa-miR-497  | hsa-miR-497 ~ FGFR2    | FOXE1 ~ FGFR2   |
| FOXE1 ~ hsa-miR-497  | hsa-miR-497 ~ PTCH1    | FOXE1 ~ PTCH1   |
| FOXE1 ~ hsa-miR-497  | hsa-miR-497 ~ RHPN2    | FOXE1 ~ RHPN2   |
| FOXE1 ~ hsa-miR-505  | hsa-miR-505 ~ RHPN2    | FOXE1 ~ RHPN2   |
| FOXE1 ~ hsa-miR-505  | hsa-miR-505 ~ ZNF385B  | FOXE1 ~ ZNF385B |
| FOXE1 ~ hsa-miR-548c | hsa-miR-548c ~ PTCH1   | FOXE1 ~ PTCH1   |
| FOXF2 ~ hsa-miR-497  | hsa-miR-497 ~ FGF7     | FOXF2 ~ FGF7    |
| MSX1 ~ hsa-miR-155   | hsa-miR-155 ~ FGF7     | MSX1 ~ FGF7     |
| RARA ~ hsa-miR-140   | hsa-miR-140 ~ PDGFRA   | RARA ~ PDGFRA   |
| RARA ~ hsa-miR-140   | hsa-miR-140 ~ PTCH1    | RARA ~ PTCH1    |
| RARA ~ hsa-miR-410   | hsa-miR-410 ~ FGFR3    | RARA ~ FGFR3    |
| RARA ~ hsa-miR-410   | hsa-miR-410 ~ GDF6     | RARA ~ GDF6     |
| RARA ~ hsa-miR-410   | hsa-miR-410 ~ PTCH1    | RARA ~ PTCH1    |
| RARA ~ hsa-miR-410   | hsa-miR-410 ~ WNT11    | RARA ~ WNT11    |
| RARA ~ hsa-miR-548c  | hsa-miR-548c ~ PTCH1   | RARA ~ PTCH1    |
| RUNX2 ~ hsa-miR-205  | hsa-miR-205 ~ TGFA     | RUNX2 ~ TGFA    |
| SOX9 ~ hsa-miR-17    | hsa-miR-17 ~ MID1      | SOX9 ~ MID1     |
| SOX9 ~ hsa-miR-17    | hsa-miR-17 ~ SDC2      | SOX9 ~ SDC2     |
| SOX9 ~ hsa-miR-17    | hsa-miR-17 ~ TIMP2     | SOX9 ~ TIMP2    |
| SOX9 ~ hsa-miR-17    | hsa-miR-17 ~ TNS1      | SOX9 ~ TNS1     |
| SOX9 ~ hsa-miR-18a   | hsa-miR-18a ~ FGF1     | SOX9 ~ FGF1     |
| SOX9 ~ hsa-miR-19a   | hsa-miR-19a ~ MID1     | SOX9 ~ MID1     |
| SOX9 ~ hsa-miR-19a   | hsa-miR-19a ~ MN1      | SOX9 ~ MN1      |
| SOX9 ~ hsa-miR-19a   | hsa-miR-19a ~ TBK1     | SOX9 ~ TBK1     |
| SOX9 ~ hsa-miR-20a   | hsa-miR-20a ~ MID1     | SOX9 ~ MID1     |
| SOX9 ~ hsa-miR-20a   | hsa-miR-20a ~ SDC2     | SOX9 ~ SDC2     |
| SOX9 ~ hsa-miR-20a   | hsa-miR-20a ~ TIMP2    | SOX9 ~ TIMP2    |
| SOX9 ~ hsa-miR-20a   | hsa-miR-20a ~ TNS1     | SOX9 ~ TNS1     |
| SOX9 ~ hsa-miR-29c   | hsa-miR-29c ~ TPM1     | SOX9 ~ TPM1     |
| SP8 ~ hsa-miR-140    | hsa-miR-140 ~ PTCH1    | SP8 ~ PTCH1     |
| SP8 ~ hsa-miR-424    | hsa-miR-424 ~ AHCYL2   | SP8 ~ AHCYL2    |
| SP8 ~ hsa-miR-424    | hsa-miR-424 ~ AXIN2    | SP8 ~ AXIN2     |
| SP8 ~ hsa-miR-424    | hsa-miR-424 ~ CRISPLD2 | SP8 ~ CRISPLD2  |
| SP8 ~ hsa-miR-424    | hsa-miR-424 ~ FGF1     | SP8 ~ FGF1      |
| SP8 ~ hsa-miR-424    | hsa-miR-424 ~ FGF2     | SP8 ~ FGF2      |
| SP8 ~ hsa-miR-424    | hsa-miR-424 ~ MN1      | SP8 ~ MN1       |
| SP8 ~ hsa-miR-424    | hsa-miR-424 ~ PTCH1    | SP8 ~ PTCH1     |

|                       |                        |                   |
|-----------------------|------------------------|-------------------|
| SP8 ~ hsa-miR-424     | hsa-miR-424 ~ RHPN2    | SP8 ~ RHPN2       |
| SP8 ~ hsa-miR-497     | hsa-miR-497 ~ AHCYL2   | SP8 ~ AHCYL2      |
| SP8 ~ hsa-miR-497     | hsa-miR-497 ~ AXIN2    | SP8 ~ AXIN2       |
| SP8 ~ hsa-miR-497     | hsa-miR-497 ~ CRISPLD2 | SP8 ~ CRISPLD2    |
| SP8 ~ hsa-miR-497     | hsa-miR-497 ~ FGF1     | SP8 ~ FGF1        |
| SP8 ~ hsa-miR-497     | hsa-miR-497 ~ FGF2     | SP8 ~ FGF2        |
| SP8 ~ hsa-miR-497     | hsa-miR-497 ~ MN1      | SP8 ~ MN1         |
| SP8 ~ hsa-miR-497     | hsa-miR-497 ~ PTCH1    | SP8 ~ PTCH1       |
| SP8 ~ hsa-miR-497     | hsa-miR-497 ~ RHPN2    | SP8 ~ RHPN2       |
| TBX1 ~ hsa-miR-410    | hsa-miR-410 ~ PTCH1    | TBX1 ~ PTCH1      |
| TBX1 ~ hsa-miR-548c   | hsa-miR-548c ~ PTCH1   | TBX1 ~ PTCH1      |
| TFAP2A ~ hsa-miR-135b | hsa-miR-135b ~ GCH1    | TFAP2A ~ GCH1     |
| TFAP2A ~ hsa-miR-135b | hsa-miR-135b ~ MID1    | TFAP2A ~ MID1     |
| TFAP2A ~ hsa-miR-135b | hsa-miR-135b ~ ZNF236  | TFAP2A ~ ZNF236   |
| TFAP2A ~ hsa-miR-135b | hsa-miR-135b ~ ZNF385B | TFAP2A ~ ZNF385B  |
| TFAP2A ~ hsa-miR-140  | hsa-miR-140 ~ PTCH1    | TFAP2A ~ PTCH1    |
| TFAP2A ~ hsa-miR-27b  | hsa-miR-27b ~ COL11A2  | TFAP2A ~ COL11A2  |
| TFAP2A ~ hsa-miR-27b  | hsa-miR-27b ~ CYP1B1   | TFAP2A ~ CYP1B1   |
| TFAP2A ~ hsa-miR-27b  | hsa-miR-27b ~ FGF1     | TFAP2A ~ FGF1     |
| TFAP2A ~ hsa-miR-27b  | hsa-miR-27b ~ GABRB3   | TFAP2A ~ GABRB3   |
| TFAP2A ~ hsa-miR-27b  | hsa-miR-27b ~ GCH1     | TFAP2A ~ GCH1     |
| TFAP2A ~ hsa-miR-27b  | hsa-miR-27b ~ GDF6     | TFAP2A ~ GDF6     |
| TFAP2A ~ hsa-miR-27b  | hsa-miR-27b ~ GREM1    | TFAP2A ~ GREM1    |
| TFAP2A ~ hsa-miR-27b  | hsa-miR-27b ~ STAB2    | TFAP2A ~ STAB2    |
| TFAP2A ~ hsa-miR-410  | hsa-miR-410 ~ ARHGAP29 | TFAP2A ~ ARHGAP29 |
| TFAP2A ~ hsa-miR-410  | hsa-miR-410 ~ FGFR3    | TFAP2A ~ FGFR3    |
| TFAP2A ~ hsa-miR-410  | hsa-miR-410 ~ GDF6     | TFAP2A ~ GDF6     |
| TFAP2A ~ hsa-miR-410  | hsa-miR-410 ~ PTCH1    | TFAP2A ~ PTCH1    |
| TFAP2A ~ hsa-miR-410  | hsa-miR-410 ~ WNT11    | TFAP2A ~ WNT11    |
| TFAP2A ~ hsa-miR-410  | hsa-miR-410 ~ WNT3A    | TFAP2A ~ WNT3A    |
| TFAP2A ~ hsa-miR-92b  | hsa-miR-92b ~ ARHGAP29 | TFAP2A ~ ARHGAP29 |
| TFAP2A ~ hsa-miR-92b  | hsa-miR-92b ~ MYH9     | TFAP2A ~ MYH9     |
| TFAP2A ~ hsa-miR-92b  | hsa-miR-92b ~ RHPN2    | TFAP2A ~ RHPN2    |
| TFAP2A ~ hsa-miR-92b  | hsa-miR-92b ~ ZNF385B  | TFAP2A ~ ZNF385B  |

**Table S4.** Human cleft palate related miRNA-TF-gene type II motifs.

| <b>miRNA-TF pair</b> | <b>TF-Gene pair</b> | <b>miRNA-Gene pair</b>  |
|----------------------|---------------------|-------------------------|
| hsa-miR-135b ~ ARNT  | ARNT ~ ZNF236       | hsa-miR-135b ~ ZNF236   |
| hsa-miR-29c ~ ARNT   | ARNT ~ CRISPLD1     | hsa-miR-29c ~ CRISPLD1  |
| hsa-miR-424 ~ ARNT   | ARNT ~ AHCYL2       | hsa-miR-424 ~ AHCYL2    |
| hsa-miR-424 ~ ARNT   | ARNT ~ CRISPLD2     | hsa-miR-424 ~ CRISPLD2  |
| hsa-miR-424 ~ ARNT   | ARNT ~ FGF9         | hsa-miR-424 ~ FGF9      |
| hsa-miR-497 ~ ARNT   | ARNT ~ AHCYL2       | hsa-miR-497 ~ AHCYL2    |
| hsa-miR-497 ~ ARNT   | ARNT ~ CRISPLD2     | hsa-miR-497 ~ CRISPLD2  |
| hsa-miR-497 ~ ARNT   | ARNT ~ FGF9         | hsa-miR-497 ~ FGF9      |
| hsa-miR-155 ~ FOXE1  | FOXE1 ~ DHFR        | hsa-miR-155 ~ DHFR      |
| hsa-miR-155 ~ FOXE1  | FOXE1 ~ FGF7        | hsa-miR-155 ~ FGF7      |
| hsa-miR-155 ~ FOXE1  | FOXE1 ~ NOS3        | hsa-miR-155 ~ NOS3      |
| hsa-miR-155 ~ FOXE1  | FOXE1 ~ TPM1        | hsa-miR-155 ~ TPM1      |
| hsa-miR-155 ~ FOXE1  | FOXE1 ~ WNT5A       | hsa-miR-155 ~ WNT5A     |
| hsa-miR-155 ~ FOXE1  | FOXE1 ~ ZNF236      | hsa-miR-155 ~ ZNF236    |
| hsa-miR-19a ~ FOXF2  | FOXF2 ~ MID1        | hsa-miR-19a ~ MID1      |
| hsa-miR-19b ~ FOXF2  | FOXF2 ~ MID1        | hsa-miR-19b ~ MID1      |
| hsa-miR-301a ~ FOXF2 | FOXF2 ~ CRISPLD1    | hsa-miR-301a ~ CRISPLD1 |
| hsa-miR-301a ~ MAFB  | MAFB ~ TGFA         | hsa-miR-301a ~ TGFA     |
| hsa-miR-140 ~ PAX6   | PAX6 ~ PTCH1        | hsa-miR-140 ~ PTCH1     |
| hsa-miR-205 ~ PAX9   | PAX9 ~ FGF2         | hsa-miR-205 ~ FGF2      |
| hsa-miR-92a ~ PAX9   | PAX9 ~ FGF2         | hsa-miR-92a ~ FGF2      |
| hsa-miR-92b ~ PAX9   | PAX9 ~ FGF2         | hsa-miR-92b ~ FGF2      |
| hsa-miR-135b ~ RARA  | RARA ~ MID1         | hsa-miR-135b ~ MID1     |
| hsa-miR-135b ~ RARA  | RARA ~ ZNF385B      | hsa-miR-135b ~ ZNF385B  |
| hsa-miR-205 ~ RARA   | RARA ~ AXIN2        | hsa-miR-205 ~ AXIN2     |
| hsa-miR-27b ~ RARA   | RARA ~ FGF1         | hsa-miR-27b ~ FGF1      |
| hsa-miR-27b ~ RARA   | RARA ~ GABRB3       | hsa-miR-27b ~ GABRB3    |
| hsa-miR-27b ~ RARA   | RARA ~ GDF6         | hsa-miR-27b ~ GDF6      |
| hsa-miR-27b ~ RARA   | RARA ~ PDGFRA       | hsa-miR-27b ~ PDGFRA    |
| hsa-miR-27b ~ RARA   | RARA ~ STAB2        | hsa-miR-27b ~ STAB2     |
| hsa-miR-27b ~ RARA   | RARA ~ SUMO1        | hsa-miR-27b ~ SUMO1     |
| hsa-miR-140 ~ RUNX2  | RUNX2 ~ PDGFRA      | hsa-miR-140 ~ PDGFRA    |
| hsa-miR-140 ~ RUNX2  | RUNX2 ~ PTCH1       | hsa-miR-140 ~ PTCH1     |
| hsa-miR-155 ~ RUNX2  | RUNX2 ~ DHFR        | hsa-miR-155 ~ DHFR      |
| hsa-miR-155 ~ RUNX2  | RUNX2 ~ TPM1        | hsa-miR-155 ~ TPM1      |
| hsa-miR-155 ~ RUNX2  | RUNX2 ~ WNT5A       | hsa-miR-155 ~ WNT5A     |
| hsa-miR-204 ~ RUNX2  | RUNX2 ~ FGF18       | hsa-miR-204 ~ FGF18     |
| hsa-miR-204 ~ RUNX2  | RUNX2 ~ GABRB3      | hsa-miR-204 ~ GABRB3    |
| hsa-miR-204 ~ RUNX2  | RUNX2 ~ SMC2        | hsa-miR-204 ~ SMC2      |
| hsa-miR-205 ~ RUNX2  | RUNX2 ~ TGFA        | hsa-miR-205 ~ TGFA      |
| hsa-miR-320b ~ RUNX2 | RUNX2 ~ WDR1        | hsa-miR-320b ~ WDR1     |
| hsa-miR-505 ~ RUNX2  | RUNX2 ~ FGF18       | hsa-miR-505 ~ FGF18     |
| hsa-miR-505 ~ RUNX2  | RUNX2 ~ TGFA        | hsa-miR-505 ~ TGFA      |
| hsa-miR-505 ~ RUNX2  | RUNX2 ~ ZNF385B     | hsa-miR-505 ~ ZNF385B   |
| hsa-miR-145 ~ SOX9   | SOX9 ~ TPM1         | hsa-miR-145 ~ TPM1      |

|                       |                   |                        |
|-----------------------|-------------------|------------------------|
| hsa-miR-145 ~ SP8     | SP8 ~ ARHGAP29    | hsa-miR-145 ~ ARHGAP29 |
| hsa-miR-145 ~ SP8     | SP8 ~ CRISPLD2    | hsa-miR-145 ~ CRISPLD2 |
| hsa-miR-145 ~ SP8     | SP8 ~ FGFR3       | hsa-miR-145 ~ FGFR3    |
| hsa-miR-17 ~ SP8      | SP8 ~ FGF4        | hsa-miR-17 ~ FGF4      |
| hsa-miR-17 ~ SP8      | SP8 ~ TIMP2       | hsa-miR-17 ~ TIMP2     |
| hsa-miR-17 ~ SP8      | SP8 ~ ZNF236      | hsa-miR-17 ~ ZNF236    |
| hsa-miR-20a ~ SP8     | SP8 ~ FGF4        | hsa-miR-20a ~ FGF4     |
| hsa-miR-20a ~ SP8     | SP8 ~ TIMP2       | hsa-miR-20a ~ TIMP2    |
| hsa-miR-20a ~ SP8     | SP8 ~ ZNF236      | hsa-miR-20a ~ ZNF236   |
| hsa-miR-496 ~ SP8     | SP8 ~ CRISPLD1    | hsa-miR-496 ~ CRISPLD1 |
| hsa-miR-496 ~ SP8     | SP8 ~ FAM49A      | hsa-miR-496 ~ FAM49A   |
| hsa-miR-496 ~ SP8     | SP8 ~ FGF2        | hsa-miR-496 ~ FGF2     |
| hsa-miR-496 ~ SP8     | SP8 ~ RHPN2       | hsa-miR-496 ~ RHPN2    |
| hsa-miR-505 ~ SP8     | SP8 ~ FGF18       | hsa-miR-505 ~ FGF18    |
| hsa-miR-505 ~ SP8     | SP8 ~ RHPN2       | hsa-miR-505 ~ RHPN2    |
| hsa-miR-505 ~ SP8     | SP8 ~ TGFA        | hsa-miR-505 ~ TGFA     |
| hsa-miR-505 ~ SP8     | SP8 ~ ZNF385B     | hsa-miR-505 ~ ZNF385B  |
| hsa-miR-93 ~ SP8      | SP8 ~ FGF4        | hsa-miR-93 ~ FGF4      |
| hsa-miR-93 ~ SP8      | SP8 ~ TIMP2       | hsa-miR-93 ~ TIMP2     |
| hsa-miR-93 ~ SP8      | SP8 ~ ZNF236      | hsa-miR-93 ~ ZNF236    |
| hsa-miR-135b ~ TFAP2A | TFAP2A ~ GCH1     | hsa-miR-135b ~ GCH1    |
| hsa-miR-135b ~ TFAP2A | TFAP2A ~ MID1     | hsa-miR-135b ~ MID1    |
| hsa-miR-135b ~ TFAP2A | TFAP2A ~ ZNF236   | hsa-miR-135b ~ ZNF236  |
| hsa-miR-135b ~ TFAP2A | TFAP2A ~ ZNF385B  | hsa-miR-135b ~ ZNF385B |
| hsa-miR-204 ~ TFAP2A  | TFAP2A ~ ARHGAP29 | hsa-miR-204 ~ ARHGAP29 |
| hsa-miR-204 ~ TFAP2A  | TFAP2A ~ CYP1B1   | hsa-miR-204 ~ CYP1B1   |
| hsa-miR-204 ~ TFAP2A  | TFAP2A ~ FGF18    | hsa-miR-204 ~ FGF18    |
| hsa-miR-204 ~ TFAP2A  | TFAP2A ~ GABRB3   | hsa-miR-204 ~ GABRB3   |
| hsa-miR-204 ~ TFAP2A  | TFAP2A ~ SMC2     | hsa-miR-204 ~ SMC2     |
| hsa-miR-410 ~ TFAP2A  | TFAP2A ~ ARHGAP29 | hsa-miR-410 ~ ARHGAP29 |
| hsa-miR-410 ~ TFAP2A  | TFAP2A ~ FGFR3    | hsa-miR-410 ~ FGFR3    |
| hsa-miR-410 ~ TFAP2A  | TFAP2A ~ GDF6     | hsa-miR-410 ~ GDF6     |
| hsa-miR-410 ~ TFAP2A  | TFAP2A ~ PTCH1    | hsa-miR-410 ~ PTCH1    |
| hsa-miR-410 ~ TFAP2A  | TFAP2A ~ WNT11    | hsa-miR-410 ~ WNT11    |
| hsa-miR-410 ~ TFAP2A  | TFAP2A ~ WNT3A    | hsa-miR-410 ~ WNT3A    |

**Table S5.** Human cleft palate related miRNA-TF-gene type III motifs.

| <b>miRNA-TF pair</b>  | <b>TF-Gene pair</b> | <b>miRNA-Gene pair</b> | <b>TF-miRNA pair</b>  |
|-----------------------|---------------------|------------------------|-----------------------|
| hsa-miR-155 ~ FOXE1   | FOXE1 ~ DHFR        | hsa-miR-155 ~ DHFR     | FOXE1 ~ hsa-miR-155   |
| hsa-miR-155 ~ FOXE1   | FOXE1 ~ FGF7        | hsa-miR-155 ~ FGF7     | FOXE1 ~ hsa-miR-155   |
| hsa-miR-155 ~ FOXE1   | FOXE1 ~ NOS3        | hsa-miR-155 ~ NOS3     | FOXE1 ~ hsa-miR-155   |
| hsa-miR-155 ~ FOXE1   | FOXE1 ~ TPM1        | hsa-miR-155 ~ TPM1     | FOXE1 ~ hsa-miR-155   |
| hsa-miR-155 ~ FOXE1   | FOXE1 ~ WNT5A       | hsa-miR-155 ~ WNT5A    | FOXE1 ~ hsa-miR-155   |
| hsa-miR-155 ~ FOXE1   | FOXE1 ~ ZNF236      | hsa-miR-155 ~ ZNF236   | FOXE1 ~ hsa-miR-155   |
| hsa-miR-205 ~ RUNX2   | RUNX2 ~ TGFA        | hsa-miR-205 ~ TGFA     | RUNX2 ~ hsa-miR-205   |
| hsa-miR-135b ~ TFAP2A | TFAP2A ~ GCH1       | hsa-miR-135b ~ GCH1    | TFAP2A ~ hsa-miR-135b |
| hsa-miR-135b ~ TFAP2A | TFAP2A ~ MID1       | hsa-miR-135b ~ MID1    | TFAP2A ~ hsa-miR-135b |
| hsa-miR-135b ~ TFAP2A | TFAP2A ~ ZNF236     | hsa-miR-135b ~ ZNF236  | TFAP2A ~ hsa-miR-135b |
| hsa-miR-135b ~ TFAP2A | TFAP2A ~ ZNF385B    | hsa-miR-135b ~ ZNF385B | TFAP2A ~ hsa-miR-135b |
| hsa-miR-410 ~ TFAP2A  | TFAP2A ~ ARHGAP29   | hsa-miR-410 ~ ARHGAP29 | TFAP2A ~ hsa-miR-410  |
| hsa-miR-410 ~ TFAP2A  | TFAP2A ~ FGFR3      | hsa-miR-410 ~ FGFR3    | TFAP2A ~ hsa-miR-410  |
| hsa-miR-410 ~ TFAP2A  | TFAP2A ~ GDF6       | hsa-miR-410 ~ GDF6     | TFAP2A ~ hsa-miR-410  |
| hsa-miR-410 ~ TFAP2A  | TFAP2A ~ PTCH1      | hsa-miR-410 ~ PTCH1    | TFAP2A ~ hsa-miR-410  |
| hsa-miR-410 ~ TFAP2A  | TFAP2A ~ WNT11      | hsa-miR-410 ~ WNT11    | TFAP2A ~ hsa-miR-410  |
| hsa-miR-410 ~ TFAP2A  | TFAP2A ~ WNT3A      | hsa-miR-410 ~ WNT3A    | TFAP2A ~ hsa-miR-410  |

**Table S6.** Mouse cleft palate related miRNA-TF-gene type I motifs.

| <b>TF-miRNA pair</b> | <b>miRNA-Gene pair</b> | <b>TF-Gene pair</b> |
|----------------------|------------------------|---------------------|
| Dlx6 ~ mmu-miR-30a   | mmu-miR-30a ~ Chd7     | Dlx6 ~ Chd7         |
| Foxd3 ~ mmu-let-7b   | mmu-let-7b ~ Bmpr1a    | Foxd3 ~ Bmpr1a      |
| Foxd3 ~ mmu-let-7b   | mmu-let-7b ~ Cask      | Foxd3 ~ Cask        |
| Foxd3 ~ mmu-let-7b   | mmu-let-7b ~ Chd7      | Foxd3 ~ Chd7        |
| Foxd3 ~ mmu-let-7b   | mmu-let-7b ~ Fign      | Foxd3 ~ Fign        |
| Foxd3 ~ mmu-let-7b   | mmu-let-7b ~ Piga      | Foxd3 ~ Piga        |
| Foxd3 ~ mmu-let-7b   | mmu-let-7b ~ Rspo2     | Foxd3 ~ Rspo2       |
| Foxd3 ~ mmu-let-7b   | mmu-let-7b ~ Tgfbr1    | Foxd3 ~ Tgfbr1      |
| Foxd3 ~ mmu-let-7b   | mmu-let-7b ~ Tgfbr3    | Foxd3 ~ Tgfbr3      |
| Foxd3 ~ mmu-miR-133b | mmu-miR-133b ~ Ctgf    | Foxd3 ~ Ctgf        |
| Foxd3 ~ mmu-miR-133b | mmu-miR-133b ~ Eya4    | Foxd3 ~ Eya4        |
| Foxd3 ~ mmu-miR-133b | mmu-miR-133b ~ Fgfr1   | Foxd3 ~ Fgfr1       |
| Foxd3 ~ mmu-miR-133b | mmu-miR-133b ~ Fst     | Foxd3 ~ Fst         |
| Foxd3 ~ mmu-miR-133b | mmu-miR-133b ~ Tgfbr1  | Foxd3 ~ Tgfbr1      |
| Foxd3 ~ mmu-miR-17   | mmu-miR-17 ~ Efnb1     | Foxd3 ~ Efnb1       |
| Foxd3 ~ mmu-miR-17   | mmu-miR-17 ~ Fzd7      | Foxd3 ~ Fzd7        |
| Foxd3 ~ mmu-miR-17   | mmu-miR-17 ~ Gab1      | Foxd3 ~ Gab1        |
| Foxd3 ~ mmu-miR-17   | mmu-miR-17 ~ Gad2      | Foxd3 ~ Gad2        |
| Foxd3 ~ mmu-miR-17   | mmu-miR-17 ~ Ifi88     | Foxd3 ~ Ifi88       |
| Foxd3 ~ mmu-miR-17   | mmu-miR-17 ~ Luzp1     | Foxd3 ~ Luzp1       |
| Foxd3 ~ mmu-miR-17   | mmu-miR-17 ~ Pdgfra    | Foxd3 ~ Pdgfra      |
| Foxd3 ~ mmu-miR-17   | mmu-miR-17 ~ Sos1      | Foxd3 ~ Sos1        |
| Foxd3 ~ mmu-miR-17   | mmu-miR-17 ~ Tgfbr2    | Foxd3 ~ Tgfbr2      |
| Foxd3 ~ mmu-miR-17   | mmu-miR-17 ~ Vegfa     | Foxd3 ~ Vegfa       |
| Foxd3 ~ mmu-miR-188  | mmu-miR-188 ~ Ctnnbip1 | Foxd3 ~ Ctnnbip1    |
| Foxd3 ~ mmu-miR-188  | mmu-miR-188 ~ Sos1     | Foxd3 ~ Sos1        |
| Foxd3 ~ mmu-miR-18a  | mmu-miR-18a ~ Ap2b1    | Foxd3 ~ Ap2b1       |
| Foxd3 ~ mmu-miR-18a  | mmu-miR-18a ~ Cdc42    | Foxd3 ~ Cdc42       |
| Foxd3 ~ mmu-miR-18a  | mmu-miR-18a ~ Ctgf     | Foxd3 ~ Ctgf        |
| Foxd3 ~ mmu-miR-18a  | mmu-miR-18a ~ Gab1     | Foxd3 ~ Gab1        |
| Foxd3 ~ mmu-miR-18a  | mmu-miR-18a ~ Mapk1    | Foxd3 ~ Mapk1       |
| Foxd3 ~ mmu-miR-193b | mmu-miR-193b ~ Ap2b1   | Foxd3 ~ Ap2b1       |
| Foxd3 ~ mmu-miR-193b | mmu-miR-193b ~ Dlg1    | Foxd3 ~ Dlg1        |
| Foxd3 ~ mmu-miR-193b | mmu-miR-193b ~ Kcnj2   | Foxd3 ~ Kcnj2       |
| Foxd3 ~ mmu-miR-193b | mmu-miR-193b ~ Ptpfrf  | Foxd3 ~ Ptpfrf      |
| Foxd3 ~ mmu-miR-193b | mmu-miR-193b ~ Tgfb2   | Foxd3 ~ Tgfb2       |
| Foxd3 ~ mmu-miR-193b | mmu-miR-193b ~ Tgfbr3  | Foxd3 ~ Tgfbr3      |
| Foxd3 ~ mmu-miR-19a  | mmu-miR-19a ~ Apaf1    | Foxd3 ~ Apaf1       |
| Foxd3 ~ mmu-miR-19a  | mmu-miR-19a ~ Ctgf     | Foxd3 ~ Ctgf        |
| Foxd3 ~ mmu-miR-19a  | mmu-miR-19a ~ Dicer1   | Foxd3 ~ Dicer1      |
| Foxd3 ~ mmu-miR-19a  | mmu-miR-19a ~ Dlg1     | Foxd3 ~ Dlg1        |
| Foxd3 ~ mmu-miR-19a  | mmu-miR-19a ~ Ephb3    | Foxd3 ~ Ephb3       |
| Foxd3 ~ mmu-miR-19a  | mmu-miR-19a ~ Fgf10    | Foxd3 ~ Fgf10       |
| Foxd3 ~ mmu-miR-19a  | mmu-miR-19a ~ Igf2r    | Foxd3 ~ Igf2r       |
| Foxd3 ~ mmu-miR-19a  | mmu-miR-19a ~ Kcnj2    | Foxd3 ~ Kcnj2       |

|                      |                        |                  |
|----------------------|------------------------|------------------|
| Foxd3 ~ mmu-miR-19a  | mmu-miR-19a ~ Kif3a    | Foxd3 ~ Kif3a    |
| Foxd3 ~ mmu-miR-19a  | mmu-miR-19a ~ Lrp6     | Foxd3 ~ Lrp6     |
| Foxd3 ~ mmu-miR-19a  | mmu-miR-19a ~ Mapk1    | Foxd3 ~ Mapk1    |
| Foxd3 ~ mmu-miR-19a  | mmu-miR-19a ~ Tgfbr2   | Foxd3 ~ Tgfbr2   |
| Foxd3 ~ mmu-miR-200b | mmu-miR-200b ~ Acvr2a  | Foxd3 ~ Acvr2a   |
| Foxd3 ~ mmu-miR-200b | mmu-miR-200b ~ Apaf1   | Foxd3 ~ Apaf1    |
| Foxd3 ~ mmu-miR-200b | mmu-miR-200b ~ Bmi1    | Foxd3 ~ Bmi1     |
| Foxd3 ~ mmu-miR-200b | mmu-miR-200b ~ Eya4    | Foxd3 ~ Eya4     |
| Foxd3 ~ mmu-miR-200b | mmu-miR-200b ~ Fgf10   | Foxd3 ~ Fgf10    |
| Foxd3 ~ mmu-miR-200b | mmu-miR-200b ~ Impad1  | Foxd3 ~ Impad1   |
| Foxd3 ~ mmu-miR-200b | mmu-miR-200b ~ Mdm4    | Foxd3 ~ Mdm4     |
| Foxd3 ~ mmu-miR-200b | mmu-miR-200b ~ Pdgfra  | Foxd3 ~ Pdgfra   |
| Foxd3 ~ mmu-miR-200b | mmu-miR-200b ~ Pds5b   | Foxd3 ~ Pds5b    |
| Foxd3 ~ mmu-miR-200b | mmu-miR-200b ~ Piga    | Foxd3 ~ Piga     |
| Foxd3 ~ mmu-miR-200b | mmu-miR-200b ~ Rac1    | Foxd3 ~ Rac1     |
| Foxd3 ~ mmu-miR-200b | mmu-miR-200b ~ Schip1  | Foxd3 ~ Schip1   |
| Foxd3 ~ mmu-miR-200b | mmu-miR-200b ~ Vegfa   | Foxd3 ~ Vegfa    |
| Foxd3 ~ mmu-miR-20a  | mmu-miR-20a ~ Efnb1    | Foxd3 ~ Efnb1    |
| Foxd3 ~ mmu-miR-20a  | mmu-miR-20a ~ Gab1     | Foxd3 ~ Gab1     |
| Foxd3 ~ mmu-miR-20a  | mmu-miR-20a ~ Gad2     | Foxd3 ~ Gad2     |
| Foxd3 ~ mmu-miR-20a  | mmu-miR-20a ~ Luzp1    | Foxd3 ~ Luzp1    |
| Foxd3 ~ mmu-miR-20a  | mmu-miR-20a ~ Pdgfra   | Foxd3 ~ Pdgfra   |
| Foxd3 ~ mmu-miR-20a  | mmu-miR-20a ~ Sos1     | Foxd3 ~ Sos1     |
| Foxd3 ~ mmu-miR-20a  | mmu-miR-20a ~ Tgfbr2   | Foxd3 ~ Tgfbr2   |
| Foxd3 ~ mmu-miR-20a  | mmu-miR-20a ~ Vegfa    | Foxd3 ~ Vegfa    |
| Foxd3 ~ mmu-miR-22   | mmu-miR-22 ~ Fgfr1     | Foxd3 ~ Fgfr1    |
| Foxd3 ~ mmu-miR-22   | mmu-miR-22 ~ Fgfr2     | Foxd3 ~ Fgfr2    |
| Foxd3 ~ mmu-miR-22   | mmu-miR-22 ~ Hspg2     | Foxd3 ~ Hspg2    |
| Foxd3 ~ mmu-miR-22   | mmu-miR-22 ~ Tgfbr1    | Foxd3 ~ Tgfbr1   |
| Foxd3 ~ mmu-miR-29a  | mmu-miR-29a ~ Acvr2a   | Foxd3 ~ Acvr2a   |
| Foxd3 ~ mmu-miR-29a  | mmu-miR-29a ~ Adamts20 | Foxd3 ~ Adamts20 |
| Foxd3 ~ mmu-miR-29a  | mmu-miR-29a ~ Adamts9  | Foxd3 ~ Adamts9  |
| Foxd3 ~ mmu-miR-29a  | mmu-miR-29a ~ Bmpr1a   | Foxd3 ~ Bmpr1a   |
| Foxd3 ~ mmu-miR-29a  | mmu-miR-29a ~ Cdc42    | Foxd3 ~ Cdc42    |
| Foxd3 ~ mmu-miR-29a  | mmu-miR-29a ~ Ctnnb1   | Foxd3 ~ Ctnnb1   |
| Foxd3 ~ mmu-miR-29a  | mmu-miR-29a ~ Ctnnbip1 | Foxd3 ~ Ctnnbip1 |
| Foxd3 ~ mmu-miR-29a  | mmu-miR-29a ~ Dicer1   | Foxd3 ~ Dicer1   |
| Foxd3 ~ mmu-miR-29a  | mmu-miR-29a ~ Efna5    | Foxd3 ~ Efna5    |
| Foxd3 ~ mmu-miR-29a  | mmu-miR-29a ~ Ephb3    | Foxd3 ~ Ephb3    |
| Foxd3 ~ mmu-miR-29a  | mmu-miR-29a ~ Fign     | Foxd3 ~ Fign     |
| Foxd3 ~ mmu-miR-29a  | mmu-miR-29a ~ Gab1     | Foxd3 ~ Gab1     |
| Foxd3 ~ mmu-miR-29a  | mmu-miR-29a ~ Gsk3b    | Foxd3 ~ Gsk3b    |
| Foxd3 ~ mmu-miR-29a  | mmu-miR-29a ~ Itgb1    | Foxd3 ~ Itgb1    |
| Foxd3 ~ mmu-miR-29a  | mmu-miR-29a ~ Lims1    | Foxd3 ~ Lims1    |
| Foxd3 ~ mmu-miR-29a  | mmu-miR-29a ~ Luzp1    | Foxd3 ~ Luzp1    |
| Foxd3 ~ mmu-miR-29a  | mmu-miR-29a ~ Pdgfc    | Foxd3 ~ Pdgfc    |
| Foxd3 ~ mmu-miR-29a  | mmu-miR-29a ~ Pdgfrb   | Foxd3 ~ Pdgfrb   |

|                      |                        |                  |
|----------------------|------------------------|------------------|
| Foxd3 ~ mmu-miR-29a  | mmu-miR-29a ~ Phc1     | Foxd3 ~ Phc1     |
| Foxd3 ~ mmu-miR-29a  | mmu-miR-29a ~ Plekha1  | Foxd3 ~ Plekha1  |
| Foxd3 ~ mmu-miR-29a  | mmu-miR-29a ~ Ptpn11   | Foxd3 ~ Ptpn11   |
| Foxd3 ~ mmu-miR-29a  | mmu-miR-29a ~ Schip1   | Foxd3 ~ Schip1   |
| Foxd3 ~ mmu-miR-29a  | mmu-miR-29a ~ Spry1    | Foxd3 ~ Spry1    |
| Foxd3 ~ mmu-miR-29a  | mmu-miR-29a ~ Tgfb2    | Foxd3 ~ Tgfb2    |
| Foxd3 ~ mmu-miR-29a  | mmu-miR-29a ~ Vegfa    | Foxd3 ~ Vegfa    |
| Foxd3 ~ mmu-miR-302a | mmu-miR-302a ~ Adamts9 | Foxd3 ~ Adamts9  |
| Foxd3 ~ mmu-miR-302a | mmu-miR-302a ~ Ednrb   | Foxd3 ~ Ednrb    |
| Foxd3 ~ mmu-miR-302a | mmu-miR-302a ~ Fgf10   | Foxd3 ~ Fgf10    |
| Foxd3 ~ mmu-miR-302a | mmu-miR-302a ~ Gad2    | Foxd3 ~ Gad2     |
| Foxd3 ~ mmu-miR-302a | mmu-miR-302a ~ Gsk3b   | Foxd3 ~ Gsk3b    |
| Foxd3 ~ mmu-miR-302a | mmu-miR-302a ~ Rad23b  | Foxd3 ~ Rad23b   |
| Foxd3 ~ mmu-miR-302a | mmu-miR-302a ~ Tgfbr1  | Foxd3 ~ Tgfbr1   |
| Foxd3 ~ mmu-miR-302a | mmu-miR-302a ~ Tgfbr2  | Foxd3 ~ Tgfbr2   |
| Foxd3 ~ mmu-miR-302a | mmu-miR-302a ~ Tiparp  | Foxd3 ~ Tiparp   |
| Foxd3 ~ mmu-miR-302a | mmu-miR-302a ~ Vegfa   | Foxd3 ~ Vegfa    |
| Foxd3 ~ mmu-miR-30a  | mmu-miR-30a ~ Acvr1    | Foxd3 ~ Acvr1    |
| Foxd3 ~ mmu-miR-30a  | mmu-miR-30a ~ Adamts9  | Foxd3 ~ Adamts9  |
| Foxd3 ~ mmu-miR-30a  | mmu-miR-30a ~ Apaf1    | Foxd3 ~ Apaf1    |
| Foxd3 ~ mmu-miR-30a  | mmu-miR-30a ~ Chd7     | Foxd3 ~ Chd7     |
| Foxd3 ~ mmu-miR-30a  | mmu-miR-30a ~ Ednrb    | Foxd3 ~ Ednrb    |
| Foxd3 ~ mmu-miR-30a  | mmu-miR-30a ~ Ephb2    | Foxd3 ~ Ephb2    |
| Foxd3 ~ mmu-miR-30a  | mmu-miR-30a ~ Eya1     | Foxd3 ~ Eya1     |
| Foxd3 ~ mmu-miR-30a  | mmu-miR-30a ~ Eya4     | Foxd3 ~ Eya4     |
| Foxd3 ~ mmu-miR-30a  | mmu-miR-30a ~ Fgf10    | Foxd3 ~ Fgf10    |
| Foxd3 ~ mmu-miR-30a  | mmu-miR-30a ~ Fign     | Foxd3 ~ Fign     |
| Foxd3 ~ mmu-miR-30a  | mmu-miR-30a ~ Fst      | Foxd3 ~ Fst      |
| Foxd3 ~ mmu-miR-30a  | mmu-miR-30a ~ Fzd2     | Foxd3 ~ Fzd2     |
| Foxd3 ~ mmu-miR-30a  | mmu-miR-30a ~ Fzd7     | Foxd3 ~ Fzd7     |
| Foxd3 ~ mmu-miR-30a  | mmu-miR-30a ~ Glce     | Foxd3 ~ Glce     |
| Foxd3 ~ mmu-miR-30a  | mmu-miR-30a ~ Igf2r    | Foxd3 ~ Igf2r    |
| Foxd3 ~ mmu-miR-30a  | mmu-miR-30a ~ Inhba    | Foxd3 ~ Inhba    |
| Foxd3 ~ mmu-miR-30a  | mmu-miR-30a ~ Insig2   | Foxd3 ~ Insig2   |
| Foxd3 ~ mmu-miR-30a  | mmu-miR-30a ~ Kif3a    | Foxd3 ~ Kif3a    |
| Foxd3 ~ mmu-miR-30a  | mmu-miR-30a ~ Mdm4     | Foxd3 ~ Mdm4     |
| Foxd3 ~ mmu-miR-30a  | mmu-miR-30a ~ Pds5b    | Foxd3 ~ Pds5b    |
| Foxd3 ~ mmu-miR-30a  | mmu-miR-30a ~ Piga     | Foxd3 ~ Piga     |
| Foxd3 ~ mmu-miR-30a  | mmu-miR-30a ~ Prickle1 | Foxd3 ~ Prickle1 |
| Foxd3 ~ mmu-miR-30a  | mmu-miR-30a ~ Rad23b   | Foxd3 ~ Rad23b   |
| Foxd3 ~ mmu-miR-30a  | mmu-miR-30a ~ Sos1     | Foxd3 ~ Sos1     |
| Foxd3 ~ mmu-miR-362  | mmu-miR-362 ~ Acvr1    | Foxd3 ~ Acvr1    |
| Foxd3 ~ mmu-miR-362  | mmu-miR-362 ~ Adamts9  | Foxd3 ~ Adamts9  |
| Foxd3 ~ mmu-miR-362  | mmu-miR-362 ~ Akap8    | Foxd3 ~ Akap8    |
| Foxd3 ~ mmu-miR-362  | mmu-miR-362 ~ Cask     | Foxd3 ~ Cask     |
| Foxd3 ~ mmu-miR-362  | mmu-miR-362 ~ Chd7     | Foxd3 ~ Chd7     |
| Foxd3 ~ mmu-miR-362  | mmu-miR-362 ~ Ednrb    | Foxd3 ~ Ednrb    |



|                      |                        |                  |
|----------------------|------------------------|------------------|
| Foxd3 ~ mmu-miR-362  | mmu-miR-362 ~ Eya1     | Foxd3 ~ Eya1     |
| Foxd3 ~ mmu-miR-362  | mmu-miR-362 ~ Gad2     | Foxd3 ~ Gad2     |
| Foxd3 ~ mmu-miR-362  | mmu-miR-362 ~ Grb2     | Foxd3 ~ Grb2     |
| Foxd3 ~ mmu-miR-362  | mmu-miR-362 ~ Gsk3b    | Foxd3 ~ Gsk3b    |
| Foxd3 ~ mmu-miR-362  | mmu-miR-362 ~ Insig2   | Foxd3 ~ Insig2   |
| Foxd3 ~ mmu-miR-367  | mmu-miR-367 ~ Cask     | Foxd3 ~ Cask     |
| Foxd3 ~ mmu-miR-367  | mmu-miR-367 ~ Cdkn1c   | Foxd3 ~ Cdkn1c   |
| Foxd3 ~ mmu-miR-367  | mmu-miR-367 ~ Fst      | Foxd3 ~ Fst      |
| Foxd3 ~ mmu-miR-367  | mmu-miR-367 ~ Ick      | Foxd3 ~ Ick      |
| Foxd3 ~ mmu-miR-367  | mmu-miR-367 ~ Itgav    | Foxd3 ~ Itgav    |
| Foxd3 ~ mmu-miR-367  | mmu-miR-367 ~ Luzp1    | Foxd3 ~ Luzp1    |
| Foxd3 ~ mmu-miR-367  | mmu-miR-367 ~ Pds5b    | Foxd3 ~ Pds5b    |
| Foxd3 ~ mmu-miR-367  | mmu-miR-367 ~ Plekha1  | Foxd3 ~ Plekha1  |
| Foxd3 ~ mmu-miR-367  | mmu-miR-367 ~ Slc12a5  | Foxd3 ~ Slc12a5  |
| Foxd3 ~ mmu-miR-369  | mmu-miR-369 ~ Cask     | Foxd3 ~ Cask     |
| Foxd3 ~ mmu-miR-369  | mmu-miR-369 ~ Eya1     | Foxd3 ~ Eya1     |
| Foxd3 ~ mmu-miR-369  | mmu-miR-369 ~ Gabrb3   | Foxd3 ~ Gabrb3   |
| Foxd3 ~ mmu-miR-369  | mmu-miR-369 ~ Gsk3b    | Foxd3 ~ Gsk3b    |
| Foxd3 ~ mmu-miR-423  | mmu-miR-423 ~ Fuz      | Foxd3 ~ Fuz      |
| Foxd3 ~ mmu-miR-452  | mmu-miR-452 ~ Ephb3    | Foxd3 ~ Ephb3    |
| Foxd3 ~ mmu-miR-452  | mmu-miR-452 ~ Lrp6     | Foxd3 ~ Lrp6     |
| Foxe1 ~ mmu-let-7b   | mmu-let-7b ~ Bmpr1a    | Foxe1 ~ Bmpr1a   |
| Foxe1 ~ mmu-let-7b   | mmu-let-7b ~ Cask      | Foxe1 ~ Cask     |
| Foxe1 ~ mmu-let-7b   | mmu-let-7b ~ Chd7      | Foxe1 ~ Chd7     |
| Foxe1 ~ mmu-let-7b   | mmu-let-7b ~ Fign      | Foxe1 ~ Fign     |
| Foxe1 ~ mmu-let-7b   | mmu-let-7b ~ Piga      | Foxe1 ~ Piga     |
| Foxe1 ~ mmu-let-7b   | mmu-let-7b ~ Rspo2     | Foxe1 ~ Rspo2    |
| Foxe1 ~ mmu-let-7b   | mmu-let-7b ~ Tgfbr1    | Foxe1 ~ Tgfbr1   |
| Foxe1 ~ mmu-let-7b   | mmu-let-7b ~ Tgfbr3    | Foxe1 ~ Tgfbr3   |
| Foxe1 ~ mmu-miR-133b | mmu-miR-133b ~ Ctgf    | Foxe1 ~ Ctgf     |
| Foxe1 ~ mmu-miR-133b | mmu-miR-133b ~ Eya4    | Foxe1 ~ Eya4     |
| Foxe1 ~ mmu-miR-133b | mmu-miR-133b ~ Fgfr1   | Foxe1 ~ Fgfr1    |
| Foxe1 ~ mmu-miR-133b | mmu-miR-133b ~ Fst     | Foxe1 ~ Fst      |
| Foxe1 ~ mmu-miR-133b | mmu-miR-133b ~ Tgfbr1  | Foxe1 ~ Tgfbr1   |
| Foxe1 ~ mmu-miR-17   | mmu-miR-17 ~ Efnb1     | Foxe1 ~ Efnb1    |
| Foxe1 ~ mmu-miR-17   | mmu-miR-17 ~ Fzd7      | Foxe1 ~ Fzd7     |
| Foxe1 ~ mmu-miR-17   | mmu-miR-17 ~ Gab1      | Foxe1 ~ Gab1     |
| Foxe1 ~ mmu-miR-17   | mmu-miR-17 ~ Gad2      | Foxe1 ~ Gad2     |
| Foxe1 ~ mmu-miR-17   | mmu-miR-17 ~ Ift88     | Foxe1 ~ Ift88    |
| Foxe1 ~ mmu-miR-17   | mmu-miR-17 ~ Luzp1     | Foxe1 ~ Luzp1    |
| Foxe1 ~ mmu-miR-17   | mmu-miR-17 ~ Pdgra     | Foxe1 ~ Pdgra    |
| Foxe1 ~ mmu-miR-17   | mmu-miR-17 ~ Sos1      | Foxe1 ~ Sos1     |
| Foxe1 ~ mmu-miR-17   | mmu-miR-17 ~ Tgfbr2    | Foxe1 ~ Tgfbr2   |
| Foxe1 ~ mmu-miR-17   | mmu-miR-17 ~ Vegfa     | Foxe1 ~ Vegfa    |
| Foxe1 ~ mmu-miR-188  | mmu-miR-188 ~ Ctnnbip1 | Foxe1 ~ Ctnnbip1 |
| Foxe1 ~ mmu-miR-188  | mmu-miR-188 ~ Sos1     | Foxe1 ~ Sos1     |
| Foxe1 ~ mmu-miR-18a  | mmu-miR-18a ~ Ap2b1    | Foxe1 ~ Ap2b1    |

|                      |                       |                |
|----------------------|-----------------------|----------------|
| Foxe1 ~ mmu-miR-18a  | mmu-miR-18a ~ Cdc42   | Foxe1 ~ Cdc42  |
| Foxe1 ~ mmu-miR-18a  | mmu-miR-18a ~ Ctgf    | Foxe1 ~ Ctgf   |
| Foxe1 ~ mmu-miR-18a  | mmu-miR-18a ~ Gab1    | Foxe1 ~ Gab1   |
| Foxe1 ~ mmu-miR-18a  | mmu-miR-18a ~ Mapk1   | Foxe1 ~ Mapk1  |
| Foxe1 ~ mmu-miR-193b | mmu-miR-193b ~ Ap2b1  | Foxe1 ~ Ap2b1  |
| Foxe1 ~ mmu-miR-193b | mmu-miR-193b ~ Dlg1   | Foxe1 ~ Dlg1   |
| Foxe1 ~ mmu-miR-193b | mmu-miR-193b ~ Kcnj2  | Foxe1 ~ Kcnj2  |
| Foxe1 ~ mmu-miR-193b | mmu-miR-193b ~ Ptpfrf | Foxe1 ~ Ptpfrf |
| Foxe1 ~ mmu-miR-193b | mmu-miR-193b ~ Tgfb2  | Foxe1 ~ Tgfb2  |
| Foxe1 ~ mmu-miR-193b | mmu-miR-193b ~ Tgfbr3 | Foxe1 ~ Tgfbr3 |
| Foxe1 ~ mmu-miR-19a  | mmu-miR-19a ~ Apaf1   | Foxe1 ~ Apaf1  |
| Foxe1 ~ mmu-miR-19a  | mmu-miR-19a ~ Ctgf    | Foxe1 ~ Ctgf   |
| Foxe1 ~ mmu-miR-19a  | mmu-miR-19a ~ Dicer1  | Foxe1 ~ Dicer1 |
| Foxe1 ~ mmu-miR-19a  | mmu-miR-19a ~ Dlg1    | Foxe1 ~ Dlg1   |
| Foxe1 ~ mmu-miR-19a  | mmu-miR-19a ~ Ephb3   | Foxe1 ~ Ephb3  |
| Foxe1 ~ mmu-miR-19a  | mmu-miR-19a ~ Fgf10   | Foxe1 ~ Fgf10  |
| Foxe1 ~ mmu-miR-19a  | mmu-miR-19a ~ Igf2r   | Foxe1 ~ Igf2r  |
| Foxe1 ~ mmu-miR-19a  | mmu-miR-19a ~ Kcnj2   | Foxe1 ~ Kcnj2  |
| Foxe1 ~ mmu-miR-19a  | mmu-miR-19a ~ Kif3a   | Foxe1 ~ Kif3a  |
| Foxe1 ~ mmu-miR-19a  | mmu-miR-19a ~ Lrp6    | Foxe1 ~ Lrp6   |
| Foxe1 ~ mmu-miR-19a  | mmu-miR-19a ~ Mapk1   | Foxe1 ~ Mapk1  |
| Foxe1 ~ mmu-miR-19a  | mmu-miR-19a ~ Tgfbr2  | Foxe1 ~ Tgfbr2 |
| Foxe1 ~ mmu-miR-200b | mmu-miR-200b ~ Acvr2a | Foxe1 ~ Acvr2a |
| Foxe1 ~ mmu-miR-200b | mmu-miR-200b ~ Apaf1  | Foxe1 ~ Apaf1  |
| Foxe1 ~ mmu-miR-200b | mmu-miR-200b ~ Bmi1   | Foxe1 ~ Bmi1   |
| Foxe1 ~ mmu-miR-200b | mmu-miR-200b ~ Eya4   | Foxe1 ~ Eya4   |
| Foxe1 ~ mmu-miR-200b | mmu-miR-200b ~ Fgf10  | Foxe1 ~ Fgf10  |
| Foxe1 ~ mmu-miR-200b | mmu-miR-200b ~ Impad1 | Foxe1 ~ Impad1 |
| Foxe1 ~ mmu-miR-200b | mmu-miR-200b ~ Mdm4   | Foxe1 ~ Mdm4   |
| Foxe1 ~ mmu-miR-200b | mmu-miR-200b ~ Pdgfra | Foxe1 ~ Pdgfra |
| Foxe1 ~ mmu-miR-200b | mmu-miR-200b ~ Pds5b  | Foxe1 ~ Pds5b  |
| Foxe1 ~ mmu-miR-200b | mmu-miR-200b ~ Piga   | Foxe1 ~ Piga   |
| Foxe1 ~ mmu-miR-200b | mmu-miR-200b ~ Rac1   | Foxe1 ~ Rac1   |
| Foxe1 ~ mmu-miR-200b | mmu-miR-200b ~ Schip1 | Foxe1 ~ Schip1 |
| Foxe1 ~ mmu-miR-200b | mmu-miR-200b ~ Vegfa  | Foxe1 ~ Vegfa  |
| Foxe1 ~ mmu-miR-20a  | mmu-miR-20a ~ Efnb1   | Foxe1 ~ Efnb1  |
| Foxe1 ~ mmu-miR-20a  | mmu-miR-20a ~ Gab1    | Foxe1 ~ Gab1   |
| Foxe1 ~ mmu-miR-20a  | mmu-miR-20a ~ Gad2    | Foxe1 ~ Gad2   |
| Foxe1 ~ mmu-miR-20a  | mmu-miR-20a ~ Luzp1   | Foxe1 ~ Luzp1  |
| Foxe1 ~ mmu-miR-20a  | mmu-miR-20a ~ Pdgfra  | Foxe1 ~ Pdgfra |
| Foxe1 ~ mmu-miR-20a  | mmu-miR-20a ~ Sos1    | Foxe1 ~ Sos1   |
| Foxe1 ~ mmu-miR-20a  | mmu-miR-20a ~ Tgfbr2  | Foxe1 ~ Tgfbr2 |
| Foxe1 ~ mmu-miR-20a  | mmu-miR-20a ~ Vegfa   | Foxe1 ~ Vegfa  |
| Foxe1 ~ mmu-miR-22   | mmu-miR-22 ~ Fgfr1    | Foxe1 ~ Fgfr1  |
| Foxe1 ~ mmu-miR-22   | mmu-miR-22 ~ Fgfr2    | Foxe1 ~ Fgfr2  |
| Foxe1 ~ mmu-miR-22   | mmu-miR-22 ~ Hspg2    | Foxe1 ~ Hspg2  |
| Foxe1 ~ mmu-miR-22   | mmu-miR-22 ~ Tgfbr1   | Foxe1 ~ Tgfbr1 |

|                      |                        |                  |
|----------------------|------------------------|------------------|
| Foxe1 ~ mmu-miR-29a  | mmu-miR-29a ~ Acvr2a   | Foxe1 ~ Acvr2a   |
| Foxe1 ~ mmu-miR-29a  | mmu-miR-29a ~ Adamts20 | Foxe1 ~ Adamts20 |
| Foxe1 ~ mmu-miR-29a  | mmu-miR-29a ~ Adamts9  | Foxe1 ~ Adamts9  |
| Foxe1 ~ mmu-miR-29a  | mmu-miR-29a ~ Bmpr1a   | Foxe1 ~ Bmpr1a   |
| Foxe1 ~ mmu-miR-29a  | mmu-miR-29a ~ Cdc42    | Foxe1 ~ Cdc42    |
| Foxe1 ~ mmu-miR-29a  | mmu-miR-29a ~ Ctnnb1   | Foxe1 ~ Ctnnb1   |
| Foxe1 ~ mmu-miR-29a  | mmu-miR-29a ~ Ctnnbip1 | Foxe1 ~ Ctnnbip1 |
| Foxe1 ~ mmu-miR-29a  | mmu-miR-29a ~ Dicer1   | Foxe1 ~ Dicer1   |
| Foxe1 ~ mmu-miR-29a  | mmu-miR-29a ~ Efna5    | Foxe1 ~ Efna5    |
| Foxe1 ~ mmu-miR-29a  | mmu-miR-29a ~ Ephb3    | Foxe1 ~ Ephb3    |
| Foxe1 ~ mmu-miR-29a  | mmu-miR-29a ~ Fign     | Foxe1 ~ Fign     |
| Foxe1 ~ mmu-miR-29a  | mmu-miR-29a ~ Gab1     | Foxe1 ~ Gab1     |
| Foxe1 ~ mmu-miR-29a  | mmu-miR-29a ~ Gsk3b    | Foxe1 ~ Gsk3b    |
| Foxe1 ~ mmu-miR-29a  | mmu-miR-29a ~ Itgb1    | Foxe1 ~ Itgb1    |
| Foxe1 ~ mmu-miR-29a  | mmu-miR-29a ~ Lims1    | Foxe1 ~ Lims1    |
| Foxe1 ~ mmu-miR-29a  | mmu-miR-29a ~ Luzp1    | Foxe1 ~ Luzp1    |
| Foxe1 ~ mmu-miR-29a  | mmu-miR-29a ~ Pdgfc    | Foxe1 ~ Pdgfc    |
| Foxe1 ~ mmu-miR-29a  | mmu-miR-29a ~ Pdgfrb   | Foxe1 ~ Pdgfrb   |
| Foxe1 ~ mmu-miR-29a  | mmu-miR-29a ~ Phe1     | Foxe1 ~ Phe1     |
| Foxe1 ~ mmu-miR-29a  | mmu-miR-29a ~ Plekha1  | Foxe1 ~ Plekha1  |
| Foxe1 ~ mmu-miR-29a  | mmu-miR-29a ~ Ptpn11   | Foxe1 ~ Ptpn11   |
| Foxe1 ~ mmu-miR-29a  | mmu-miR-29a ~ Schip1   | Foxe1 ~ Schip1   |
| Foxe1 ~ mmu-miR-29a  | mmu-miR-29a ~ Spry1    | Foxe1 ~ Spry1    |
| Foxe1 ~ mmu-miR-29a  | mmu-miR-29a ~ Tgfb2    | Foxe1 ~ Tgfb2    |
| Foxe1 ~ mmu-miR-29a  | mmu-miR-29a ~ Vegfa    | Foxe1 ~ Vegfa    |
| Foxe1 ~ mmu-miR-302a | mmu-miR-302a ~ Adamts9 | Foxe1 ~ Adamts9  |
| Foxe1 ~ mmu-miR-302a | mmu-miR-302a ~ Ednrb   | Foxe1 ~ Ednrb    |
| Foxe1 ~ mmu-miR-302a | mmu-miR-302a ~ Fgf10   | Foxe1 ~ Fgf10    |
| Foxe1 ~ mmu-miR-302a | mmu-miR-302a ~ Gad2    | Foxe1 ~ Gad2     |
| Foxe1 ~ mmu-miR-302a | mmu-miR-302a ~ Gsk3b   | Foxe1 ~ Gsk3b    |
| Foxe1 ~ mmu-miR-302a | mmu-miR-302a ~ Rad23b  | Foxe1 ~ Rad23b   |
| Foxe1 ~ mmu-miR-302a | mmu-miR-302a ~ Tgfbr1  | Foxe1 ~ Tgfbr1   |
| Foxe1 ~ mmu-miR-302a | mmu-miR-302a ~ Tgfbr2  | Foxe1 ~ Tgfbr2   |
| Foxe1 ~ mmu-miR-302a | mmu-miR-302a ~ Tiparp  | Foxe1 ~ Tiparp   |
| Foxe1 ~ mmu-miR-302a | mmu-miR-302a ~ Vegfa   | Foxe1 ~ Vegfa    |
| Foxe1 ~ mmu-miR-30a  | mmu-miR-30a ~ Acvr1    | Foxe1 ~ Acvr1    |
| Foxe1 ~ mmu-miR-30a  | mmu-miR-30a ~ Adamts9  | Foxe1 ~ Adamts9  |
| Foxe1 ~ mmu-miR-30a  | mmu-miR-30a ~ Apaf1    | Foxe1 ~ Apaf1    |
| Foxe1 ~ mmu-miR-30a  | mmu-miR-30a ~ Chd7     | Foxe1 ~ Chd7     |
| Foxe1 ~ mmu-miR-30a  | mmu-miR-30a ~ Ednrb    | Foxe1 ~ Ednrb    |
| Foxe1 ~ mmu-miR-30a  | mmu-miR-30a ~ Ephb2    | Foxe1 ~ Ephb2    |
| Foxe1 ~ mmu-miR-30a  | mmu-miR-30a ~ Eya1     | Foxe1 ~ Eya1     |
| Foxe1 ~ mmu-miR-30a  | mmu-miR-30a ~ Eya4     | Foxe1 ~ Eya4     |
| Foxe1 ~ mmu-miR-30a  | mmu-miR-30a ~ Fgf10    | Foxe1 ~ Fgf10    |
| Foxe1 ~ mmu-miR-30a  | mmu-miR-30a ~ Fign     | Foxe1 ~ Fign     |
| Foxe1 ~ mmu-miR-30a  | mmu-miR-30a ~ Fst      | Foxe1 ~ Fst      |
| Foxe1 ~ mmu-miR-30a  | mmu-miR-30a ~ Fzd2     | Foxe1 ~ Fzd2     |

|                     |                        |                  |
|---------------------|------------------------|------------------|
| Foxe1 ~ mmu-miR-30a | mmu-miR-30a ~ Fzd7     | Foxe1 ~ Fzd7     |
| Foxe1 ~ mmu-miR-30a | mmu-miR-30a ~ Glce     | Foxe1 ~ Glce     |
| Foxe1 ~ mmu-miR-30a | mmu-miR-30a ~ Igf2r    | Foxe1 ~ Igf2r    |
| Foxe1 ~ mmu-miR-30a | mmu-miR-30a ~ Inhba    | Foxe1 ~ Inhba    |
| Foxe1 ~ mmu-miR-30a | mmu-miR-30a ~ Insig2   | Foxe1 ~ Insig2   |
| Foxe1 ~ mmu-miR-30a | mmu-miR-30a ~ Kif3a    | Foxe1 ~ Kif3a    |
| Foxe1 ~ mmu-miR-30a | mmu-miR-30a ~ Mdm4     | Foxe1 ~ Mdm4     |
| Foxe1 ~ mmu-miR-30a | mmu-miR-30a ~ Pds5b    | Foxe1 ~ Pds5b    |
| Foxe1 ~ mmu-miR-30a | mmu-miR-30a ~ Piga     | Foxe1 ~ Piga     |
| Foxe1 ~ mmu-miR-30a | mmu-miR-30a ~ Prickle1 | Foxe1 ~ Prickle1 |
| Foxe1 ~ mmu-miR-30a | mmu-miR-30a ~ Rad23b   | Foxe1 ~ Rad23b   |
| Foxe1 ~ mmu-miR-30a | mmu-miR-30a ~ Sos1     | Foxe1 ~ Sos1     |
| Foxe1 ~ mmu-miR-362 | mmu-miR-362 ~ Acvr1    | Foxe1 ~ Acvr1    |
| Foxe1 ~ mmu-miR-362 | mmu-miR-362 ~ Adamts9  | Foxe1 ~ Adamts9  |
| Foxe1 ~ mmu-miR-362 | mmu-miR-362 ~ Akap8    | Foxe1 ~ Akap8    |
| Foxe1 ~ mmu-miR-362 | mmu-miR-362 ~ Cask     | Foxe1 ~ Cask     |
| Foxe1 ~ mmu-miR-362 | mmu-miR-362 ~ Chd7     | Foxe1 ~ Chd7     |
| Foxe1 ~ mmu-miR-362 | mmu-miR-362 ~ Ednrb    | Foxe1 ~ Ednrb    |
| Foxe1 ~ mmu-miR-362 | mmu-miR-362 ~ Eya1     | Foxe1 ~ Eya1     |
| Foxe1 ~ mmu-miR-362 | mmu-miR-362 ~ Gad2     | Foxe1 ~ Gad2     |
| Foxe1 ~ mmu-miR-362 | mmu-miR-362 ~ Grb2     | Foxe1 ~ Grb2     |
| Foxe1 ~ mmu-miR-362 | mmu-miR-362 ~ Gsk3b    | Foxe1 ~ Gsk3b    |
| Foxe1 ~ mmu-miR-362 | mmu-miR-362 ~ Insig2   | Foxe1 ~ Insig2   |
| Foxe1 ~ mmu-miR-367 | mmu-miR-367 ~ Cask     | Foxe1 ~ Cask     |
| Foxe1 ~ mmu-miR-367 | mmu-miR-367 ~ Cdkn1c   | Foxe1 ~ Cdkn1c   |
| Foxe1 ~ mmu-miR-367 | mmu-miR-367 ~ Fst      | Foxe1 ~ Fst      |
| Foxe1 ~ mmu-miR-367 | mmu-miR-367 ~ Ick      | Foxe1 ~ Ick      |
| Foxe1 ~ mmu-miR-367 | mmu-miR-367 ~ Itgav    | Foxe1 ~ Itgav    |
| Foxe1 ~ mmu-miR-367 | mmu-miR-367 ~ Luzp1    | Foxe1 ~ Luzp1    |
| Foxe1 ~ mmu-miR-367 | mmu-miR-367 ~ Pds5b    | Foxe1 ~ Pds5b    |
| Foxe1 ~ mmu-miR-367 | mmu-miR-367 ~ Plekha1  | Foxe1 ~ Plekha1  |
| Foxe1 ~ mmu-miR-367 | mmu-miR-367 ~ Slc12a5  | Foxe1 ~ Slc12a5  |
| Foxe1 ~ mmu-miR-369 | mmu-miR-369 ~ Cask     | Foxe1 ~ Cask     |
| Foxe1 ~ mmu-miR-369 | mmu-miR-369 ~ Eya1     | Foxe1 ~ Eya1     |
| Foxe1 ~ mmu-miR-369 | mmu-miR-369 ~ Gabrb3   | Foxe1 ~ Gabrb3   |
| Foxe1 ~ mmu-miR-369 | mmu-miR-369 ~ Gsk3b    | Foxe1 ~ Gsk3b    |
| Foxe1 ~ mmu-miR-423 | mmu-miR-423 ~ Fuz      | Foxe1 ~ Fuz      |
| Foxe1 ~ mmu-miR-452 | mmu-miR-452 ~ Ephb3    | Foxe1 ~ Ephb3    |
| Foxe1 ~ mmu-miR-452 | mmu-miR-452 ~ Lrp6     | Foxe1 ~ Lrp6     |
| Foxf2 ~ mmu-let-7b  | mmu-let-7b ~ Bmpr1a    | Foxf2 ~ Bmpr1a   |
| Foxf2 ~ mmu-let-7b  | mmu-let-7b ~ Cask      | Foxf2 ~ Cask     |
| Foxf2 ~ mmu-let-7b  | mmu-let-7b ~ Chd7      | Foxf2 ~ Chd7     |
| Foxf2 ~ mmu-let-7b  | mmu-let-7b ~ Fign      | Foxf2 ~ Fign     |
| Foxf2 ~ mmu-let-7b  | mmu-let-7b ~ Piga      | Foxf2 ~ Piga     |
| Foxf2 ~ mmu-let-7b  | mmu-let-7b ~ Rspo2     | Foxf2 ~ Rspo2    |
| Foxf2 ~ mmu-let-7b  | mmu-let-7b ~ Tgfbr1    | Foxf2 ~ Tgfbr1   |
| Foxf2 ~ mmu-let-7b  | mmu-let-7b ~ Tgfbr3    | Foxf2 ~ Tgfbr3   |

|                      |                        |                  |
|----------------------|------------------------|------------------|
| Foxf2 ~ mmu-miR-133b | mmu-miR-133b ~ Ctgf    | Foxf2 ~ Ctgf     |
| Foxf2 ~ mmu-miR-133b | mmu-miR-133b ~ Eya4    | Foxf2 ~ Eya4     |
| Foxf2 ~ mmu-miR-133b | mmu-miR-133b ~ Fgfr1   | Foxf2 ~ Fgfr1    |
| Foxf2 ~ mmu-miR-133b | mmu-miR-133b ~ Fst     | Foxf2 ~ Fst      |
| Foxf2 ~ mmu-miR-133b | mmu-miR-133b ~ Tgfbr1  | Foxf2 ~ Tgfbr1   |
| Foxf2 ~ mmu-miR-17   | mmu-miR-17 ~ Efnb1     | Foxf2 ~ Efnb1    |
| Foxf2 ~ mmu-miR-17   | mmu-miR-17 ~ Fzd7      | Foxf2 ~ Fzd7     |
| Foxf2 ~ mmu-miR-17   | mmu-miR-17 ~ Gab1      | Foxf2 ~ Gab1     |
| Foxf2 ~ mmu-miR-17   | mmu-miR-17 ~ Gad2      | Foxf2 ~ Gad2     |
| Foxf2 ~ mmu-miR-17   | mmu-miR-17 ~ Ift88     | Foxf2 ~ Ift88    |
| Foxf2 ~ mmu-miR-17   | mmu-miR-17 ~ Luzp1     | Foxf2 ~ Luzp1    |
| Foxf2 ~ mmu-miR-17   | mmu-miR-17 ~ Pdgfra    | Foxf2 ~ Pdgfra   |
| Foxf2 ~ mmu-miR-17   | mmu-miR-17 ~ Sos1      | Foxf2 ~ Sos1     |
| Foxf2 ~ mmu-miR-17   | mmu-miR-17 ~ Tgfbr2    | Foxf2 ~ Tgfbr2   |
| Foxf2 ~ mmu-miR-17   | mmu-miR-17 ~ Vegfa     | Foxf2 ~ Vegfa    |
| Foxf2 ~ mmu-miR-188  | mmu-miR-188 ~ Ctnnbip1 | Foxf2 ~ Ctnnbip1 |
| Foxf2 ~ mmu-miR-188  | mmu-miR-188 ~ Sos1     | Foxf2 ~ Sos1     |
| Foxf2 ~ mmu-miR-18a  | mmu-miR-18a ~ Ap2b1    | Foxf2 ~ Ap2b1    |
| Foxf2 ~ mmu-miR-18a  | mmu-miR-18a ~ Cdc42    | Foxf2 ~ Cdc42    |
| Foxf2 ~ mmu-miR-18a  | mmu-miR-18a ~ Ctgf     | Foxf2 ~ Ctgf     |
| Foxf2 ~ mmu-miR-18a  | mmu-miR-18a ~ Gab1     | Foxf2 ~ Gab1     |
| Foxf2 ~ mmu-miR-18a  | mmu-miR-18a ~ Mapk1    | Foxf2 ~ Mapk1    |
| Foxf2 ~ mmu-miR-193b | mmu-miR-193b ~ Ap2b1   | Foxf2 ~ Ap2b1    |
| Foxf2 ~ mmu-miR-193b | mmu-miR-193b ~ Dlg1    | Foxf2 ~ Dlg1     |
| Foxf2 ~ mmu-miR-193b | mmu-miR-193b ~ Kcnj2   | Foxf2 ~ Kcnj2    |
| Foxf2 ~ mmu-miR-193b | mmu-miR-193b ~ Ptpfrf  | Foxf2 ~ Ptpfrf   |
| Foxf2 ~ mmu-miR-193b | mmu-miR-193b ~ Tgfb2   | Foxf2 ~ Tgfb2    |
| Foxf2 ~ mmu-miR-193b | mmu-miR-193b ~ Tgfbr3  | Foxf2 ~ Tgfbr3   |
| Foxf2 ~ mmu-miR-19a  | mmu-miR-19a ~ Apaf1    | Foxf2 ~ Apaf1    |
| Foxf2 ~ mmu-miR-19a  | mmu-miR-19a ~ Ctgf     | Foxf2 ~ Ctgf     |
| Foxf2 ~ mmu-miR-19a  | mmu-miR-19a ~ Dicer1   | Foxf2 ~ Dicer1   |
| Foxf2 ~ mmu-miR-19a  | mmu-miR-19a ~ Dlg1     | Foxf2 ~ Dlg1     |
| Foxf2 ~ mmu-miR-19a  | mmu-miR-19a ~ Ephb3    | Foxf2 ~ Ephb3    |
| Foxf2 ~ mmu-miR-19a  | mmu-miR-19a ~ Fgf10    | Foxf2 ~ Fgf10    |
| Foxf2 ~ mmu-miR-19a  | mmu-miR-19a ~ Igf2r    | Foxf2 ~ Igf2r    |
| Foxf2 ~ mmu-miR-19a  | mmu-miR-19a ~ Kcnj2    | Foxf2 ~ Kcnj2    |
| Foxf2 ~ mmu-miR-19a  | mmu-miR-19a ~ Kif3a    | Foxf2 ~ Kif3a    |
| Foxf2 ~ mmu-miR-19a  | mmu-miR-19a ~ Lrp6     | Foxf2 ~ Lrp6     |
| Foxf2 ~ mmu-miR-19a  | mmu-miR-19a ~ Mapk1    | Foxf2 ~ Mapk1    |
| Foxf2 ~ mmu-miR-19a  | mmu-miR-19a ~ Tgfbr2   | Foxf2 ~ Tgfbr2   |
| Foxf2 ~ mmu-miR-200b | mmu-miR-200b ~ Acvr2a  | Foxf2 ~ Acvr2a   |
| Foxf2 ~ mmu-miR-200b | mmu-miR-200b ~ Apaf1   | Foxf2 ~ Apaf1    |
| Foxf2 ~ mmu-miR-200b | mmu-miR-200b ~ Bmi1    | Foxf2 ~ Bmi1     |
| Foxf2 ~ mmu-miR-200b | mmu-miR-200b ~ Eya4    | Foxf2 ~ Eya4     |
| Foxf2 ~ mmu-miR-200b | mmu-miR-200b ~ Fgf10   | Foxf2 ~ Fgf10    |
| Foxf2 ~ mmu-miR-200b | mmu-miR-200b ~ Impad1  | Foxf2 ~ Impad1   |
| Foxf2 ~ mmu-miR-200b | mmu-miR-200b ~ Mdm4    | Foxf2 ~ Mdm4     |

|                      |                        |                  |
|----------------------|------------------------|------------------|
| Foxf2 ~ mmu-miR-200b | mmu-miR-200b ~ Pdgfra  | Foxf2 ~ Pdgfra   |
| Foxf2 ~ mmu-miR-200b | mmu-miR-200b ~ Pds5b   | Foxf2 ~ Pds5b    |
| Foxf2 ~ mmu-miR-200b | mmu-miR-200b ~ Piga    | Foxf2 ~ Piga     |
| Foxf2 ~ mmu-miR-200b | mmu-miR-200b ~ Rac1    | Foxf2 ~ Rac1     |
| Foxf2 ~ mmu-miR-200b | mmu-miR-200b ~ Schip1  | Foxf2 ~ Schip1   |
| Foxf2 ~ mmu-miR-200b | mmu-miR-200b ~ Vegfa   | Foxf2 ~ Vegfa    |
| Foxf2 ~ mmu-miR-20a  | mmu-miR-20a ~ Efnb1    | Foxf2 ~ Efnb1    |
| Foxf2 ~ mmu-miR-20a  | mmu-miR-20a ~ Gab1     | Foxf2 ~ Gab1     |
| Foxf2 ~ mmu-miR-20a  | mmu-miR-20a ~ Gad2     | Foxf2 ~ Gad2     |
| Foxf2 ~ mmu-miR-20a  | mmu-miR-20a ~ Luzp1    | Foxf2 ~ Luzp1    |
| Foxf2 ~ mmu-miR-20a  | mmu-miR-20a ~ Pdgfra   | Foxf2 ~ Pdgfra   |
| Foxf2 ~ mmu-miR-20a  | mmu-miR-20a ~ Sos1     | Foxf2 ~ Sos1     |
| Foxf2 ~ mmu-miR-20a  | mmu-miR-20a ~ Tgfbr2   | Foxf2 ~ Tgfbr2   |
| Foxf2 ~ mmu-miR-20a  | mmu-miR-20a ~ Vegfa    | Foxf2 ~ Vegfa    |
| Foxf2 ~ mmu-miR-22   | mmu-miR-22 ~ Fgfr1     | Foxf2 ~ Fgfr1    |
| Foxf2 ~ mmu-miR-22   | mmu-miR-22 ~ Fgfr2     | Foxf2 ~ Fgfr2    |
| Foxf2 ~ mmu-miR-22   | mmu-miR-22 ~ Hspg2     | Foxf2 ~ Hspg2    |
| Foxf2 ~ mmu-miR-22   | mmu-miR-22 ~ Tgfbr1    | Foxf2 ~ Tgfbr1   |
| Foxf2 ~ mmu-miR-29a  | mmu-miR-29a ~ Acvr2a   | Foxf2 ~ Acvr2a   |
| Foxf2 ~ mmu-miR-29a  | mmu-miR-29a ~ Adamts20 | Foxf2 ~ Adamts20 |
| Foxf2 ~ mmu-miR-29a  | mmu-miR-29a ~ Adamts9  | Foxf2 ~ Adamts9  |
| Foxf2 ~ mmu-miR-29a  | mmu-miR-29a ~ Bmpr1a   | Foxf2 ~ Bmpr1a   |
| Foxf2 ~ mmu-miR-29a  | mmu-miR-29a ~ Cdc42    | Foxf2 ~ Cdc42    |
| Foxf2 ~ mmu-miR-29a  | mmu-miR-29a ~ Ctnnb1   | Foxf2 ~ Ctnnb1   |
| Foxf2 ~ mmu-miR-29a  | mmu-miR-29a ~ Ctnnbip1 | Foxf2 ~ Ctnnbip1 |
| Foxf2 ~ mmu-miR-29a  | mmu-miR-29a ~ Dicer1   | Foxf2 ~ Dicer1   |
| Foxf2 ~ mmu-miR-29a  | mmu-miR-29a ~ Efna5    | Foxf2 ~ Efna5    |
| Foxf2 ~ mmu-miR-29a  | mmu-miR-29a ~ Ephb3    | Foxf2 ~ Ephb3    |
| Foxf2 ~ mmu-miR-29a  | mmu-miR-29a ~ Fign     | Foxf2 ~ Fign     |
| Foxf2 ~ mmu-miR-29a  | mmu-miR-29a ~ Gab1     | Foxf2 ~ Gab1     |
| Foxf2 ~ mmu-miR-29a  | mmu-miR-29a ~ Gsk3b    | Foxf2 ~ Gsk3b    |
| Foxf2 ~ mmu-miR-29a  | mmu-miR-29a ~ Itgb1    | Foxf2 ~ Itgb1    |
| Foxf2 ~ mmu-miR-29a  | mmu-miR-29a ~ Lims1    | Foxf2 ~ Lims1    |
| Foxf2 ~ mmu-miR-29a  | mmu-miR-29a ~ Luzp1    | Foxf2 ~ Luzp1    |
| Foxf2 ~ mmu-miR-29a  | mmu-miR-29a ~ Pdgfc    | Foxf2 ~ Pdgfc    |
| Foxf2 ~ mmu-miR-29a  | mmu-miR-29a ~ Pdgfrb   | Foxf2 ~ Pdgfrb   |
| Foxf2 ~ mmu-miR-29a  | mmu-miR-29a ~ Phc1     | Foxf2 ~ Phc1     |
| Foxf2 ~ mmu-miR-29a  | mmu-miR-29a ~ Plekha1  | Foxf2 ~ Plekha1  |
| Foxf2 ~ mmu-miR-29a  | mmu-miR-29a ~ Ptpn11   | Foxf2 ~ Ptpn11   |
| Foxf2 ~ mmu-miR-29a  | mmu-miR-29a ~ Schip1   | Foxf2 ~ Schip1   |
| Foxf2 ~ mmu-miR-29a  | mmu-miR-29a ~ Spry1    | Foxf2 ~ Spry1    |
| Foxf2 ~ mmu-miR-29a  | mmu-miR-29a ~ Tgfb2    | Foxf2 ~ Tgfb2    |
| Foxf2 ~ mmu-miR-29a  | mmu-miR-29a ~ Vegfa    | Foxf2 ~ Vegfa    |
| Foxf2 ~ mmu-miR-302a | mmu-miR-302a ~ Adamts9 | Foxf2 ~ Adamts9  |
| Foxf2 ~ mmu-miR-302a | mmu-miR-302a ~ Ednrb   | Foxf2 ~ Ednrb    |
| Foxf2 ~ mmu-miR-302a | mmu-miR-302a ~ Fgf10   | Foxf2 ~ Fgf10    |
| Foxf2 ~ mmu-miR-302a | mmu-miR-302a ~ Gad2    | Foxf2 ~ Gad2     |

|                      |                        |                  |
|----------------------|------------------------|------------------|
| Foxf2 ~ mmu-miR-302a | mmu-miR-302a ~ Gsk3b   | Foxf2 ~ Gsk3b    |
| Foxf2 ~ mmu-miR-302a | mmu-miR-302a ~ Rad23b  | Foxf2 ~ Rad23b   |
| Foxf2 ~ mmu-miR-302a | mmu-miR-302a ~ Tgfbr1  | Foxf2 ~ Tgfbr1   |
| Foxf2 ~ mmu-miR-302a | mmu-miR-302a ~ Tgfbr2  | Foxf2 ~ Tgfbr2   |
| Foxf2 ~ mmu-miR-302a | mmu-miR-302a ~ Tiparp  | Foxf2 ~ Tiparp   |
| Foxf2 ~ mmu-miR-302a | mmu-miR-302a ~ Vegfa   | Foxf2 ~ Vegfa    |
| Foxf2 ~ mmu-miR-30a  | mmu-miR-30a ~ Acvr1    | Foxf2 ~ Acvr1    |
| Foxf2 ~ mmu-miR-30a  | mmu-miR-30a ~ Adamts9  | Foxf2 ~ Adamts9  |
| Foxf2 ~ mmu-miR-30a  | mmu-miR-30a ~ Apaf1    | Foxf2 ~ Apaf1    |
| Foxf2 ~ mmu-miR-30a  | mmu-miR-30a ~ Chd7     | Foxf2 ~ Chd7     |
| Foxf2 ~ mmu-miR-30a  | mmu-miR-30a ~ Ednrb    | Foxf2 ~ Ednrb    |
| Foxf2 ~ mmu-miR-30a  | mmu-miR-30a ~ Ephb2    | Foxf2 ~ Ephb2    |
| Foxf2 ~ mmu-miR-30a  | mmu-miR-30a ~ Eya1     | Foxf2 ~ Eya1     |
| Foxf2 ~ mmu-miR-30a  | mmu-miR-30a ~ Eya4     | Foxf2 ~ Eya4     |
| Foxf2 ~ mmu-miR-30a  | mmu-miR-30a ~ Fgf10    | Foxf2 ~ Fgf10    |
| Foxf2 ~ mmu-miR-30a  | mmu-miR-30a ~ Fign     | Foxf2 ~ Fign     |
| Foxf2 ~ mmu-miR-30a  | mmu-miR-30a ~ Fst      | Foxf2 ~ Fst      |
| Foxf2 ~ mmu-miR-30a  | mmu-miR-30a ~ Fzd2     | Foxf2 ~ Fzd2     |
| Foxf2 ~ mmu-miR-30a  | mmu-miR-30a ~ Fzd7     | Foxf2 ~ Fzd7     |
| Foxf2 ~ mmu-miR-30a  | mmu-miR-30a ~ Glce     | Foxf2 ~ Glce     |
| Foxf2 ~ mmu-miR-30a  | mmu-miR-30a ~ Igf2r    | Foxf2 ~ Igf2r    |
| Foxf2 ~ mmu-miR-30a  | mmu-miR-30a ~ Inhba    | Foxf2 ~ Inhba    |
| Foxf2 ~ mmu-miR-30a  | mmu-miR-30a ~ Insig2   | Foxf2 ~ Insig2   |
| Foxf2 ~ mmu-miR-30a  | mmu-miR-30a ~ Kif3a    | Foxf2 ~ Kif3a    |
| Foxf2 ~ mmu-miR-30a  | mmu-miR-30a ~ Mdm4     | Foxf2 ~ Mdm4     |
| Foxf2 ~ mmu-miR-30a  | mmu-miR-30a ~ Pds5b    | Foxf2 ~ Pds5b    |
| Foxf2 ~ mmu-miR-30a  | mmu-miR-30a ~ Piga     | Foxf2 ~ Piga     |
| Foxf2 ~ mmu-miR-30a  | mmu-miR-30a ~ Prickle1 | Foxf2 ~ Prickle1 |
| Foxf2 ~ mmu-miR-30a  | mmu-miR-30a ~ Rad23b   | Foxf2 ~ Rad23b   |
| Foxf2 ~ mmu-miR-30a  | mmu-miR-30a ~ Sos1     | Foxf2 ~ Sos1     |
| Foxf2 ~ mmu-miR-362  | mmu-miR-362 ~ Acvr1    | Foxf2 ~ Acvr1    |
| Foxf2 ~ mmu-miR-362  | mmu-miR-362 ~ Adamts9  | Foxf2 ~ Adamts9  |
| Foxf2 ~ mmu-miR-362  | mmu-miR-362 ~ Akap8    | Foxf2 ~ Akap8    |
| Foxf2 ~ mmu-miR-362  | mmu-miR-362 ~ Cask     | Foxf2 ~ Cask     |
| Foxf2 ~ mmu-miR-362  | mmu-miR-362 ~ Chd7     | Foxf2 ~ Chd7     |
| Foxf2 ~ mmu-miR-362  | mmu-miR-362 ~ Ednrb    | Foxf2 ~ Ednrb    |
| Foxf2 ~ mmu-miR-362  | mmu-miR-362 ~ Eya1     | Foxf2 ~ Eya1     |
| Foxf2 ~ mmu-miR-362  | mmu-miR-362 ~ Gad2     | Foxf2 ~ Gad2     |
| Foxf2 ~ mmu-miR-362  | mmu-miR-362 ~ Grb2     | Foxf2 ~ Grb2     |
| Foxf2 ~ mmu-miR-362  | mmu-miR-362 ~ Gsk3b    | Foxf2 ~ Gsk3b    |
| Foxf2 ~ mmu-miR-362  | mmu-miR-362 ~ Insig2   | Foxf2 ~ Insig2   |
| Foxf2 ~ mmu-miR-367  | mmu-miR-367 ~ Cask     | Foxf2 ~ Cask     |
| Foxf2 ~ mmu-miR-367  | mmu-miR-367 ~ Cdkn1c   | Foxf2 ~ Cdkn1c   |
| Foxf2 ~ mmu-miR-367  | mmu-miR-367 ~ Fst      | Foxf2 ~ Fst      |
| Foxf2 ~ mmu-miR-367  | mmu-miR-367 ~ Ick      | Foxf2 ~ Ick      |
| Foxf2 ~ mmu-miR-367  | mmu-miR-367 ~ Itgav    | Foxf2 ~ Itgav    |
| Foxf2 ~ mmu-miR-367  | mmu-miR-367 ~ Luzp1    | Foxf2 ~ Luzp1    |

|                      |                        |                 |
|----------------------|------------------------|-----------------|
| Foxf2 ~ mmu-miR-367  | mmu-miR-367 ~ Pds5b    | Foxf2 ~ Pds5b   |
| Foxf2 ~ mmu-miR-367  | mmu-miR-367 ~ Plekha1  | Foxf2 ~ Plekha1 |
| Foxf2 ~ mmu-miR-367  | mmu-miR-367 ~ Slc12a5  | Foxf2 ~ Slc12a5 |
| Foxf2 ~ mmu-miR-369  | mmu-miR-369 ~ Cask     | Foxf2 ~ Cask    |
| Foxf2 ~ mmu-miR-369  | mmu-miR-369 ~ Eya1     | Foxf2 ~ Eya1    |
| Foxf2 ~ mmu-miR-369  | mmu-miR-369 ~ Gabrb3   | Foxf2 ~ Gabrb3  |
| Foxf2 ~ mmu-miR-369  | mmu-miR-369 ~ Gsk3b    | Foxf2 ~ Gsk3b   |
| Foxf2 ~ mmu-miR-423  | mmu-miR-423 ~ Fuz      | Foxf2 ~ Fuz     |
| Foxf2 ~ mmu-miR-452  | mmu-miR-452 ~ Ephb3    | Foxf2 ~ Ephb3   |
| Foxf2 ~ mmu-miR-452  | mmu-miR-452 ~ Lrp6     | Foxf2 ~ Lrp6    |
| Gli2 ~ mmu-miR-152   | mmu-miR-152 ~ Chuk     | Gli2 ~ Chuk     |
| Gli2 ~ mmu-miR-152   | mmu-miR-152 ~ Sos1     | Gli2 ~ Sos1     |
| Gli2 ~ mmu-miR-188   | mmu-miR-188 ~ Sos1     | Gli2 ~ Sos1     |
| Gli2 ~ mmu-miR-203   | mmu-miR-203 ~ Ick      | Gli2 ~ Ick      |
| Gli2 ~ mmu-miR-203   | mmu-miR-203 ~ Wls      | Gli2 ~ Wls      |
| Gli2 ~ mmu-miR-30a   | mmu-miR-30a ~ Apaf1    | Gli2 ~ Apaf1    |
| Gli2 ~ mmu-miR-30a   | mmu-miR-30a ~ Fst      | Gli2 ~ Fst      |
| Gli2 ~ mmu-miR-30a   | mmu-miR-30a ~ Rad23b   | Gli2 ~ Rad23b   |
| Gli2 ~ mmu-miR-30a   | mmu-miR-30a ~ Sos1     | Gli2 ~ Sos1     |
| Gli2 ~ mmu-miR-362   | mmu-miR-362 ~ Gsk3b    | Gli2 ~ Gsk3b    |
| Gli2 ~ mmu-miR-362   | mmu-miR-362 ~ Loxl3    | Gli2 ~ Loxl3    |
| Gli2 ~ mmu-miR-369   | mmu-miR-369 ~ Gsk3b    | Gli2 ~ Gsk3b    |
| Gli3 ~ mmu-miR-369   | mmu-miR-369 ~ Gsk3b    | Gli3 ~ Gsk3b    |
| Gsc ~ mmu-miR-152    | mmu-miR-152 ~ Itga5    | Gsc ~ Itga5     |
| Gsc ~ mmu-miR-152    | mmu-miR-152 ~ Nrp1     | Gsc ~ Nrp1      |
| Gsc ~ mmu-miR-200b   | mmu-miR-200b ~ Pdgfra  | Gsc ~ Pdgfra    |
| Hand1 ~ mmu-miR-367  | mmu-miR-367 ~ Itga5    | Hand1 ~ Itga5   |
| Hand1 ~ mmu-miR-367  | mmu-miR-367 ~ Plekha1  | Hand1 ~ Plekha1 |
| Hand2 ~ mmu-miR-367  | mmu-miR-367 ~ Itga5    | Hand2 ~ Itga5   |
| Hand2 ~ mmu-miR-367  | mmu-miR-367 ~ Plekha1  | Hand2 ~ Plekha1 |
| Hic1 ~ mmu-miR-29a   | mmu-miR-29a ~ Luzp1    | Hic1 ~ Luzp1    |
| Hic1 ~ mmu-miR-29a   | mmu-miR-29a ~ Ptpn11   | Hic1 ~ Ptpn11   |
| Mef2c ~ mmu-let-7b   | mmu-let-7b ~ Piga      | Mef2c ~ Piga    |
| Mef2c ~ mmu-miR-193b | mmu-miR-193b ~ Tgfb2   | Mef2c ~ Tgfb2   |
| Pax9 ~ mmu-miR-140   | mmu-miR-140 ~ Hs2st1   | Pax9 ~ Hs2st1   |
| Pax9 ~ mmu-miR-140   | mmu-miR-140 ~ Pdgfra   | Pax9 ~ Pdgfra   |
| Pax9 ~ mmu-miR-140   | mmu-miR-140 ~ Rac1     | Pax9 ~ Rac1     |
| Pax9 ~ mmu-miR-140   | mmu-miR-140 ~ Tgfbr1   | Pax9 ~ Tgfbr1   |
| Pax9 ~ mmu-miR-152   | mmu-miR-152 ~ Acvr1    | Pax9 ~ Acvr1    |
| Pax9 ~ mmu-miR-152   | mmu-miR-152 ~ Col2a1   | Pax9 ~ Col2a1   |
| Pax9 ~ mmu-miR-152   | mmu-miR-152 ~ Fbxo11   | Pax9 ~ Fbxo11   |
| Pax9 ~ mmu-miR-152   | mmu-miR-152 ~ Itgb6    | Pax9 ~ Itgb6    |
| Pax9 ~ mmu-miR-152   | mmu-miR-152 ~ Itgb8    | Pax9 ~ Itgb8    |
| Pax9 ~ mmu-miR-152   | mmu-miR-152 ~ Tgfb2    | Pax9 ~ Tgfb2    |
| Pax9 ~ mmu-miR-152   | mmu-miR-152 ~ Tgfbr1   | Pax9 ~ Tgfbr1   |
| Pax9 ~ mmu-miR-154   | mmu-miR-154 ~ Bmpr1a   | Pax9 ~ Bmpr1a   |
| Pax9 ~ mmu-miR-188   | mmu-miR-188 ~ Ctnnbip1 | Pax9 ~ Ctnnbip1 |



|                      |                       |                |
|----------------------|-----------------------|----------------|
| Pax9 ~ mmu-miR-188   | mmu-miR-188 ~ Fbxo11  | Pax9 ~ Fbxo11  |
| Pax9 ~ mmu-miR-193b  | mmu-miR-193b ~ Kcnj2  | Pax9 ~ Kcnj2   |
| Pax9 ~ mmu-miR-193b  | mmu-miR-193b ~ Mmp14  | Pax9 ~ Mmp14   |
| Pax9 ~ mmu-miR-193b  | mmu-miR-193b ~ Tgfb2  | Pax9 ~ Tgfb2   |
| Pax9 ~ mmu-miR-203   | mmu-miR-203 ~ Acvr2a  | Pax9 ~ Acvr2a  |
| Pax9 ~ mmu-miR-203   | mmu-miR-203 ~ Cask    | Pax9 ~ Cask    |
| Pax9 ~ mmu-miR-203   | mmu-miR-203 ~ Eya1    | Pax9 ~ Eya1    |
| Pax9 ~ mmu-miR-203   | mmu-miR-203 ~ Fbxo11  | Pax9 ~ Fbxo11  |
| Pax9 ~ mmu-miR-203   | mmu-miR-203 ~ Fign    | Pax9 ~ Fign    |
| Pax9 ~ mmu-miR-203   | mmu-miR-203 ~ Gabrb3  | Pax9 ~ Gabrb3  |
| Pax9 ~ mmu-miR-203   | mmu-miR-203 ~ Gad2    | Pax9 ~ Gad2    |
| Pax9 ~ mmu-miR-203   | mmu-miR-203 ~ Glce    | Pax9 ~ Glce    |
| Pax9 ~ mmu-miR-203   | mmu-miR-203 ~ Ick     | Pax9 ~ Ick     |
| Pax9 ~ mmu-miR-203   | mmu-miR-203 ~ Igf2r   | Pax9 ~ Igf2r   |
| Pax9 ~ mmu-miR-203   | mmu-miR-203 ~ Mmp16   | Pax9 ~ Mmp16   |
| Pax9 ~ mmu-miR-203   | mmu-miR-203 ~ Pdgfra  | Pax9 ~ Pdgfra  |
| Pax9 ~ mmu-miR-203   | mmu-miR-203 ~ Slc32a1 | Pax9 ~ Slc32a1 |
| Pax9 ~ mmu-miR-203   | mmu-miR-203 ~ Vcan    | Pax9 ~ Vcan    |
| Pax9 ~ mmu-miR-362   | mmu-miR-362 ~ Acvr1   | Pax9 ~ Acvr1   |
| Pax9 ~ mmu-miR-362   | mmu-miR-362 ~ Cask    | Pax9 ~ Cask    |
| Pax9 ~ mmu-miR-362   | mmu-miR-362 ~ Ednrb   | Pax9 ~ Ednrb   |
| Pax9 ~ mmu-miR-362   | mmu-miR-362 ~ Eya1    | Pax9 ~ Eya1    |
| Pax9 ~ mmu-miR-362   | mmu-miR-362 ~ Gad2    | Pax9 ~ Gad2    |
| Pax9 ~ mmu-miR-362   | mmu-miR-362 ~ Grb2    | Pax9 ~ Grb2    |
| Pax9 ~ mmu-miR-362   | mmu-miR-362 ~ Loxl3   | Pax9 ~ Loxl3   |
| Pitx1 ~ mmu-miR-152  | mmu-miR-152 ~ Itga5   | Pitx1 ~ Itga5  |
| Runx1 ~ mmu-miR-152  | mmu-miR-152 ~ Col2a1  | Runx1 ~ Col2a1 |
| Runx1 ~ mmu-miR-152  | mmu-miR-152 ~ Lbr     | Runx1 ~ Lbr    |
| Runx1 ~ mmu-miR-30a  | mmu-miR-30a ~ Eya1    | Runx1 ~ Eya1   |
| Runx1 ~ mmu-miR-30a  | mmu-miR-30a ~ Inhba   | Runx1 ~ Inhba  |
| Snai2 ~ mmu-miR-200b | mmu-miR-200b ~ Eya4   | Snai2 ~ Eya4   |
| Snai2 ~ mmu-miR-22   | mmu-miR-22 ~ Tgfbr1   | Snai2 ~ Tgfbr1 |
| Snai2 ~ mmu-miR-29a  | mmu-miR-29a ~ Bmpr1a  | Snai2 ~ Bmpr1a |
| Snai2 ~ mmu-miR-29a  | mmu-miR-29a ~ Insig1  | Snai2 ~ Insig1 |
| Snai2 ~ mmu-miR-29a  | mmu-miR-29a ~ Itgb1   | Snai2 ~ Itgb1  |
| Sox2 ~ mmu-miR-302a  | mmu-miR-302a ~ Itgb8  | Sox2 ~ Itgb8   |
| Sox2 ~ mmu-miR-30a   | mmu-miR-30a ~ Eya1    | Sox2 ~ Eya1    |
| Sox2 ~ mmu-miR-367   | mmu-miR-367 ~ Plekha1 | Sox2 ~ Plekha1 |
| Sox9 ~ mmu-let-7b    | mmu-let-7b ~ Bmpr1a   | Sox9 ~ Bmpr1a  |
| Sox9 ~ mmu-let-7b    | mmu-let-7b ~ Fign     | Sox9 ~ Fign    |
| Sox9 ~ mmu-let-7b    | mmu-let-7b ~ Rspo2    | Sox9 ~ Rspo2   |
| Sox9 ~ mmu-let-7b    | mmu-let-7b ~ Tgfbr3   | Sox9 ~ Tgfbr3  |
| Sox9 ~ mmu-let-7b    | mmu-let-7b ~ Wnt9b    | Sox9 ~ Wnt9b   |
| Sox9 ~ mmu-miR-19a   | mmu-miR-19a ~ Igf2r   | Sox9 ~ Igf2r   |
| Sox9 ~ mmu-miR-19a   | mmu-miR-19a ~ Kcnj2   | Sox9 ~ Kcnj2   |
| Sox9 ~ mmu-miR-20a   | mmu-miR-20a ~ Itgb8   | Sox9 ~ Itgb8   |
| Sox9 ~ mmu-miR-20a   | mmu-miR-20a ~ Luzp1   | Sox9 ~ Luzp1   |

|                    |                      |              |
|--------------------|----------------------|--------------|
| Sox9 ~ mmu-miR-20a | mmu-miR-20a ~ Vegfa  | Sox9 ~ Vegfa |
| Sox9 ~ mmu-miR-20a | mmu-miR-20a ~ Wnt9b  | Sox9 ~ Wnt9b |
| Sox9 ~ mmu-miR-423 | mmu-miR-423 ~ Fuz    | Sox9 ~ Fuz   |
| Sp8 ~ mmu-let-7b   | mmu-let-7b ~ Bmpr1a  | Sp8 ~ Bmpr1a |
| Sp8 ~ mmu-let-7b   | mmu-let-7b ~ Cask    | Sp8 ~ Cask   |
| Sp8 ~ mmu-let-7b   | mmu-let-7b ~ Chd7    | Sp8 ~ Chd7   |
| Sp8 ~ mmu-let-7b   | mmu-let-7b ~ Chrd    | Sp8 ~ Chrd   |
| Sp8 ~ mmu-let-7b   | mmu-let-7b ~ Crk     | Sp8 ~ Crk    |
| Sp8 ~ mmu-let-7b   | mmu-let-7b ~ Edn1    | Sp8 ~ Edn1   |
| Sp8 ~ mmu-let-7b   | mmu-let-7b ~ Fign    | Sp8 ~ Fign   |
| Sp8 ~ mmu-let-7b   | mmu-let-7b ~ Lbr     | Sp8 ~ Lbr    |
| Sp8 ~ mmu-let-7b   | mmu-let-7b ~ Piga    | Sp8 ~ Piga   |
| Sp8 ~ mmu-let-7b   | mmu-let-7b ~ Tgfbr1  | Sp8 ~ Tgfbr1 |
| Sp8 ~ mmu-let-7b   | mmu-let-7b ~ Tgfbr3  | Sp8 ~ Tgfbr3 |
| Sp8 ~ mmu-let-7b   | mmu-let-7b ~ Wnt9b   | Sp8 ~ Wnt9b  |
| Sp8 ~ mmu-miR-140  | mmu-miR-140 ~ Fgf9   | Sp8 ~ Fgf9   |
| Sp8 ~ mmu-miR-140  | mmu-miR-140 ~ Hs2st1 | Sp8 ~ Hs2st1 |
| Sp8 ~ mmu-miR-140  | mmu-miR-140 ~ Nog    | Sp8 ~ Nog    |
| Sp8 ~ mmu-miR-140  | mmu-miR-140 ~ Pdgfra | Sp8 ~ Pdgfra |
| Sp8 ~ mmu-miR-140  | mmu-miR-140 ~ Rac1   | Sp8 ~ Rac1   |
| Sp8 ~ mmu-miR-140  | mmu-miR-140 ~ Tgfbr1 | Sp8 ~ Tgfbr1 |
| Sp8 ~ mmu-miR-140  | mmu-miR-140 ~ Tgfbr3 | Sp8 ~ Tgfbr3 |
| Sp8 ~ mmu-miR-140  | mmu-miR-140 ~ Vegfa  | Sp8 ~ Vegfa  |
| Sp8 ~ mmu-miR-152  | mmu-miR-152 ~ Acvr1  | Sp8 ~ Acvr1  |
| Sp8 ~ mmu-miR-152  | mmu-miR-152 ~ Chuk   | Sp8 ~ Chuk   |
| Sp8 ~ mmu-miR-152  | mmu-miR-152 ~ Col2a1 | Sp8 ~ Col2a1 |
| Sp8 ~ mmu-miR-152  | mmu-miR-152 ~ Crk    | Sp8 ~ Crk    |
| Sp8 ~ mmu-miR-152  | mmu-miR-152 ~ Dicer1 | Sp8 ~ Dicer1 |
| Sp8 ~ mmu-miR-152  | mmu-miR-152 ~ Fbxo11 | Sp8 ~ Fbxo11 |
| Sp8 ~ mmu-miR-152  | mmu-miR-152 ~ Inhbb  | Sp8 ~ Inhbb  |
| Sp8 ~ mmu-miR-152  | mmu-miR-152 ~ Itga5  | Sp8 ~ Itga5  |
| Sp8 ~ mmu-miR-152  | mmu-miR-152 ~ Itgb6  | Sp8 ~ Itgb6  |
| Sp8 ~ mmu-miR-152  | mmu-miR-152 ~ Itgb8  | Sp8 ~ Itgb8  |
| Sp8 ~ mmu-miR-152  | mmu-miR-152 ~ Lbr    | Sp8 ~ Lbr    |
| Sp8 ~ mmu-miR-152  | mmu-miR-152 ~ Nog    | Sp8 ~ Nog    |
| Sp8 ~ mmu-miR-152  | mmu-miR-152 ~ Nrp1   | Sp8 ~ Nrp1   |
| Sp8 ~ mmu-miR-152  | mmu-miR-152 ~ Sos1   | Sp8 ~ Sos1   |
| Sp8 ~ mmu-miR-152  | mmu-miR-152 ~ Tgfb2  | Sp8 ~ Tgfb2  |
| Sp8 ~ mmu-miR-152  | mmu-miR-152 ~ Tgfbr1 | Sp8 ~ Tgfbr1 |
| Sp8 ~ mmu-miR-152  | mmu-miR-152 ~ Tiparp | Sp8 ~ Tiparp |
| Sp8 ~ mmu-miR-154  | mmu-miR-154 ~ Bmpr1a | Sp8 ~ Bmpr1a |
| Sp8 ~ mmu-miR-154  | mmu-miR-154 ~ Dicer1 | Sp8 ~ Dicer1 |
| Sp8 ~ mmu-miR-17   | mmu-miR-17 ~ Crk     | Sp8 ~ Crk    |
| Sp8 ~ mmu-miR-17   | mmu-miR-17 ~ Efnb1   | Sp8 ~ Efnb1  |
| Sp8 ~ mmu-miR-17   | mmu-miR-17 ~ Fzd7    | Sp8 ~ Fzd7   |
| Sp8 ~ mmu-miR-17   | mmu-miR-17 ~ Gab1    | Sp8 ~ Gab1   |
| Sp8 ~ mmu-miR-17   | mmu-miR-17 ~ Gad2    | Sp8 ~ Gad2   |

|                    |                        |                |
|--------------------|------------------------|----------------|
| Sp8 ~ mmu-miR-17   | mmu-miR-17 ~ Hs2st1    | Sp8 ~ Hs2st1   |
| Sp8 ~ mmu-miR-17   | mmu-miR-17 ~ Ift88     | Sp8 ~ Ift88    |
| Sp8 ~ mmu-miR-17   | mmu-miR-17 ~ Itgb8     | Sp8 ~ Itgb8    |
| Sp8 ~ mmu-miR-17   | mmu-miR-17 ~ Luzp1     | Sp8 ~ Luzp1    |
| Sp8 ~ mmu-miR-17   | mmu-miR-17 ~ Pdgfra    | Sp8 ~ Pdgfra   |
| Sp8 ~ mmu-miR-17   | mmu-miR-17 ~ Smoc1     | Sp8 ~ Smoc1    |
| Sp8 ~ mmu-miR-17   | mmu-miR-17 ~ Sos1      | Sp8 ~ Sos1     |
| Sp8 ~ mmu-miR-17   | mmu-miR-17 ~ Tgfbr2    | Sp8 ~ Tgfbr2   |
| Sp8 ~ mmu-miR-17   | mmu-miR-17 ~ Vegfa     | Sp8 ~ Vegfa    |
| Sp8 ~ mmu-miR-17   | mmu-miR-17 ~ Wnt9b     | Sp8 ~ Wnt9b    |
| Sp8 ~ mmu-miR-188  | mmu-miR-188 ~ Ctnnbip1 | Sp8 ~ Ctnnbip1 |
| Sp8 ~ mmu-miR-188  | mmu-miR-188 ~ Fbxo11   | Sp8 ~ Fbxo11   |
| Sp8 ~ mmu-miR-188  | mmu-miR-188 ~ Sos1     | Sp8 ~ Sos1     |
| Sp8 ~ mmu-miR-18a  | mmu-miR-18a ~ Ap2b1    | Sp8 ~ Ap2b1    |
| Sp8 ~ mmu-miR-18a  | mmu-miR-18a ~ Cdc42    | Sp8 ~ Cdc42    |
| Sp8 ~ mmu-miR-18a  | mmu-miR-18a ~ Ctgf     | Sp8 ~ Ctgf     |
| Sp8 ~ mmu-miR-18a  | mmu-miR-18a ~ Gab1     | Sp8 ~ Gab1     |
| Sp8 ~ mmu-miR-18a  | mmu-miR-18a ~ Mapk1    | Sp8 ~ Mapk1    |
| Sp8 ~ mmu-miR-193b | mmu-miR-193b ~ Ap2b1   | Sp8 ~ Ap2b1    |
| Sp8 ~ mmu-miR-193b | mmu-miR-193b ~ Dlg1    | Sp8 ~ Dlg1     |
| Sp8 ~ mmu-miR-193b | mmu-miR-193b ~ Kcnj2   | Sp8 ~ Kcnj2    |
| Sp8 ~ mmu-miR-193b | mmu-miR-193b ~ Mmp14   | Sp8 ~ Mmp14    |
| Sp8 ~ mmu-miR-193b | mmu-miR-193b ~ Ptpnf   | Sp8 ~ Ptpnf    |
| Sp8 ~ mmu-miR-193b | mmu-miR-193b ~ Tgfb2   | Sp8 ~ Tgfb2    |
| Sp8 ~ mmu-miR-193b | mmu-miR-193b ~ Tgfbr3  | Sp8 ~ Tgfbr3   |
| Sp8 ~ mmu-miR-19a  | mmu-miR-19a ~ Apaf1    | Sp8 ~ Apaf1    |
| Sp8 ~ mmu-miR-19a  | mmu-miR-19a ~ Ctgf     | Sp8 ~ Ctgf     |
| Sp8 ~ mmu-miR-19a  | mmu-miR-19a ~ Dicer1   | Sp8 ~ Dicer1   |
| Sp8 ~ mmu-miR-19a  | mmu-miR-19a ~ Dlg1     | Sp8 ~ Dlg1     |
| Sp8 ~ mmu-miR-19a  | mmu-miR-19a ~ Ephb3    | Sp8 ~ Ephb3    |
| Sp8 ~ mmu-miR-19a  | mmu-miR-19a ~ Fgf10    | Sp8 ~ Fgf10    |
| Sp8 ~ mmu-miR-19a  | mmu-miR-19a ~ Igf2r    | Sp8 ~ Igf2r    |
| Sp8 ~ mmu-miR-19a  | mmu-miR-19a ~ Inhbb    | Sp8 ~ Inhbb    |
| Sp8 ~ mmu-miR-19a  | mmu-miR-19a ~ Kcnj2    | Sp8 ~ Kcnj2    |
| Sp8 ~ mmu-miR-19a  | mmu-miR-19a ~ Kif3a    | Sp8 ~ Kif3a    |
| Sp8 ~ mmu-miR-19a  | mmu-miR-19a ~ Lrp6     | Sp8 ~ Lrp6     |
| Sp8 ~ mmu-miR-19a  | mmu-miR-19a ~ Mapk1    | Sp8 ~ Mapk1    |
| Sp8 ~ mmu-miR-19a  | mmu-miR-19a ~ Smoc1    | Sp8 ~ Smoc1    |
| Sp8 ~ mmu-miR-19a  | mmu-miR-19a ~ Tgfbr2   | Sp8 ~ Tgfbr2   |
| Sp8 ~ mmu-miR-203  | mmu-miR-203 ~ Acvr2a   | Sp8 ~ Acvr2a   |
| Sp8 ~ mmu-miR-203  | mmu-miR-203 ~ Ap2b1    | Sp8 ~ Ap2b1    |
| Sp8 ~ mmu-miR-203  | mmu-miR-203 ~ Bmi1     | Sp8 ~ Bmi1     |
| Sp8 ~ mmu-miR-203  | mmu-miR-203 ~ Cask     | Sp8 ~ Cask     |
| Sp8 ~ mmu-miR-203  | mmu-miR-203 ~ Crk      | Sp8 ~ Crk      |
| Sp8 ~ mmu-miR-203  | mmu-miR-203 ~ Dlg1     | Sp8 ~ Dlg1     |
| Sp8 ~ mmu-miR-203  | mmu-miR-203 ~ Edn1     | Sp8 ~ Edn1     |
| Sp8 ~ mmu-miR-203  | mmu-miR-203 ~ Eya1     | Sp8 ~ Eya1     |

|                   |                       |               |
|-------------------|-----------------------|---------------|
| Sp8 ~ mmu-miR-203 | mmu-miR-203 ~ Eya4    | Sp8 ~ Eya4    |
| Sp8 ~ mmu-miR-203 | mmu-miR-203 ~ Fbxo11  | Sp8 ~ Fbxo11  |
| Sp8 ~ mmu-miR-203 | mmu-miR-203 ~ Fign    | Sp8 ~ Fign    |
| Sp8 ~ mmu-miR-203 | mmu-miR-203 ~ Gabrb3  | Sp8 ~ Gabrb3  |
| Sp8 ~ mmu-miR-203 | mmu-miR-203 ~ Gad2    | Sp8 ~ Gad2    |
| Sp8 ~ mmu-miR-203 | mmu-miR-203 ~ Glce    | Sp8 ~ Glce    |
| Sp8 ~ mmu-miR-203 | mmu-miR-203 ~ Ick     | Sp8 ~ Ick     |
| Sp8 ~ mmu-miR-203 | mmu-miR-203 ~ Igf2r   | Sp8 ~ Igf2r   |
| Sp8 ~ mmu-miR-203 | mmu-miR-203 ~ Insig1  | Sp8 ~ Insig1  |
| Sp8 ~ mmu-miR-203 | mmu-miR-203 ~ Mmp16   | Sp8 ~ Mmp16   |
| Sp8 ~ mmu-miR-203 | mmu-miR-203 ~ Nrp1    | Sp8 ~ Nrp1    |
| Sp8 ~ mmu-miR-203 | mmu-miR-203 ~ Pdgfra  | Sp8 ~ Pdgfra  |
| Sp8 ~ mmu-miR-203 | mmu-miR-203 ~ Shh     | Sp8 ~ Shh     |
| Sp8 ~ mmu-miR-203 | mmu-miR-203 ~ Slc32a1 | Sp8 ~ Slc32a1 |
| Sp8 ~ mmu-miR-203 | mmu-miR-203 ~ Trp63   | Sp8 ~ Trp63   |
| Sp8 ~ mmu-miR-203 | mmu-miR-203 ~ Vcan    | Sp8 ~ Vcan    |
| Sp8 ~ mmu-miR-203 | mmu-miR-203 ~ Vegfa   | Sp8 ~ Vegfa   |
| Sp8 ~ mmu-miR-203 | mmu-miR-203 ~ Wls     | Sp8 ~ Wls     |
| Sp8 ~ mmu-miR-206 | mmu-miR-206 ~ Cask    | Sp8 ~ Cask    |
| Sp8 ~ mmu-miR-206 | mmu-miR-206 ~ Cdc42   | Sp8 ~ Cdc42   |
| Sp8 ~ mmu-miR-206 | mmu-miR-206 ~ Cyp26b1 | Sp8 ~ Cyp26b1 |
| Sp8 ~ mmu-miR-206 | mmu-miR-206 ~ Dlg1    | Sp8 ~ Dlg1    |
| Sp8 ~ mmu-miR-206 | mmu-miR-206 ~ Edn1    | Sp8 ~ Edn1    |
| Sp8 ~ mmu-miR-206 | mmu-miR-206 ~ Eya4    | Sp8 ~ Eya4    |
| Sp8 ~ mmu-miR-206 | mmu-miR-206 ~ Fzd7    | Sp8 ~ Fzd7    |
| Sp8 ~ mmu-miR-206 | mmu-miR-206 ~ Kcnj2   | Sp8 ~ Kcnj2   |
| Sp8 ~ mmu-miR-206 | mmu-miR-206 ~ Luzp1   | Sp8 ~ Luzp1   |
| Sp8 ~ mmu-miR-206 | mmu-miR-206 ~ Mapk3   | Sp8 ~ Mapk3   |
| Sp8 ~ mmu-miR-206 | mmu-miR-206 ~ Phc2    | Sp8 ~ Phc2    |
| Sp8 ~ mmu-miR-206 | mmu-miR-206 ~ Tgfbr3  | Sp8 ~ Tgfbr3  |
| Sp8 ~ mmu-miR-206 | mmu-miR-206 ~ Vegfa   | Sp8 ~ Vegfa   |
| Sp8 ~ mmu-miR-20a | mmu-miR-20a ~ Crk     | Sp8 ~ Crk     |
| Sp8 ~ mmu-miR-20a | mmu-miR-20a ~ Efnb1   | Sp8 ~ Efnb1   |
| Sp8 ~ mmu-miR-20a | mmu-miR-20a ~ Gab1    | Sp8 ~ Gab1    |
| Sp8 ~ mmu-miR-20a | mmu-miR-20a ~ Gad2    | Sp8 ~ Gad2    |
| Sp8 ~ mmu-miR-20a | mmu-miR-20a ~ Hs2st1  | Sp8 ~ Hs2st1  |
| Sp8 ~ mmu-miR-20a | mmu-miR-20a ~ Itgb8   | Sp8 ~ Itgb8   |
| Sp8 ~ mmu-miR-20a | mmu-miR-20a ~ Luzp1   | Sp8 ~ Luzp1   |
| Sp8 ~ mmu-miR-20a | mmu-miR-20a ~ Pdgfra  | Sp8 ~ Pdgfra  |
| Sp8 ~ mmu-miR-20a | mmu-miR-20a ~ Smoc1   | Sp8 ~ Smoc1   |
| Sp8 ~ mmu-miR-20a | mmu-miR-20a ~ Sos1    | Sp8 ~ Sos1    |
| Sp8 ~ mmu-miR-20a | mmu-miR-20a ~ Tgfbr2  | Sp8 ~ Tgfbr2  |
| Sp8 ~ mmu-miR-20a | mmu-miR-20a ~ Vegfa   | Sp8 ~ Vegfa   |
| Sp8 ~ mmu-miR-20a | mmu-miR-20a ~ Wnt9b   | Sp8 ~ Wnt9b   |
| Sp8 ~ mmu-miR-22  | mmu-miR-22 ~ Fgfr1    | Sp8 ~ Fgfr1   |
| Sp8 ~ mmu-miR-22  | mmu-miR-22 ~ Fgfr2    | Sp8 ~ Fgfr2   |
| Sp8 ~ mmu-miR-22  | mmu-miR-22 ~ Hspg2    | Sp8 ~ Hspg2   |

|                    |                        |                |
|--------------------|------------------------|----------------|
| Sp8 ~ mmu-miR-22   | mmu-miR-22 ~ Tgfbr1    | Sp8 ~ Tgfbr1   |
| Sp8 ~ mmu-miR-29a  | mmu-miR-29a ~ Acvr2a   | Sp8 ~ Acvr2a   |
| Sp8 ~ mmu-miR-29a  | mmu-miR-29a ~ Adamts20 | Sp8 ~ Adamts20 |
| Sp8 ~ mmu-miR-29a  | mmu-miR-29a ~ Adamts9  | Sp8 ~ Adamts9  |
| Sp8 ~ mmu-miR-29a  | mmu-miR-29a ~ Bmpr1a   | Sp8 ~ Bmpr1a   |
| Sp8 ~ mmu-miR-29a  | mmu-miR-29a ~ Cdc42    | Sp8 ~ Cdc42    |
| Sp8 ~ mmu-miR-29a  | mmu-miR-29a ~ Col11a1  | Sp8 ~ Col11a1  |
| Sp8 ~ mmu-miR-29a  | mmu-miR-29a ~ Col2a1   | Sp8 ~ Col2a1   |
| Sp8 ~ mmu-miR-29a  | mmu-miR-29a ~ Ctnnb1   | Sp8 ~ Ctnnb1   |
| Sp8 ~ mmu-miR-29a  | mmu-miR-29a ~ Ctnnbip1 | Sp8 ~ Ctnnbip1 |
| Sp8 ~ mmu-miR-29a  | mmu-miR-29a ~ Dicer1   | Sp8 ~ Dicer1   |
| Sp8 ~ mmu-miR-29a  | mmu-miR-29a ~ Efna5    | Sp8 ~ Efna5    |
| Sp8 ~ mmu-miR-29a  | mmu-miR-29a ~ Ephb3    | Sp8 ~ Ephb3    |
| Sp8 ~ mmu-miR-29a  | mmu-miR-29a ~ Fign     | Sp8 ~ Fign     |
| Sp8 ~ mmu-miR-29a  | mmu-miR-29a ~ Gab1     | Sp8 ~ Gab1     |
| Sp8 ~ mmu-miR-29a  | mmu-miR-29a ~ Gsk3b    | Sp8 ~ Gsk3b    |
| Sp8 ~ mmu-miR-29a  | mmu-miR-29a ~ Insig1   | Sp8 ~ Insig1   |
| Sp8 ~ mmu-miR-29a  | mmu-miR-29a ~ Itgb1    | Sp8 ~ Itgb1    |
| Sp8 ~ mmu-miR-29a  | mmu-miR-29a ~ Lims1    | Sp8 ~ Lims1    |
| Sp8 ~ mmu-miR-29a  | mmu-miR-29a ~ Luzp1    | Sp8 ~ Luzp1    |
| Sp8 ~ mmu-miR-29a  | mmu-miR-29a ~ Mmp16    | Sp8 ~ Mmp16    |
| Sp8 ~ mmu-miR-29a  | mmu-miR-29a ~ Pdgfc    | Sp8 ~ Pdgfc    |
| Sp8 ~ mmu-miR-29a  | mmu-miR-29a ~ Pdgfrb   | Sp8 ~ Pdgfrb   |
| Sp8 ~ mmu-miR-29a  | mmu-miR-29a ~ Phc1     | Sp8 ~ Phc1     |
| Sp8 ~ mmu-miR-29a  | mmu-miR-29a ~ Plekha1  | Sp8 ~ Plekha1  |
| Sp8 ~ mmu-miR-29a  | mmu-miR-29a ~ Ptpn11   | Sp8 ~ Ptpn11   |
| Sp8 ~ mmu-miR-29a  | mmu-miR-29a ~ Schip1   | Sp8 ~ Schip1   |
| Sp8 ~ mmu-miR-29a  | mmu-miR-29a ~ Spry1    | Sp8 ~ Spry1    |
| Sp8 ~ mmu-miR-29a  | mmu-miR-29a ~ Tgfb2    | Sp8 ~ Tgfb2    |
| Sp8 ~ mmu-miR-29a  | mmu-miR-29a ~ Vegfa    | Sp8 ~ Vegfa    |
| Sp8 ~ mmu-miR-302a | mmu-miR-302a ~ Adamts9 | Sp8 ~ Adamts9  |
| Sp8 ~ mmu-miR-302a | mmu-miR-302a ~ Crk     | Sp8 ~ Crk      |
| Sp8 ~ mmu-miR-302a | mmu-miR-302a ~ Ednrb   | Sp8 ~ Ednrb    |
| Sp8 ~ mmu-miR-302a | mmu-miR-302a ~ Fbxo11  | Sp8 ~ Fbxo11   |
| Sp8 ~ mmu-miR-302a | mmu-miR-302a ~ Fgf10   | Sp8 ~ Fgf10    |
| Sp8 ~ mmu-miR-302a | mmu-miR-302a ~ Gad2    | Sp8 ~ Gad2     |
| Sp8 ~ mmu-miR-302a | mmu-miR-302a ~ Gsk3b   | Sp8 ~ Gsk3b    |
| Sp8 ~ mmu-miR-302a | mmu-miR-302a ~ Hs2st1  | Sp8 ~ Hs2st1   |
| Sp8 ~ mmu-miR-302a | mmu-miR-302a ~ Inhbb   | Sp8 ~ Inhbb    |
| Sp8 ~ mmu-miR-302a | mmu-miR-302a ~ Itgb8   | Sp8 ~ Itgb8    |
| Sp8 ~ mmu-miR-302a | mmu-miR-302a ~ Rad23b  | Sp8 ~ Rad23b   |
| Sp8 ~ mmu-miR-302a | mmu-miR-302a ~ Tgfbr1  | Sp8 ~ Tgfbr1   |
| Sp8 ~ mmu-miR-302a | mmu-miR-302a ~ Tgfbr2  | Sp8 ~ Tgfbr2   |
| Sp8 ~ mmu-miR-302a | mmu-miR-302a ~ Tiparp  | Sp8 ~ Tiparp   |
| Sp8 ~ mmu-miR-302a | mmu-miR-302a ~ Vegfa   | Sp8 ~ Vegfa    |
| Sp8 ~ mmu-miR-302a | mmu-miR-302a ~ Wnt9b   | Sp8 ~ Wnt9b    |
| Sp8 ~ mmu-miR-362  | mmu-miR-362 ~ Acvr1    | Sp8 ~ Acvr1    |

|                      |                       |                 |
|----------------------|-----------------------|-----------------|
| Sp8 ~ mmu-miR-362    | mmu-miR-362 ~ Adamts9 | Sp8 ~ Adamts9   |
| Sp8 ~ mmu-miR-362    | mmu-miR-362 ~ Akap8   | Sp8 ~ Akap8     |
| Sp8 ~ mmu-miR-362    | mmu-miR-362 ~ Cask    | Sp8 ~ Cask      |
| Sp8 ~ mmu-miR-362    | mmu-miR-362 ~ Chd7    | Sp8 ~ Chd7      |
| Sp8 ~ mmu-miR-362    | mmu-miR-362 ~ Ednrb   | Sp8 ~ Ednrb     |
| Sp8 ~ mmu-miR-362    | mmu-miR-362 ~ Eya1    | Sp8 ~ Eya1      |
| Sp8 ~ mmu-miR-362    | mmu-miR-362 ~ Gad2    | Sp8 ~ Gad2      |
| Sp8 ~ mmu-miR-362    | mmu-miR-362 ~ Grb2    | Sp8 ~ Grb2      |
| Sp8 ~ mmu-miR-362    | mmu-miR-362 ~ Gsk3b   | Sp8 ~ Gsk3b     |
| Sp8 ~ mmu-miR-362    | mmu-miR-362 ~ Inhbb   | Sp8 ~ Inhbb     |
| Sp8 ~ mmu-miR-362    | mmu-miR-362 ~ Insig2  | Sp8 ~ Insig2    |
| Sp8 ~ mmu-miR-362    | mmu-miR-362 ~ Lbr     | Sp8 ~ Lbr       |
| Sp8 ~ mmu-miR-362    | mmu-miR-362 ~ Loxl3   | Sp8 ~ Loxl3     |
| Sp8 ~ mmu-miR-367    | mmu-miR-367 ~ Cask    | Sp8 ~ Cask      |
| Sp8 ~ mmu-miR-367    | mmu-miR-367 ~ Cdkn1c  | Sp8 ~ Cdkn1c    |
| Sp8 ~ mmu-miR-367    | mmu-miR-367 ~ Coll1a1 | Sp8 ~ Coll1a1   |
| Sp8 ~ mmu-miR-367    | mmu-miR-367 ~ Fst     | Sp8 ~ Fst       |
| Sp8 ~ mmu-miR-367    | mmu-miR-367 ~ Ick     | Sp8 ~ Ick       |
| Sp8 ~ mmu-miR-367    | mmu-miR-367 ~ Insig1  | Sp8 ~ Insig1    |
| Sp8 ~ mmu-miR-367    | mmu-miR-367 ~ Itga5   | Sp8 ~ Itga5     |
| Sp8 ~ mmu-miR-367    | mmu-miR-367 ~ Itgav   | Sp8 ~ Itgav     |
| Sp8 ~ mmu-miR-367    | mmu-miR-367 ~ Luzp1   | Sp8 ~ Luzp1     |
| Sp8 ~ mmu-miR-367    | mmu-miR-367 ~ Mmp16   | Sp8 ~ Mmp16     |
| Sp8 ~ mmu-miR-367    | mmu-miR-367 ~ Pds5b   | Sp8 ~ Pds5b     |
| Sp8 ~ mmu-miR-367    | mmu-miR-367 ~ Pkdec   | Sp8 ~ Pkdec     |
| Sp8 ~ mmu-miR-367    | mmu-miR-367 ~ Plekha1 | Sp8 ~ Plekha1   |
| Sp8 ~ mmu-miR-367    | mmu-miR-367 ~ Slc12a5 | Sp8 ~ Slc12a5   |
| Sp8 ~ mmu-miR-367    | mmu-miR-367 ~ Slc32a1 | Sp8 ~ Slc32a1   |
| Sp8 ~ mmu-miR-369    | mmu-miR-369 ~ Cask    | Sp8 ~ Cask      |
| Sp8 ~ mmu-miR-369    | mmu-miR-369 ~ Crk     | Sp8 ~ Crk       |
| Sp8 ~ mmu-miR-369    | mmu-miR-369 ~ Eya1    | Sp8 ~ Eya1      |
| Sp8 ~ mmu-miR-369    | mmu-miR-369 ~ Gabrb3  | Sp8 ~ Gabrb3    |
| Sp8 ~ mmu-miR-369    | mmu-miR-369 ~ Gsk3b   | Sp8 ~ Gsk3b     |
| Sp8 ~ mmu-miR-369    | mmu-miR-369 ~ Inhbb   | Sp8 ~ Inhbb     |
| Sp8 ~ mmu-miR-369    | mmu-miR-369 ~ Nog     | Sp8 ~ Nog       |
| Sp8 ~ mmu-miR-423    | mmu-miR-423 ~ Fuz     | Sp8 ~ Fuz       |
| Sp8 ~ mmu-miR-452    | mmu-miR-452 ~ Ephb3   | Sp8 ~ Ephb3     |
| Sp8 ~ mmu-miR-452    | mmu-miR-452 ~ Lrp6    | Sp8 ~ Lrp6      |
| Twist1 ~ mmu-miR-140 | mmu-miR-140 ~ Fgf9    | Twist1 ~ Fgf9   |
| Twist1 ~ mmu-miR-140 | mmu-miR-140 ~ Pdgfra  | Twist1 ~ Pdgfra |
| Zeb1 ~ mmu-miR-140   | mmu-miR-140 ~ Fgf9    | Zeb1 ~ Fgf9     |
| Zeb1 ~ mmu-miR-140   | mmu-miR-140 ~ Rac1    | Zeb1 ~ Rac1     |
| Zeb1 ~ mmu-miR-200b  | mmu-miR-200b ~ Apaf1  | Zeb1 ~ Apaf1    |
| Zeb1 ~ mmu-miR-200b  | mmu-miR-200b ~ Bmi1   | Zeb1 ~ Bmi1     |
| Zeb1 ~ mmu-miR-200b  | mmu-miR-200b ~ Piga   | Zeb1 ~ Piga     |
| Zeb1 ~ mmu-miR-200b  | mmu-miR-200b ~ Rac1   | Zeb1 ~ Rac1     |
| Zeb1 ~ mmu-miR-203   | mmu-miR-203 ~ Bmi1    | Zeb1 ~ Bmi1     |

|                    |                       |                |
|--------------------|-----------------------|----------------|
| Zeb1 ~ mmu-miR-203 | mmu-miR-203 ~ Cask    | Zeb1 ~ Cask    |
| Zeb1 ~ mmu-miR-203 | mmu-miR-203 ~ Crk     | Zeb1 ~ Crk     |
| Zeb1 ~ mmu-miR-203 | mmu-miR-203 ~ Dlg1    | Zeb1 ~ Dlg1    |
| Zeb1 ~ mmu-miR-203 | mmu-miR-203 ~ Eya1    | Zeb1 ~ Eya1    |
| Zeb1 ~ mmu-miR-203 | mmu-miR-203 ~ Gabrb3  | Zeb1 ~ Gabrb3  |
| Zeb1 ~ mmu-miR-203 | mmu-miR-203 ~ Ick     | Zeb1 ~ Ick     |
| Zeb1 ~ mmu-miR-203 | mmu-miR-203 ~ Shh     | Zeb1 ~ Shh     |
| Zeb1 ~ mmu-miR-203 | mmu-miR-203 ~ Slc32a1 | Zeb1 ~ Slc32a1 |
| Zeb1 ~ mmu-miR-203 | mmu-miR-203 ~ Trp63   | Zeb1 ~ Trp63   |
| Zeb1 ~ mmu-miR-203 | mmu-miR-203 ~ Wls     | Zeb1 ~ Wls     |

**Table S7.** Mouse cleft palate related miRNA-TF-gene type II motifs.

| <b>miRNA-TF pair</b> | <b>TF-Gene pair</b> | <b>miRNA-Gene pair</b> |
|----------------------|---------------------|------------------------|
| mmu-miR-200b ~ Alx1  | Alx1 ~ Pdgfra       | mmu-miR-200b ~ Pdgfra  |
| mmu-miR-206 ~ Alx1   | Alx1 ~ Cyp26b1      | mmu-miR-206 ~ Cyp26b1  |
| mmu-miR-17 ~ Alx4    | Alx4 ~ Pdgfra       | mmu-miR-17 ~ Pdgfra    |
| mmu-miR-20a ~ Alx4   | Alx4 ~ Pdgfra       | mmu-miR-20a ~ Pdgfra   |
| mmu-miR-133a ~ Foxc2 | Foxc2 ~ Ctgf        | mmu-miR-133a ~ Ctgf    |
| mmu-miR-133b ~ Foxc2 | Foxc2 ~ Ctgf        | mmu-miR-133b ~ Ctgf    |
| mmu-miR-19a ~ Foxf2  | Foxf2 ~ Apaf1       | mmu-miR-19a ~ Apaf1    |
| mmu-miR-19a ~ Foxf2  | Foxf2 ~ Ctgf        | mmu-miR-19a ~ Ctgf     |
| mmu-miR-19a ~ Foxf2  | Foxf2 ~ Dicer1      | mmu-miR-19a ~ Dicer1   |
| mmu-miR-19a ~ Foxf2  | Foxf2 ~ Dlg1        | mmu-miR-19a ~ Dlg1     |
| mmu-miR-19a ~ Foxf2  | Foxf2 ~ Ephb3       | mmu-miR-19a ~ Ephb3    |
| mmu-miR-19a ~ Foxf2  | Foxf2 ~ Fgf10       | mmu-miR-19a ~ Fgf10    |
| mmu-miR-19a ~ Foxf2  | Foxf2 ~ Igf2r       | mmu-miR-19a ~ Igf2r    |
| mmu-miR-19a ~ Foxf2  | Foxf2 ~ Kcnj2       | mmu-miR-19a ~ Kcnj2    |
| mmu-miR-19a ~ Foxf2  | Foxf2 ~ Kif3a       | mmu-miR-19a ~ Kif3a    |
| mmu-miR-19a ~ Foxf2  | Foxf2 ~ Lrp6        | mmu-miR-19a ~ Lrp6     |
| mmu-miR-19a ~ Foxf2  | Foxf2 ~ Mapk1       | mmu-miR-19a ~ Mapk1    |
| mmu-miR-19a ~ Foxf2  | Foxf2 ~ Tgfbr2      | mmu-miR-19a ~ Tgfbr2   |
| mmu-miR-19b ~ Foxf2  | Foxf2 ~ Apaf1       | mmu-miR-19b ~ Apaf1    |
| mmu-miR-19b ~ Foxf2  | Foxf2 ~ Ctgf        | mmu-miR-19b ~ Ctgf     |
| mmu-miR-19b ~ Foxf2  | Foxf2 ~ Dicer1      | mmu-miR-19b ~ Dicer1   |
| mmu-miR-19b ~ Foxf2  | Foxf2 ~ Dlg1        | mmu-miR-19b ~ Dlg1     |
| mmu-miR-19b ~ Foxf2  | Foxf2 ~ Ephb3       | mmu-miR-19b ~ Ephb3    |
| mmu-miR-19b ~ Foxf2  | Foxf2 ~ Fgf10       | mmu-miR-19b ~ Fgf10    |
| mmu-miR-19b ~ Foxf2  | Foxf2 ~ Igf2r       | mmu-miR-19b ~ Igf2r    |
| mmu-miR-19b ~ Foxf2  | Foxf2 ~ Kcnj2       | mmu-miR-19b ~ Kcnj2    |
| mmu-miR-19b ~ Foxf2  | Foxf2 ~ Kif3a       | mmu-miR-19b ~ Kif3a    |
| mmu-miR-19b ~ Foxf2  | Foxf2 ~ Mapk1       | mmu-miR-19b ~ Mapk1    |
| mmu-miR-19b ~ Foxf2  | Foxf2 ~ Tgfbr2      | mmu-miR-19b ~ Tgfbr2   |
| mmu-miR-200b ~ Foxf2 | Foxf2 ~ Acvr2a      | mmu-miR-200b ~ Acvr2a  |
| mmu-miR-200b ~ Foxf2 | Foxf2 ~ Apaf1       | mmu-miR-200b ~ Apaf1   |
| mmu-miR-200b ~ Foxf2 | Foxf2 ~ Bmi1        | mmu-miR-200b ~ Bmi1    |
| mmu-miR-200b ~ Foxf2 | Foxf2 ~ Eya4        | mmu-miR-200b ~ Eya4    |
| mmu-miR-200b ~ Foxf2 | Foxf2 ~ Fgf10       | mmu-miR-200b ~ Fgf10   |
| mmu-miR-200b ~ Foxf2 | Foxf2 ~ Impad1      | mmu-miR-200b ~ Impad1  |
| mmu-miR-200b ~ Foxf2 | Foxf2 ~ Mdm4        | mmu-miR-200b ~ Mdm4    |
| mmu-miR-200b ~ Foxf2 | Foxf2 ~ Pdgfra      | mmu-miR-200b ~ Pdgfra  |
| mmu-miR-200b ~ Foxf2 | Foxf2 ~ Pds5b       | mmu-miR-200b ~ Pds5b   |
| mmu-miR-200b ~ Foxf2 | Foxf2 ~ Piga        | mmu-miR-200b ~ Piga    |
| mmu-miR-200b ~ Foxf2 | Foxf2 ~ Rac1        | mmu-miR-200b ~ Rac1    |
| mmu-miR-200b ~ Foxf2 | Foxf2 ~ Schip1      | mmu-miR-200b ~ Schip1  |
| mmu-miR-200b ~ Foxf2 | Foxf2 ~ Vegfa       | mmu-miR-200b ~ Vegfa   |



|                      |                 |                        |
|----------------------|-----------------|------------------------|
| mmu-miR-302a ~ Foxf2 | Foxf2 ~ Adamts9 | mmu-miR-302a ~ Adamts9 |
| mmu-miR-302a ~ Foxf2 | Foxf2 ~ Ednrb   | mmu-miR-302a ~ Ednrb   |
| mmu-miR-302a ~ Foxf2 | Foxf2 ~ Fgf10   | mmu-miR-302a ~ Fgf10   |
| mmu-miR-302a ~ Foxf2 | Foxf2 ~ Gad2    | mmu-miR-302a ~ Gad2    |
| mmu-miR-302a ~ Foxf2 | Foxf2 ~ Gsk3b   | mmu-miR-302a ~ Gsk3b   |
| mmu-miR-302a ~ Foxf2 | Foxf2 ~ Rad23b  | mmu-miR-302a ~ Rad23b  |
| mmu-miR-302a ~ Foxf2 | Foxf2 ~ Tgfbr1  | mmu-miR-302a ~ Tgfbr1  |
| mmu-miR-302a ~ Foxf2 | Foxf2 ~ Tgfbr2  | mmu-miR-302a ~ Tgfbr2  |
| mmu-miR-302a ~ Foxf2 | Foxf2 ~ Tiparp  | mmu-miR-302a ~ Tiparp  |
| mmu-miR-302a ~ Foxf2 | Foxf2 ~ Vegfa   | mmu-miR-302a ~ Vegfa   |
| mmu-miR-362 ~ Foxf2  | Foxf2 ~ Acvr1   | mmu-miR-362 ~ Acvr1    |
| mmu-miR-362 ~ Foxf2  | Foxf2 ~ Adamts9 | mmu-miR-362 ~ Adamts9  |
| mmu-miR-362 ~ Foxf2  | Foxf2 ~ Akap8   | mmu-miR-362 ~ Akap8    |
| mmu-miR-362 ~ Foxf2  | Foxf2 ~ Cask    | mmu-miR-362 ~ Cask     |
| mmu-miR-362 ~ Foxf2  | Foxf2 ~ Chd7    | mmu-miR-362 ~ Chd7     |
| mmu-miR-362 ~ Foxf2  | Foxf2 ~ Ednrb   | mmu-miR-362 ~ Ednrb    |
| mmu-miR-362 ~ Foxf2  | Foxf2 ~ Eya1    | mmu-miR-362 ~ Eya1     |
| mmu-miR-362 ~ Foxf2  | Foxf2 ~ Gad2    | mmu-miR-362 ~ Gad2     |
| mmu-miR-362 ~ Foxf2  | Foxf2 ~ Grb2    | mmu-miR-362 ~ Grb2     |
| mmu-miR-362 ~ Foxf2  | Foxf2 ~ Gsk3b   | mmu-miR-362 ~ Gsk3b    |
| mmu-miR-362 ~ Foxf2  | Foxf2 ~ Insig2  | mmu-miR-362 ~ Insig2   |
| mmu-miR-30a ~ Gli2   | Gli2 ~ Apaf1    | mmu-miR-30a ~ Apaf1    |
| mmu-miR-30a ~ Gli2   | Gli2 ~ Fst      | mmu-miR-30a ~ Fst      |
| mmu-miR-30a ~ Gli2   | Gli2 ~ Rad23b   | mmu-miR-30a ~ Rad23b   |
| mmu-miR-30a ~ Gli2   | Gli2 ~ Sos1     | mmu-miR-30a ~ Sos1     |
| mmu-miR-200b ~ Gli3  | Gli3 ~ Schip1   | mmu-miR-200b ~ Schip1  |
| mmu-miR-203 ~ Gli3   | Gli3 ~ Ick      | mmu-miR-203 ~ Ick      |
| mmu-miR-203 ~ Gli3   | Gli3 ~ Wls      | mmu-miR-203 ~ Wls      |
| mmu-miR-367 ~ Hand1  | Hand1 ~ Itga5   | mmu-miR-367 ~ Itga5    |
| mmu-miR-367 ~ Hand1  | Hand1 ~ Plekha1 | mmu-miR-367 ~ Plekha1  |
| mmu-miR-92a ~ Hand1  | Hand1 ~ Itga5   | mmu-miR-92a ~ Itga5    |
| mmu-miR-92a ~ Hand1  | Hand1 ~ Plekha1 | mmu-miR-92a ~ Plekha1  |
| mmu-miR-140 ~ Hand2  | Hand2 ~ Fgf9    | mmu-miR-140 ~ Fgf9     |
| mmu-miR-140 ~ Hand2  | Hand2 ~ Pdgfra  | mmu-miR-140 ~ Pdgfra   |
| mmu-miR-203 ~ Hand2  | Hand2 ~ Bmi1    | mmu-miR-203 ~ Bmi1     |
| mmu-miR-203 ~ Hand2  | Hand2 ~ Gabrb3  | mmu-miR-203 ~ Gabrb3   |
| mmu-miR-203 ~ Hand2  | Hand2 ~ Pdgfra  | mmu-miR-203 ~ Pdgfra   |
| mmu-miR-206 ~ Hand2  | Hand2 ~ Phc2    | mmu-miR-206 ~ Phc2     |
| mmu-miR-367 ~ Hand2  | Hand2 ~ Itga5   | mmu-miR-367 ~ Itga5    |
| mmu-miR-367 ~ Hand2  | Hand2 ~ Plekha1 | mmu-miR-367 ~ Plekha1  |
| mmu-miR-92a ~ Hand2  | Hand2 ~ Itga5   | mmu-miR-92a ~ Itga5    |
| mmu-miR-92a ~ Hand2  | Hand2 ~ Plekha1 | mmu-miR-92a ~ Plekha1  |
| mmu-miR-19a ~ Hic1   | Hic1 ~ Tgfbr2   | mmu-miR-19a ~ Tgfbr2   |
| mmu-miR-19b ~ Hic1   | Hic1 ~ Tgfbr2   | mmu-miR-19b ~ Tgfbr2   |

|                     |                |                       |
|---------------------|----------------|-----------------------|
| mmu-miR-30a ~ Lhx8  | Lhx8 ~ Fign    | mmu-miR-30a ~ Fign    |
| mmu-let-7b ~ Mef2c  | Mef2c ~ Piga   | mmu-let-7b ~ Piga     |
| mmu-let-7c ~ Mef2c  | Mef2c ~ Piga   | mmu-let-7c ~ Piga     |
| mmu-miR-17 ~ Mef2c  | Mef2c ~ Luzp1  | mmu-miR-17 ~ Luzp1    |
| mmu-miR-203 ~ Mef2c | Mef2c ~ Gabrb3 | mmu-miR-203 ~ Gabrb3  |
| mmu-miR-203 ~ Mef2c | Mef2c ~ Glce   | mmu-miR-203 ~ Glce    |
| mmu-miR-203 ~ Mef2c | Mef2c ~ Trp63  | mmu-miR-203 ~ Trp63   |
| mmu-miR-20a ~ Mef2c | Mef2c ~ Luzp1  | mmu-miR-20a ~ Luzp1   |
| mmu-miR-140 ~ Pax9  | Pax9 ~ Hs2st1  | mmu-miR-140 ~ Hs2st1  |
| mmu-miR-140 ~ Pax9  | Pax9 ~ Pdgrfra | mmu-miR-140 ~ Pdgrfra |
| mmu-miR-140 ~ Pax9  | Pax9 ~ Rac1    | mmu-miR-140 ~ Rac1    |
| mmu-miR-140 ~ Pax9  | Pax9 ~ Tgfbr1  | mmu-miR-140 ~ Tgfbr1  |
| mmu-miR-367 ~ Pax9  | Pax9 ~ Cask    | mmu-miR-367 ~ Cask    |
| mmu-miR-367 ~ Pax9  | Pax9 ~ Fst     | mmu-miR-367 ~ Fst     |
| mmu-miR-367 ~ Pax9  | Pax9 ~ Ick     | mmu-miR-367 ~ Ick     |
| mmu-miR-367 ~ Pax9  | Pax9 ~ Luzp1   | mmu-miR-367 ~ Luzp1   |
| mmu-miR-367 ~ Pax9  | Pax9 ~ Mmp16   | mmu-miR-367 ~ Mmp16   |
| mmu-miR-367 ~ Pax9  | Pax9 ~ Pds5b   | mmu-miR-367 ~ Pds5b   |
| mmu-miR-367 ~ Pax9  | Pax9 ~ Pkdcc   | mmu-miR-367 ~ Pkdcc   |
| mmu-miR-367 ~ Pax9  | Pax9 ~ Slc32a1 | mmu-miR-367 ~ Slc32a1 |
| mmu-miR-92a ~ Pax9  | Pax9 ~ Cask    | mmu-miR-92a ~ Cask    |
| mmu-miR-92a ~ Pax9  | Pax9 ~ Fst     | mmu-miR-92a ~ Fst     |
| mmu-miR-92a ~ Pax9  | Pax9 ~ Ick     | mmu-miR-92a ~ Ick     |
| mmu-miR-92a ~ Pax9  | Pax9 ~ Luzp1   | mmu-miR-92a ~ Luzp1   |
| mmu-miR-92a ~ Pax9  | Pax9 ~ Mmp16   | mmu-miR-92a ~ Mmp16   |
| mmu-miR-92a ~ Pax9  | Pax9 ~ Pds5b   | mmu-miR-92a ~ Pds5b   |
| mmu-miR-92a ~ Pax9  | Pax9 ~ Pkdcc   | mmu-miR-92a ~ Pkdcc   |
| mmu-miR-92a ~ Pax9  | Pax9 ~ Slc32a1 | mmu-miR-92a ~ Slc32a1 |
| mmu-let-7b ~ Pbx1   | Pbx1 ~ Chd7    | mmu-let-7b ~ Chd7     |
| mmu-let-7b ~ Pbx1   | Pbx1 ~ Rspo2   | mmu-let-7b ~ Rspo2    |
| mmu-let-7c ~ Pbx1   | Pbx1 ~ Rspo2   | mmu-let-7c ~ Rspo2    |
| mmu-miR-362 ~ Pbx1  | Pbx1 ~ Chd7    | mmu-miR-362 ~ Chd7    |
| mmu-let-7b ~ Pbx2   | Pbx2 ~ Chd7    | mmu-let-7b ~ Chd7     |
| mmu-let-7b ~ Pbx2   | Pbx2 ~ Piga    | mmu-let-7b ~ Piga     |
| mmu-let-7b ~ Pbx2   | Pbx2 ~ Rspo2   | mmu-let-7b ~ Rspo2    |
| mmu-let-7b ~ Pbx2   | Pbx2 ~ Tgfbr1  | mmu-let-7b ~ Tgfbr1   |
| mmu-let-7c ~ Pbx2   | Pbx2 ~ Piga    | mmu-let-7c ~ Piga     |
| mmu-let-7c ~ Pbx2   | Pbx2 ~ Rspo2   | mmu-let-7c ~ Rspo2    |
| mmu-let-7c ~ Pbx2   | Pbx2 ~ Tgfbr1  | mmu-let-7c ~ Tgfbr1   |
| mmu-miR-30a ~ Pbx2  | Pbx2 ~ Acvr1   | mmu-miR-30a ~ Acvr1   |
| mmu-miR-30a ~ Pbx2  | Pbx2 ~ Chd7    | mmu-miR-30a ~ Chd7    |
| mmu-miR-30a ~ Pbx2  | Pbx2 ~ Ednrb   | mmu-miR-30a ~ Ednrb   |
| mmu-miR-30a ~ Pbx2  | Pbx2 ~ Fzd2    | mmu-miR-30a ~ Fzd2    |
| mmu-miR-30a ~ Pbx2  | Pbx2 ~ Fzd7    | mmu-miR-30a ~ Fzd7    |
| mmu-miR-30a ~ Pbx2  | Pbx2 ~ Inhba   | mmu-miR-30a ~ Inhba   |

|                     |                 |                        |
|---------------------|-----------------|------------------------|
| mmu-miR-30a ~ Pbx2  | Pbx2 ~ Pds5b    | mmu-miR-30a ~ Pds5b    |
| mmu-miR-30a ~ Pbx2  | Pbx2 ~ Piga     | mmu-miR-30a ~ Piga     |
| mmu-miR-30a ~ Pbx2  | Pbx2 ~ Prickle1 | mmu-miR-30a ~ Prickle1 |
| mmu-miR-362 ~ Pbx2  | Pbx2 ~ Acvr1    | mmu-miR-362 ~ Acvr1    |
| mmu-miR-362 ~ Pbx2  | Pbx2 ~ Chd7     | mmu-miR-362 ~ Chd7     |
| mmu-miR-362 ~ Pbx2  | Pbx2 ~ Ednrb    | mmu-miR-362 ~ Ednrb    |
| mmu-miR-362 ~ Pbx2  | Pbx2 ~ Gsk3b    | mmu-miR-362 ~ Gsk3b    |
| mmu-let-7b ~ Pbx3   | Pbx3 ~ Chd7     | mmu-let-7b ~ Chd7      |
| mmu-let-7b ~ Pbx3   | Pbx3 ~ Piga     | mmu-let-7b ~ Piga      |
| mmu-let-7b ~ Pbx3   | Pbx3 ~ Rspo2    | mmu-let-7b ~ Rspo2     |
| mmu-let-7b ~ Pbx3   | Pbx3 ~ Tgfbr1   | mmu-let-7b ~ Tgfbr1    |
| mmu-let-7c ~ Pbx3   | Pbx3 ~ Piga     | mmu-let-7c ~ Piga      |
| mmu-let-7c ~ Pbx3   | Pbx3 ~ Rspo2    | mmu-let-7c ~ Rspo2     |
| mmu-let-7c ~ Pbx3   | Pbx3 ~ Tgfbr1   | mmu-let-7c ~ Tgfbr1    |
| mmu-miR-17 ~ Pbx3   | Pbx3 ~ Fzd7     | mmu-miR-17 ~ Fzd7      |
| mmu-miR-17 ~ Pbx3   | Pbx3 ~ Luzp1    | mmu-miR-17 ~ Luzp1     |
| mmu-miR-17 ~ Pbx3   | Pbx3 ~ Pdgfra   | mmu-miR-17 ~ Pdgfra    |
| mmu-miR-17 ~ Pbx3   | Pbx3 ~ Smoc1    | mmu-miR-17 ~ Smoc1     |
| mmu-miR-17 ~ Pbx3   | Pbx3 ~ Tgfbr2   | mmu-miR-17 ~ Tgfbr2    |
| mmu-miR-200b ~ Pbx3 | Pbx3 ~ Bmi1     | mmu-miR-200b ~ Bmi1    |
| mmu-miR-200b ~ Pbx3 | Pbx3 ~ Pdgfra   | mmu-miR-200b ~ Pdgfra  |
| mmu-miR-200b ~ Pbx3 | Pbx3 ~ Pds5b    | mmu-miR-200b ~ Pds5b   |
| mmu-miR-200b ~ Pbx3 | Pbx3 ~ Piga     | mmu-miR-200b ~ Piga    |
| mmu-miR-200b ~ Pbx3 | Pbx3 ~ Schip1   | mmu-miR-200b ~ Schip1  |
| mmu-miR-203 ~ Pbx3  | Pbx3 ~ Ap2b1    | mmu-miR-203 ~ Ap2b1    |
| mmu-miR-203 ~ Pbx3  | Pbx3 ~ Bmi1     | mmu-miR-203 ~ Bmi1     |
| mmu-miR-203 ~ Pbx3  | Pbx3 ~ Dlg1     | mmu-miR-203 ~ Dlg1     |
| mmu-miR-203 ~ Pbx3  | Pbx3 ~ Insig1   | mmu-miR-203 ~ Insig1   |
| mmu-miR-203 ~ Pbx3  | Pbx3 ~ Pdgfra   | mmu-miR-203 ~ Pdgfra   |
| mmu-miR-203 ~ Pbx3  | Pbx3 ~ Trp63    | mmu-miR-203 ~ Trp63    |
| mmu-miR-20a ~ Pbx3  | Pbx3 ~ Luzp1    | mmu-miR-20a ~ Luzp1    |
| mmu-miR-20a ~ Pbx3  | Pbx3 ~ Pdgfra   | mmu-miR-20a ~ Pdgfra   |
| mmu-miR-20a ~ Pbx3  | Pbx3 ~ Smoc1    | mmu-miR-20a ~ Smoc1    |
| mmu-miR-20a ~ Pbx3  | Pbx3 ~ Tgfbr2   | mmu-miR-20a ~ Tgfbr2   |
| mmu-miR-302a ~ Pbx3 | Pbx3 ~ Ednrb    | mmu-miR-302a ~ Ednrb   |
| mmu-miR-302a ~ Pbx3 | Pbx3 ~ Gsk3b    | mmu-miR-302a ~ Gsk3b   |
| mmu-miR-302a ~ Pbx3 | Pbx3 ~ Tgfbr1   | mmu-miR-302a ~ Tgfbr1  |
| mmu-miR-302a ~ Pbx3 | Pbx3 ~ Tgfbr2   | mmu-miR-302a ~ Tgfbr2  |
| mmu-miR-30a ~ Runx1 | Runx1 ~ Eya1    | mmu-miR-30a ~ Eya1     |
| mmu-miR-30a ~ Runx1 | Runx1 ~ Inhba   | mmu-miR-30a ~ Inhba    |
| mmu-miR-30a ~ Six1  | Six1 ~ Nrp1     | mmu-miR-30a ~ Nrp1     |
| mmu-miR-17 ~ Smad4  | Smad4 ~ Hs2st1  | mmu-miR-17 ~ Hs2st1    |
| mmu-miR-17 ~ Smad4  | Smad4 ~ Vegfa   | mmu-miR-17 ~ Vegfa     |
| mmu-miR-20a ~ Smad4 | Smad4 ~ Hs2st1  | mmu-miR-20a ~ Hs2st1   |
| mmu-miR-20a ~ Smad4 | Smad4 ~ Vegfa   | mmu-miR-20a ~ Vegfa    |

|                      |                 |                        |
|----------------------|-----------------|------------------------|
| mmu-miR-200b ~ Snai2 | Snai2 ~ Eya4    | mmu-miR-200b ~ Eya4    |
| mmu-miR-203 ~ Snai2  | Snai2 ~ Eya4    | mmu-miR-203 ~ Eya4     |
| mmu-miR-203 ~ Snai2  | Snai2 ~ Gad2    | mmu-miR-203 ~ Gad2     |
| mmu-miR-203 ~ Snai2  | Snai2 ~ Insig1  | mmu-miR-203 ~ Insig1   |
| mmu-miR-203 ~ Snai2  | Snai2 ~ Shh     | mmu-miR-203 ~ Shh      |
| mmu-miR-206 ~ Snai2  | Snai2 ~ Eya4    | mmu-miR-206 ~ Eya4     |
| mmu-miR-206 ~ Snai2  | Snai2 ~ Tgfbr3  | mmu-miR-206 ~ Tgfbr3   |
| mmu-miR-152 ~ Sox11  | Sox11 ~ Rspo2   | mmu-miR-152 ~ Rspo2    |
| mmu-miR-367 ~ Sox11  | Sox11 ~ Luzp1   | mmu-miR-367 ~ Luzp1    |
| mmu-miR-92a ~ Sox11  | Sox11 ~ Luzp1   | mmu-miR-92a ~ Luzp1    |
| mmu-miR-200b ~ Sox2  | Sox2 ~ Acvr2a   | mmu-miR-200b ~ Acvr2a  |
| mmu-miR-200b ~ Sox2  | Sox2 ~ Bmi1     | mmu-miR-200b ~ Bmi1    |
| mmu-miR-200b ~ Sox2  | Sox2 ~ Schip1   | mmu-miR-200b ~ Schip1  |
| mmu-let-7b ~ Sox6    | Sox6 ~ Chrd     | mmu-let-7b ~ Chrd      |
| mmu-let-7b ~ Sox6    | Sox6 ~ Rspo2    | mmu-let-7b ~ Rspo2     |
| mmu-let-7c ~ Sox6    | Sox6 ~ Chrd     | mmu-let-7c ~ Chrd      |
| mmu-let-7c ~ Sox6    | Sox6 ~ Rspo2    | mmu-let-7c ~ Rspo2     |
| mmu-miR-19a ~ Sox6   | Sox6 ~ Mapk1    | mmu-miR-19a ~ Mapk1    |
| mmu-miR-19b ~ Sox6   | Sox6 ~ Mapk1    | mmu-miR-19b ~ Mapk1    |
| mmu-miR-302a ~ Sox6  | Sox6 ~ Gsk3b    | mmu-miR-302a ~ Gsk3b   |
| mmu-miR-30a ~ Sox9   | Sox9 ~ Acvr1    | mmu-miR-30a ~ Acvr1    |
| mmu-miR-30a ~ Sox9   | Sox9 ~ Fign     | mmu-miR-30a ~ Fign     |
| mmu-miR-30a ~ Sox9   | Sox9 ~ Igf2r    | mmu-miR-30a ~ Igf2r    |
| mmu-miR-30a ~ Sox9   | Sox9 ~ Jag2     | mmu-miR-30a ~ Jag2     |
| mmu-miR-30a ~ Sox9   | Sox9 ~ Nrp1     | mmu-miR-30a ~ Nrp1     |
| mmu-miR-30a ~ Sox9   | Sox9 ~ Pds5b    | mmu-miR-30a ~ Pds5b    |
| mmu-miR-30a ~ Sox9   | Sox9 ~ Prickle1 | mmu-miR-30a ~ Prickle1 |
| mmu-let-7b ~ Sp8     | Sp8 ~ Bmpr1a    | mmu-let-7b ~ Bmpr1a    |
| mmu-let-7b ~ Sp8     | Sp8 ~ Cask      | mmu-let-7b ~ Cask      |
| mmu-let-7b ~ Sp8     | Sp8 ~ Chd7      | mmu-let-7b ~ Chd7      |
| mmu-let-7b ~ Sp8     | Sp8 ~ Chrd      | mmu-let-7b ~ Chrd      |
| mmu-let-7b ~ Sp8     | Sp8 ~ Crk       | mmu-let-7b ~ Crk       |
| mmu-let-7b ~ Sp8     | Sp8 ~ Edn1      | mmu-let-7b ~ Edn1      |
| mmu-let-7b ~ Sp8     | Sp8 ~ Fign      | mmu-let-7b ~ Fign      |
| mmu-let-7b ~ Sp8     | Sp8 ~ Lbr       | mmu-let-7b ~ Lbr       |
| mmu-let-7b ~ Sp8     | Sp8 ~ Piga      | mmu-let-7b ~ Piga      |
| mmu-let-7b ~ Sp8     | Sp8 ~ Tgfbr1    | mmu-let-7b ~ Tgfbr1    |
| mmu-let-7b ~ Sp8     | Sp8 ~ Tgfbr3    | mmu-let-7b ~ Tgfbr3    |
| mmu-let-7b ~ Sp8     | Sp8 ~ Wnt9b     | mmu-let-7b ~ Wnt9b     |
| mmu-let-7c ~ Sp8     | Sp8 ~ Cask      | mmu-let-7c ~ Cask      |
| mmu-let-7c ~ Sp8     | Sp8 ~ Chrd      | mmu-let-7c ~ Chrd      |
| mmu-let-7c ~ Sp8     | Sp8 ~ Edn1      | mmu-let-7c ~ Edn1      |
| mmu-let-7c ~ Sp8     | Sp8 ~ Fign      | mmu-let-7c ~ Fign      |
| mmu-let-7c ~ Sp8     | Sp8 ~ Lbr       | mmu-let-7c ~ Lbr       |
| mmu-let-7c ~ Sp8     | Sp8 ~ Piga      | mmu-let-7c ~ Piga      |

|                     |               |                      |
|---------------------|---------------|----------------------|
| mmu-let-7c ~ Sp8    | Sp8 ~ Tgfbr1  | mmu-let-7c ~ Tgfbr1  |
| mmu-let-7c ~ Sp8    | Sp8 ~ Tgfbr3  | mmu-let-7c ~ Tgfbr3  |
| mmu-let-7c ~ Sp8    | Sp8 ~ Wnt9b   | mmu-let-7c ~ Wnt9b   |
| mmu-miR-17 ~ Sp8    | Sp8 ~ Crk     | mmu-miR-17 ~ Crk     |
| mmu-miR-17 ~ Sp8    | Sp8 ~ Efnb1   | mmu-miR-17 ~ Efnb1   |
| mmu-miR-17 ~ Sp8    | Sp8 ~ Fzd7    | mmu-miR-17 ~ Fzd7    |
| mmu-miR-17 ~ Sp8    | Sp8 ~ Gab1    | mmu-miR-17 ~ Gab1    |
| mmu-miR-17 ~ Sp8    | Sp8 ~ Gad2    | mmu-miR-17 ~ Gad2    |
| mmu-miR-17 ~ Sp8    | Sp8 ~ Hs2st1  | mmu-miR-17 ~ Hs2st1  |
| mmu-miR-17 ~ Sp8    | Sp8 ~ Ift88   | mmu-miR-17 ~ Ift88   |
| mmu-miR-17 ~ Sp8    | Sp8 ~ Itgb8   | mmu-miR-17 ~ Itgb8   |
| mmu-miR-17 ~ Sp8    | Sp8 ~ Luzp1   | mmu-miR-17 ~ Luzp1   |
| mmu-miR-17 ~ Sp8    | Sp8 ~ Pdgfra  | mmu-miR-17 ~ Pdgfra  |
| mmu-miR-17 ~ Sp8    | Sp8 ~ Smoc1   | mmu-miR-17 ~ Smoc1   |
| mmu-miR-17 ~ Sp8    | Sp8 ~ Sos1    | mmu-miR-17 ~ Sos1    |
| mmu-miR-17 ~ Sp8    | Sp8 ~ Tgfbr2  | mmu-miR-17 ~ Tgfbr2  |
| mmu-miR-17 ~ Sp8    | Sp8 ~ Vegfa   | mmu-miR-17 ~ Vegfa   |
| mmu-miR-17 ~ Sp8    | Sp8 ~ Wnt9b   | mmu-miR-17 ~ Wnt9b   |
| mmu-miR-20a ~ Sp8   | Sp8 ~ Crk     | mmu-miR-20a ~ Crk    |
| mmu-miR-20a ~ Sp8   | Sp8 ~ Efnb1   | mmu-miR-20a ~ Efnb1  |
| mmu-miR-20a ~ Sp8   | Sp8 ~ Gab1    | mmu-miR-20a ~ Gab1   |
| mmu-miR-20a ~ Sp8   | Sp8 ~ Gad2    | mmu-miR-20a ~ Gad2   |
| mmu-miR-20a ~ Sp8   | Sp8 ~ Hs2st1  | mmu-miR-20a ~ Hs2st1 |
| mmu-miR-20a ~ Sp8   | Sp8 ~ Itgb8   | mmu-miR-20a ~ Itgb8  |
| mmu-miR-20a ~ Sp8   | Sp8 ~ Luzp1   | mmu-miR-20a ~ Luzp1  |
| mmu-miR-20a ~ Sp8   | Sp8 ~ Pdgfra  | mmu-miR-20a ~ Pdgfra |
| mmu-miR-20a ~ Sp8   | Sp8 ~ Smoc1   | mmu-miR-20a ~ Smoc1  |
| mmu-miR-20a ~ Sp8   | Sp8 ~ Sos1    | mmu-miR-20a ~ Sos1   |
| mmu-miR-20a ~ Sp8   | Sp8 ~ Tgfbr2  | mmu-miR-20a ~ Tgfbr2 |
| mmu-miR-20a ~ Sp8   | Sp8 ~ Vegfa   | mmu-miR-20a ~ Vegfa  |
| mmu-miR-20a ~ Sp8   | Sp8 ~ Wnt9b   | mmu-miR-20a ~ Wnt9b  |
| mmu-miR-206 ~ Tbx3  | Tbx3 ~ Kcnj2  | mmu-miR-206 ~ Kcnj2  |
| mmu-miR-367 ~ Tbx3  | Tbx3 ~ Fst    | mmu-miR-367 ~ Fst    |
| mmu-miR-92a ~ Tbx3  | Tbx3 ~ Fst    | mmu-miR-92a ~ Fst    |
| mmu-miR-367 ~ Tcf21 | Tcf21 ~ Luzp1 | mmu-miR-367 ~ Luzp1  |
| mmu-miR-92a ~ Tcf21 | Tcf21 ~ Luzp1 | mmu-miR-92a ~ Luzp1  |
| mmu-miR-140 ~ Zeb1  | Zeb1 ~ Fgf9   | mmu-miR-140 ~ Fgf9   |
| mmu-miR-140 ~ Zeb1  | Zeb1 ~ Rac1   | mmu-miR-140 ~ Rac1   |
| mmu-miR-200b ~ Zeb1 | Zeb1 ~ Apaf1  | mmu-miR-200b ~ Apaf1 |
| mmu-miR-200b ~ Zeb1 | Zeb1 ~ Bmi1   | mmu-miR-200b ~ Bmi1  |
| mmu-miR-200b ~ Zeb1 | Zeb1 ~ Piga   | mmu-miR-200b ~ Piga  |
| mmu-miR-200b ~ Zeb1 | Zeb1 ~ Rac1   | mmu-miR-200b ~ Rac1  |
| mmu-miR-369 ~ Zeb1  | Zeb1 ~ Cask   | mmu-miR-369 ~ Cask   |
| mmu-miR-369 ~ Zeb1  | Zeb1 ~ Crk    | mmu-miR-369 ~ Crk    |
| mmu-miR-369 ~ Zeb1  | Zeb1 ~ Eya1   | mmu-miR-369 ~ Eya1   |

|                    |               |                      |
|--------------------|---------------|----------------------|
| mmu-miR-369 ~ Zeb1 | Zeb1 ~ Gabrb3 | mmu-miR-369 ~ Gabrb3 |
| mmu-miR-369 ~ Zeb1 | Zeb1 ~ Gsk3b  | mmu-miR-369 ~ Gsk3b  |
| mmu-miR-369 ~ Zeb1 | Zeb1 ~ Inhbb  | mmu-miR-369 ~ Inhbb  |

**Table S8.** Mouse cleft palate related miRNA-TF-gene type III motifs.

| miRNA-TF pair        | TF-Gene pair    | miRNA-Gene pair        | TF-miRNA pair        |
|----------------------|-----------------|------------------------|----------------------|
| mmu-miR-19a ~ Foxf2  | Foxf2 ~ Apaf1   | mmu-miR-19a ~ Apaf1    | Foxf2 ~ mmu-miR-19a  |
| mmu-miR-19a ~ Foxf2  | Foxf2 ~ Ctgf    | mmu-miR-19a ~ Ctgf     | Foxf2 ~ mmu-miR-19a  |
| mmu-miR-19a ~ Foxf2  | Foxf2 ~ Dicer1  | mmu-miR-19a ~ Dicer1   | Foxf2 ~ mmu-miR-19a  |
| mmu-miR-19a ~ Foxf2  | Foxf2 ~ Dlg1    | mmu-miR-19a ~ Dlg1     | Foxf2 ~ mmu-miR-19a  |
| mmu-miR-19a ~ Foxf2  | Foxf2 ~ Ephb3   | mmu-miR-19a ~ Ephb3    | Foxf2 ~ mmu-miR-19a  |
| mmu-miR-19a ~ Foxf2  | Foxf2 ~ Fgf10   | mmu-miR-19a ~ Fgf10    | Foxf2 ~ mmu-miR-19a  |
| mmu-miR-19a ~ Foxf2  | Foxf2 ~ Igf2r   | mmu-miR-19a ~ Igf2r    | Foxf2 ~ mmu-miR-19a  |
| mmu-miR-19a ~ Foxf2  | Foxf2 ~ Kcnj2   | mmu-miR-19a ~ Kcnj2    | Foxf2 ~ mmu-miR-19a  |
| mmu-miR-19a ~ Foxf2  | Foxf2 ~ Kif3a   | mmu-miR-19a ~ Kif3a    | Foxf2 ~ mmu-miR-19a  |
| mmu-miR-19a ~ Foxf2  | Foxf2 ~ Lrp6    | mmu-miR-19a ~ Lrp6     | Foxf2 ~ mmu-miR-19a  |
| mmu-miR-19a ~ Foxf2  | Foxf2 ~ Mapk1   | mmu-miR-19a ~ Mapk1    | Foxf2 ~ mmu-miR-19a  |
| mmu-miR-19a ~ Foxf2  | Foxf2 ~ Tgfbr2  | mmu-miR-19a ~ Tgfbr2   | Foxf2 ~ mmu-miR-19a  |
| mmu-miR-200b ~ Foxf2 | Foxf2 ~ Acvr2a  | mmu-miR-200b ~ Acvr2a  | Foxf2 ~ mmu-miR-200b |
| mmu-miR-200b ~ Foxf2 | Foxf2 ~ Apaf1   | mmu-miR-200b ~ Apaf1   | Foxf2 ~ mmu-miR-200b |
| mmu-miR-200b ~ Foxf2 | Foxf2 ~ Bmi1    | mmu-miR-200b ~ Bmi1    | Foxf2 ~ mmu-miR-200b |
| mmu-miR-200b ~ Foxf2 | Foxf2 ~ Eya4    | mmu-miR-200b ~ Eya4    | Foxf2 ~ mmu-miR-200b |
| mmu-miR-200b ~ Foxf2 | Foxf2 ~ Fgf10   | mmu-miR-200b ~ Fgf10   | Foxf2 ~ mmu-miR-200b |
| mmu-miR-200b ~ Foxf2 | Foxf2 ~ Impad1  | mmu-miR-200b ~ Impad1  | Foxf2 ~ mmu-miR-200b |
| mmu-miR-200b ~ Foxf2 | Foxf2 ~ Mdm4    | mmu-miR-200b ~ Mdm4    | Foxf2 ~ mmu-miR-200b |
| mmu-miR-200b ~ Foxf2 | Foxf2 ~ Pdgfra  | mmu-miR-200b ~ Pdgfra  | Foxf2 ~ mmu-miR-200b |
| mmu-miR-200b ~ Foxf2 | Foxf2 ~ Pds5b   | mmu-miR-200b ~ Pds5b   | Foxf2 ~ mmu-miR-200b |
| mmu-miR-200b ~ Foxf2 | Foxf2 ~ Piga    | mmu-miR-200b ~ Piga    | Foxf2 ~ mmu-miR-200b |
| mmu-miR-200b ~ Foxf2 | Foxf2 ~ Rac1    | mmu-miR-200b ~ Rac1    | Foxf2 ~ mmu-miR-200b |
| mmu-miR-200b ~ Foxf2 | Foxf2 ~ Schip1  | mmu-miR-200b ~ Schip1  | Foxf2 ~ mmu-miR-200b |
| mmu-miR-200b ~ Foxf2 | Foxf2 ~ Vegfa   | mmu-miR-200b ~ Vegfa   | Foxf2 ~ mmu-miR-200b |
| mmu-miR-302a ~ Foxf2 | Foxf2 ~ Adamts9 | mmu-miR-302a ~ Adamts9 | Foxf2 ~ mmu-miR-302a |
| mmu-miR-302a ~ Foxf2 | Foxf2 ~ Ednrb   | mmu-miR-302a ~ Ednrb   | Foxf2 ~ mmu-miR-302a |
| mmu-miR-302a ~ Foxf2 | Foxf2 ~ Fgf10   | mmu-miR-302a ~ Fgf10   | Foxf2 ~ mmu-miR-302a |
| mmu-miR-302a ~ Foxf2 | Foxf2 ~ Gad2    | mmu-miR-302a ~ Gad2    | Foxf2 ~ mmu-miR-302a |
| mmu-miR-302a ~ Foxf2 | Foxf2 ~ Gsk3b   | mmu-miR-302a ~ Gsk3b   | Foxf2 ~ mmu-miR-302a |
| mmu-miR-302a ~ Foxf2 | Foxf2 ~ Rad23b  | mmu-miR-302a ~ Rad23b  | Foxf2 ~ mmu-miR-302a |
| mmu-miR-302a ~ Foxf2 | Foxf2 ~ Tgfbr1  | mmu-miR-302a ~ Tgfbr1  | Foxf2 ~ mmu-miR-302a |
| mmu-miR-302a ~ Foxf2 | Foxf2 ~ Tgfbr2  | mmu-miR-302a ~ Tgfbr2  | Foxf2 ~ mmu-miR-302a |
| mmu-miR-302a ~ Foxf2 | Foxf2 ~ Tiparp  | mmu-miR-302a ~ Tiparp  | Foxf2 ~ mmu-miR-302a |
| mmu-miR-302a ~ Foxf2 | Foxf2 ~ Vegfa   | mmu-miR-302a ~ Vegfa   | Foxf2 ~ mmu-miR-302a |
| mmu-miR-362 ~ Foxf2  | Foxf2 ~ Acvr1   | mmu-miR-362 ~ Acvr1    | Foxf2 ~ mmu-miR-362  |
| mmu-miR-362 ~ Foxf2  | Foxf2 ~ Adamts9 | mmu-miR-362 ~ Adamts9  | Foxf2 ~ mmu-miR-362  |
| mmu-miR-362 ~ Foxf2  | Foxf2 ~ Akap8   | mmu-miR-362 ~ Akap8    | Foxf2 ~ mmu-miR-362  |
| mmu-miR-362 ~ Foxf2  | Foxf2 ~ Cask    | mmu-miR-362 ~ Cask     | Foxf2 ~ mmu-miR-362  |
| mmu-miR-362 ~ Foxf2  | Foxf2 ~ Chd7    | mmu-miR-362 ~ Chd7     | Foxf2 ~ mmu-miR-362  |
| mmu-miR-362 ~ Foxf2  | Foxf2 ~ Ednrb   | mmu-miR-362 ~ Ednrb    | Foxf2 ~ mmu-miR-362  |
| mmu-miR-362 ~ Foxf2  | Foxf2 ~ Eya1    | mmu-miR-362 ~ Eya1     | Foxf2 ~ mmu-miR-362  |
| mmu-miR-362 ~ Foxf2  | Foxf2 ~ Gad2    | mmu-miR-362 ~ Gad2     | Foxf2 ~ mmu-miR-362  |

|                      |                 |                       |                      |
|----------------------|-----------------|-----------------------|----------------------|
| mmu-miR-362 ~ Foxf2  | Foxf2 ~ Grb2    | mmu-miR-362 ~ Grb2    | Foxf2 ~ mmu-miR-362  |
| mmu-miR-362 ~ Foxf2  | Foxf2 ~ Gsk3b   | mmu-miR-362 ~ Gsk3b   | Foxf2 ~ mmu-miR-362  |
| mmu-miR-362 ~ Foxf2  | Foxf2 ~ Insig2  | mmu-miR-362 ~ Insig2  | Foxf2 ~ mmu-miR-362  |
| mmu-miR-30a ~ Gli2   | Gli2 ~ Apaf1    | mmu-miR-30a ~ Apaf1   | Gli2 ~ mmu-miR-30a   |
| mmu-miR-30a ~ Gli2   | Gli2 ~ Fst      | mmu-miR-30a ~ Fst     | Gli2 ~ mmu-miR-30a   |
| mmu-miR-30a ~ Gli2   | Gli2 ~ Rad23b   | mmu-miR-30a ~ Rad23b  | Gli2 ~ mmu-miR-30a   |
| mmu-miR-30a ~ Gli2   | Gli2 ~ Sos1     | mmu-miR-30a ~ Sos1    | Gli2 ~ mmu-miR-30a   |
| mmu-miR-367 ~ Hand1  | Hand1 ~ Itga5   | mmu-miR-367 ~ Itga5   | Hand1 ~ mmu-miR-367  |
| mmu-miR-367 ~ Hand1  | Hand1 ~ Plekha1 | mmu-miR-367 ~ Plekha1 | Hand1 ~ mmu-miR-367  |
| mmu-miR-367 ~ Hand2  | Hand2 ~ Itga5   | mmu-miR-367 ~ Itga5   | Hand2 ~ mmu-miR-367  |
| mmu-miR-367 ~ Hand2  | Hand2 ~ Plekha1 | mmu-miR-367 ~ Plekha1 | Hand2 ~ mmu-miR-367  |
| mmu-let-7b ~ Mef2c   | Mef2c ~ Piga    | mmu-let-7b ~ Piga     | Mef2c ~ mmu-let-7b   |
| mmu-miR-140 ~ Pax9   | Pax9 ~ Hs2st1   | mmu-miR-140 ~ Hs2st1  | Pax9 ~ mmu-miR-140   |
| mmu-miR-140 ~ Pax9   | Pax9 ~ Pdgfra   | mmu-miR-140 ~ Pdgfra  | Pax9 ~ mmu-miR-140   |
| mmu-miR-140 ~ Pax9   | Pax9 ~ Rac1     | mmu-miR-140 ~ Rac1    | Pax9 ~ mmu-miR-140   |
| mmu-miR-140 ~ Pax9   | Pax9 ~ Tgfbr1   | mmu-miR-140 ~ Tgfbr1  | Pax9 ~ mmu-miR-140   |
| mmu-miR-30a ~ Runx1  | Runx1 ~ Eya1    | mmu-miR-30a ~ Eya1    | Runx1 ~ mmu-miR-30a  |
| mmu-miR-30a ~ Runx1  | Runx1 ~ Inhba   | mmu-miR-30a ~ Inhba   | Runx1 ~ mmu-miR-30a  |
| mmu-miR-200b ~ Snai2 | Snai2 ~ Eya4    | mmu-miR-200b ~ Eya4   | Snai2 ~ mmu-miR-200b |
| mmu-let-7b ~ Sp8     | Sp8 ~ Bmpr1a    | mmu-let-7b ~ Bmpr1a   | Sp8 ~ mmu-let-7b     |
| mmu-let-7b ~ Sp8     | Sp8 ~ Cask      | mmu-let-7b ~ Cask     | Sp8 ~ mmu-let-7b     |
| mmu-let-7b ~ Sp8     | Sp8 ~ Chd7      | mmu-let-7b ~ Chd7     | Sp8 ~ mmu-let-7b     |
| mmu-let-7b ~ Sp8     | Sp8 ~ Chrd      | mmu-let-7b ~ Chrd     | Sp8 ~ mmu-let-7b     |
| mmu-let-7b ~ Sp8     | Sp8 ~ Crk       | mmu-let-7b ~ Crk      | Sp8 ~ mmu-let-7b     |
| mmu-let-7b ~ Sp8     | Sp8 ~ Edn1      | mmu-let-7b ~ Edn1     | Sp8 ~ mmu-let-7b     |
| mmu-let-7b ~ Sp8     | Sp8 ~ Fign      | mmu-let-7b ~ Fign     | Sp8 ~ mmu-let-7b     |
| mmu-let-7b ~ Sp8     | Sp8 ~ Lbr       | mmu-let-7b ~ Lbr      | Sp8 ~ mmu-let-7b     |
| mmu-let-7b ~ Sp8     | Sp8 ~ Piga      | mmu-let-7b ~ Piga     | Sp8 ~ mmu-let-7b     |
| mmu-let-7b ~ Sp8     | Sp8 ~ Tgfbr1    | mmu-let-7b ~ Tgfbr1   | Sp8 ~ mmu-let-7b     |
| mmu-let-7b ~ Sp8     | Sp8 ~ Tgfbr3    | mmu-let-7b ~ Tgfbr3   | Sp8 ~ mmu-let-7b     |
| mmu-let-7b ~ Sp8     | Sp8 ~ Wnt9b     | mmu-let-7b ~ Wnt9b    | Sp8 ~ mmu-let-7b     |
| mmu-miR-17 ~ Sp8     | Sp8 ~ Crk       | mmu-miR-17 ~ Crk      | Sp8 ~ mmu-miR-17     |
| mmu-miR-17 ~ Sp8     | Sp8 ~ Efnb1     | mmu-miR-17 ~ Efnb1    | Sp8 ~ mmu-miR-17     |
| mmu-miR-17 ~ Sp8     | Sp8 ~ Fzd7      | mmu-miR-17 ~ Fzd7     | Sp8 ~ mmu-miR-17     |
| mmu-miR-17 ~ Sp8     | Sp8 ~ Gab1      | mmu-miR-17 ~ Gab1     | Sp8 ~ mmu-miR-17     |
| mmu-miR-17 ~ Sp8     | Sp8 ~ Gad2      | mmu-miR-17 ~ Gad2     | Sp8 ~ mmu-miR-17     |
| mmu-miR-17 ~ Sp8     | Sp8 ~ Hs2st1    | mmu-miR-17 ~ Hs2st1   | Sp8 ~ mmu-miR-17     |
| mmu-miR-17 ~ Sp8     | Sp8 ~ Ift88     | mmu-miR-17 ~ Ift88    | Sp8 ~ mmu-miR-17     |
| mmu-miR-17 ~ Sp8     | Sp8 ~ Itgb8     | mmu-miR-17 ~ Itgb8    | Sp8 ~ mmu-miR-17     |
| mmu-miR-17 ~ Sp8     | Sp8 ~ Luzp1     | mmu-miR-17 ~ Luzp1    | Sp8 ~ mmu-miR-17     |
| mmu-miR-17 ~ Sp8     | Sp8 ~ Pdgfra    | mmu-miR-17 ~ Pdgfra   | Sp8 ~ mmu-miR-17     |
| mmu-miR-17 ~ Sp8     | Sp8 ~ Smoc1     | mmu-miR-17 ~ Smoc1    | Sp8 ~ mmu-miR-17     |
| mmu-miR-17 ~ Sp8     | Sp8 ~ Sos1      | mmu-miR-17 ~ Sos1     | Sp8 ~ mmu-miR-17     |
| mmu-miR-17 ~ Sp8     | Sp8 ~ Tgfbr2    | mmu-miR-17 ~ Tgfbr2   | Sp8 ~ mmu-miR-17     |
| mmu-miR-17 ~ Sp8     | Sp8 ~ Vegfa     | mmu-miR-17 ~ Vegfa    | Sp8 ~ mmu-miR-17     |



|                     |              |                      |                     |
|---------------------|--------------|----------------------|---------------------|
| mmu-miR-17 ~ Sp8    | Sp8 ~ Wnt9b  | mmu-miR-17 ~ Wnt9b   | Sp8 ~ mmu-miR-17    |
| mmu-miR-20a ~ Sp8   | Sp8 ~ Crk    | mmu-miR-20a ~ Crk    | Sp8 ~ mmu-miR-20a   |
| mmu-miR-20a ~ Sp8   | Sp8 ~ Efnb1  | mmu-miR-20a ~ Efnb1  | Sp8 ~ mmu-miR-20a   |
| mmu-miR-20a ~ Sp8   | Sp8 ~ Gab1   | mmu-miR-20a ~ Gab1   | Sp8 ~ mmu-miR-20a   |
| mmu-miR-20a ~ Sp8   | Sp8 ~ Gad2   | mmu-miR-20a ~ Gad2   | Sp8 ~ mmu-miR-20a   |
| mmu-miR-20a ~ Sp8   | Sp8 ~ Hs2st1 | mmu-miR-20a ~ Hs2st1 | Sp8 ~ mmu-miR-20a   |
| mmu-miR-20a ~ Sp8   | Sp8 ~ Itgb8  | mmu-miR-20a ~ Itgb8  | Sp8 ~ mmu-miR-20a   |
| mmu-miR-20a ~ Sp8   | Sp8 ~ Luzp1  | mmu-miR-20a ~ Luzp1  | Sp8 ~ mmu-miR-20a   |
| mmu-miR-20a ~ Sp8   | Sp8 ~ Pdgfra | mmu-miR-20a ~ Pdgfra | Sp8 ~ mmu-miR-20a   |
| mmu-miR-20a ~ Sp8   | Sp8 ~ Smoc1  | mmu-miR-20a ~ Smoc1  | Sp8 ~ mmu-miR-20a   |
| mmu-miR-20a ~ Sp8   | Sp8 ~ Sos1   | mmu-miR-20a ~ Sos1   | Sp8 ~ mmu-miR-20a   |
| mmu-miR-20a ~ Sp8   | Sp8 ~ Tgfbr2 | mmu-miR-20a ~ Tgfbr2 | Sp8 ~ mmu-miR-20a   |
| mmu-miR-20a ~ Sp8   | Sp8 ~ Vegfa  | mmu-miR-20a ~ Vegfa  | Sp8 ~ mmu-miR-20a   |
| mmu-miR-20a ~ Sp8   | Sp8 ~ Wnt9b  | mmu-miR-20a ~ Wnt9b  | Sp8 ~ mmu-miR-20a   |
| mmu-miR-140 ~ Zeb1  | Zeb1 ~ Fgf9  | mmu-miR-140 ~ Fgf9   | Zeb1 ~ mmu-miR-140  |
| mmu-miR-140 ~ Zeb1  | Zeb1 ~ Rac1  | mmu-miR-140 ~ Rac1   | Zeb1 ~ mmu-miR-140  |
| mmu-miR-200b ~ Zeb1 | Zeb1 ~ Apaf1 | mmu-miR-200b ~ Apaf1 | Zeb1 ~ mmu-miR-200b |
| mmu-miR-200b ~ Zeb1 | Zeb1 ~ Bmi1  | mmu-miR-200b ~ Bmi1  | Zeb1 ~ mmu-miR-200b |
| mmu-miR-200b ~ Zeb1 | Zeb1 ~ Piga  | mmu-miR-200b ~ Piga  | Zeb1 ~ mmu-miR-200b |
| mmu-miR-200b ~ Zeb1 | Zeb1 ~ Rac1  | mmu-miR-200b ~ Rac1  | Zeb1 ~ mmu-miR-200b |

**Table S9.** Pathway enrichment analysis of consensus TFs and genes in humans.

| Pathway ID | KEGG pathway name                                                               | Count | Obs. # | P-value  | FDR      |
|------------|---------------------------------------------------------------------------------|-------|--------|----------|----------|
| hsa05200   | Pathways in cancer - Homo sapiens (human)                                       | 397   | 13     | 1.50E-10 | 4.54E-08 |
| hsa04010   | MAPK signaling pathway - Homo sapiens (human)                                   | 255   | 9      | 1.23E-07 | 1.37E-05 |
| hsa05218   | Melanoma - Homo sapiens (human)                                                 | 71    | 6      | 1.36E-07 | 1.37E-05 |
| hsa04350   | TGF-beta signaling pathway - Homo sapiens (human)                               | 84    | 6      | 3.74E-07 | 2.84E-05 |
| hsa05224   | Breast cancer - Homo sapiens (human)                                            | 146   | 7      | 5.32E-07 | 3.23E-05 |
| hsa04015   | Rap1 signaling pathway - Homo sapiens (human)                                   | 212   | 7      | 6.52E-06 | 3.19E-04 |
| hsa04810   | Regulation of actin cytoskeleton - Homo sapiens (human)                         | 216   | 7      | 7.38E-06 | 3.19E-04 |
| hsa04014   | Ras signaling pathway - Homo sapiens (human)                                    | 229   | 7      | 1.08E-05 | 4.11E-04 |
| hsa04390   | Hippo signaling pathway - Homo sapiens (human)                                  | 154   | 6      | 1.31E-05 | 4.41E-04 |
| hsa04151   | PI3K-Akt signaling pathway - Homo sapiens (human)                               | 341   | 8      | 1.56E-05 | 4.72E-04 |
| hsa05217   | Basal cell carcinoma - Homo sapiens (human)                                     | 55    | 4      | 3.86E-05 | 1.06E-03 |
| hsa04550   | Signaling pathways regulating pluripotency of stem cells - Homo sapiens (human) | 142   | 5      | 1.24E-04 | 3.14E-03 |
| hsa05230   | Central carbon metabolism in cancer - Homo sapiens (human)                      | 67    | 3      | 1.67E-03 | 3.90E-02 |
| hsa05166   | HTLV-I infection - Homo sapiens (human)                                         | 258   | 5      | 1.92E-03 | 4.16E-02 |
| hsa04060   | Cytokine-cytokine receptor interaction - Homo sapiens (human)                   | 265   | 5      | 2.16E-03 | 4.37E-02 |

FDR: false discovery rate.

**Table S10.** Pathway enrichment analysis of consensus TFs and genes in mice.

| Pathway ID | KEGG pathway name                                       | Count | Obs. # | P-value  | FDR      |
|------------|---------------------------------------------------------|-------|--------|----------|----------|
| mmu05200   | Pathways in cancer - Mus musculus (mouse)               | 395   | 13     | 3.63E-11 | 1.09E-08 |
| mmu04010   | MAPK signaling pathway - Mus musculus (mouse)           | 252   | 9      | 4.39E-08 | 6.57E-06 |
| mmu05218   | Melanoma - Mus musculus (mouse)                         | 71    | 6      | 7.17E-08 | 7.15E-06 |
| mmu04350   | TGF-beta signaling pathway - Mus musculus (mouse)       | 85    | 6      | 2.13E-07 | 1.53E-05 |
| mmu05224   | Breast cancer - Mus musculus (mouse)                    | 146   | 7      | 2.56E-07 | 1.53E-05 |
| mmu04015   | Rap1 signaling pathway - Mus musculus (mouse)           | 215   | 7      | 3.50E-06 | 1.64E-04 |
| mmu04810   | Regulation of actin cytoskeleton - Mus musculus (mouse) | 218   | 7      | 3.84E-06 | 1.64E-04 |
| mmu04014   | Ras signaling pathway - Mus musculus (mouse)            | 230   | 7      | 5.47E-06 | 2.05E-04 |
| mmu04390   | Hippo signaling pathway - Mus musculus (mouse)          | 154   | 6      | 7.05E-06 | 2.29E-04 |
| mmu04151   | PI3K-Akt signaling pathway - Mus musculus (mouse)       | 345   | 8      | 7.65E-06 | 2.29E-04 |

FDR: false discovery rate.

**Table S11.** Consensus interactions for each pair within the tri-molecules between humans and mice.

| TF-gene |               | TF-miRNA |          | miRNA-gene |               | miRNA-TF |       |
|---------|---------------|----------|----------|------------|---------------|----------|-------|
| FOXE1   | <i>BMP2</i>   | FOXE1    | miR-17   | miR-140    | <i>FGF9</i>   | miR-140  | BMP2  |
| FOXE1   | <i>BMP4</i>   | FOXE1    | miR-18a  | miR-140    | <i>PDGFRA</i> | miR-140  | PAX9  |
| FOXE1   | <i>BMP7</i>   | FOXE1    | miR-19a  | miR-17     | <i>PDGFRA</i> | miR-17   | BMP2  |
| FOXE1   | <i>FGF8</i>   | FOXE1    | miR-20a  | miR-20a    | <i>PDGFRA</i> | miR-17   | SP8   |
| FOXE1   | <i>FGFR1</i>  | FOXE1    | miR-451a |            |               | miR-19a  | FOXF2 |
| FOXE1   | <i>FGFR2</i>  | SOX9     | miR-18a  |            |               | miR-19b  | FOXF2 |
| FOXE1   | <i>GABRB3</i> | SOX9     | miR-19a  |            |               | miR-20a  | BMP2  |
| FOXE1   | <i>MSX1</i>   | SOX9     | miR-20a  |            |               | miR-20a  | SP8   |
| FOXE1   | <i>PAX9</i>   | SP8      | miR-140  |            |               | miR-92a  | PAX9  |
| FOXE1   | <i>PDGFRA</i> | SP8      | miR-451a |            |               |          |       |
| FOXE1   | <i>PTCH1</i>  |          |          |            |               |          |       |
| FOXE1   | <i>ROR2</i>   |          |          |            |               |          |       |
| FOXE1   | <i>RYK</i>    |          |          |            |               |          |       |
| FOXE1   | <i>SOX9</i>   |          |          |            |               |          |       |
| FOXE1   | <i>TBX1</i>   |          |          |            |               |          |       |
| FOXE1   | <i>TBX22</i>  |          |          |            |               |          |       |
| FOXE1   | <i>TCOF1</i>  |          |          |            |               |          |       |
| FOXE1   | <i>TFAP2A</i> |          |          |            |               |          |       |
| FOXE1   | <i>TGFB1</i>  |          |          |            |               |          |       |
| FOXE1   | <i>TGFB3</i>  |          |          |            |               |          |       |
| FOXE1   | <i>TP63</i>   |          |          |            |               |          |       |
| FOXE1   | <i>VAX1</i>   |          |          |            |               |          |       |
| FOXE1   | <i>WNT5A</i>  |          |          |            |               |          |       |
| FOXF2   | <i>GABRB3</i> |          |          |            |               |          |       |
| FOXF2   | <i>TBX22</i>  |          |          |            |               |          |       |
| FOXF2   | <i>TGFB3</i>  |          |          |            |               |          |       |
| SOX9    | <i>SP8</i>    |          |          |            |               |          |       |
| SOX9    | <i>TBX1</i>   |          |          |            |               |          |       |
| SP8     | <i>BMP4</i>   |          |          |            |               |          |       |
| SP8     | <i>FGF18</i>  |          |          |            |               |          |       |
| SP8     | <i>FGF8</i>   |          |          |            |               |          |       |
| SP8     | <i>FOXF2</i>  |          |          |            |               |          |       |
| SP8     | <i>GABRB3</i> |          |          |            |               |          |       |
| SP8     | <i>GRHL3</i>  |          |          |            |               |          |       |
| SP8     | <i>IRF6</i>   |          |          |            |               |          |       |
| SP8     | <i>JAG2</i>   |          |          |            |               |          |       |
| SP8     | <i>MNI</i>    |          |          |            |               |          |       |
| SP8     | <i>NOG</i>    |          |          |            |               |          |       |
| SP8     | <i>PAX3</i>   |          |          |            |               |          |       |
| SP8     | <i>PAX9</i>   |          |          |            |               |          |       |
| SP8     | <i>PTCH1</i>  |          |          |            |               |          |       |
| SP8     | <i>ROR2</i>   |          |          |            |               |          |       |
| SP8     | <i>SOX9</i>   |          |          |            |               |          |       |
| SP8     | <i>TBX1</i>   |          |          |            |               |          |       |
| SP8     | <i>TCOF1</i>  |          |          |            |               |          |       |
| SP8     | <i>TFAP2A</i> |          |          |            |               |          |       |
| SP8     | <i>VAX1</i>   |          |          |            |               |          |       |
| SP8     | <i>WNT5A</i>  |          |          |            |               |          |       |
| TBX1    | <i>GABRB3</i> |          |          |            |               |          |       |

**Table S12.** List of targets of each hub TF or miRNA in humans.

| FOXE1    | PTCH1   | RARA    | SOX9  | SP8      | TFAP2A   | miR-20a | miR-27b | miR-424  | miR-497  |
|----------|---------|---------|-------|----------|----------|---------|---------|----------|----------|
| AHCYL2   | DHFR    | AXIN2   | FGF1  | AHCYL2   | ARHGAP29 | BHMT2   | COL11A2 | AHCYL2   | AHCYL2   |
| AXIN2    | FGF18   | FGF1    | MID1  | ARHGAP29 | COL11A2  | FGF4    | CYP1B1  | ARNT     | ARNT     |
| BHMT2    | GABRB3  | FGFR3   | MN1   | AXIN2    | CYP1B1   | FGF7    | FGF1    | AXIN2    | AXIN2    |
| CRISPLD1 | PDGFRA  | GABRB3  | SDC2  | CRISPLD1 | FGF1     | MID1    | GABRB3  | CRISPLD2 | CRISPLD2 |
| CYP1B1   | PTCH1   | GDF6    | TBK1  | CRISPLD2 | FGF18    | PDGFRA  | GCH1    | FGF1     | FGF1     |
| DHFR     | SMC2    | MID1    | TIMP2 | FAM49A   | FGFR3    | SDC2    | GDF6    | FGF2     | FGF2     |
| ERBB2    | TGFA    | PDGFRA  | TNS1  | FGF1     | GABRB3   | SP8     | GREM1   | FGF7     | FGF7     |
| FGF1     | TPM1    | PTCH1   | TPM1  | FGF18    | GCH1     | TIMP2   | PDGFRA  | FGF9     | FGF9     |
| FGF7     | WDR1    | STAB2   |       | FGF2     | GDF6     | TNS1    | RARA    | FGFR1    | FGFR1    |
| FGFR1    | WNT5A   | SUMO1   |       | FGF4     | GREM1    | ZNF236  | SDC2    | FGFR2    | FGFR2    |
| FGFR2    | ZNF385B | WNT11   |       | FGFR3    | MID1     |         | STAB2   | MN1      | MN1      |
| GABRB3   |         | ZNF385B |       | MN1      | MYH9     |         | SUMO1   | PTCH1    | PTCH1    |
| GCH1     |         |         |       | PTCH1    | PTCH1    |         |         | RHPN2    | RHPN2    |
| MID1     |         |         |       | RHPN2    | RHPN2    |         |         |          |          |
| MTHFD1   |         |         |       | TGFA     | SMC2     |         |         |          |          |
| NOS3     |         |         |       | TIMP2    | STAB2    |         |         |          |          |
| PDGFRA   |         |         |       | ZNF236   | WNT11    |         |         |          |          |
| PTCH1    |         |         |       | ZNF385B  | WNT3A    |         |         |          |          |
| RHPN2    |         |         |       |          | ZNF236   |         |         |          |          |
| SDC2     |         |         |       |          | ZNF385B  |         |         |          |          |
| STAB2    |         |         |       |          |          |         |         |          |          |
| SUMO1    |         |         |       |          |          |         |         |          |          |
| TNS1     |         |         |       |          |          |         |         |          |          |
| TP63     |         |         |       |          |          |         |         |          |          |
| TPM1     |         |         |       |          |          |         |         |          |          |
| UBB      |         |         |       |          |          |         |         |          |          |
| WNT10A   |         |         |       |          |          |         |         |          |          |
| WNT5A    |         |         |       |          |          |         |         |          |          |
| ZNF236   |         |         |       |          |          |         |         |          |          |
| ZNF385B  |         |         |       |          |          |         |         |          |          |

**Table S13.** List of targets of each hub TF or miRNA in mice.

| Foxd3           |                 | Foxe1           |                 | Foxf2           |                 | Sp8             |               |                |
|-----------------|-----------------|-----------------|-----------------|-----------------|-----------------|-----------------|---------------|----------------|
| <i>Acvr1</i>    | <i>Hspg2</i>    | <i>Acvr1</i>    | <i>Hspg2</i>    | <i>Acvr1</i>    | <i>Hspg2</i>    | <i>Acvr1</i>    | <i>Fgfr1</i>  | <i>Mmp14</i>   |
| <i>Acvr2a</i>   | <i>Ick</i>      | <i>Acvr2a</i>   | <i>Ick</i>      | <i>Acvr2a</i>   | <i>Ick</i>      | <i>Acvr2a</i>   | <i>Fgfr2</i>  | <i>Mmp16</i>   |
| <i>Adamts20</i> | <i>Ifi88</i>    | <i>Adamts20</i> | <i>Ifi88</i>    | <i>Adamts20</i> | <i>Ifi88</i>    | <i>Adamts20</i> | <i>Fign</i>   | <i>Nog</i>     |
| <i>Adamts9</i>  | <i>Igf2r</i>    | <i>Adamts9</i>  | <i>Igf2r</i>    | <i>Adamts9</i>  | <i>Igf2r</i>    | <i>Adamts9</i>  | <i>Fst</i>    | <i>Nrp1</i>    |
| <i>Akap8</i>    | <i>Impad1</i>   | <i>Akap8</i>    | <i>Impad1</i>   | <i>Akap8</i>    | <i>Impad1</i>   | <i>Akap8</i>    | <i>Fuz</i>    | <i>Pdgfc</i>   |
| <i>Ap2b1</i>    | <i>Inhba</i>    | <i>Ap2b1</i>    | <i>Inhba</i>    | <i>Ap2b1</i>    | <i>Inhba</i>    | <i>Ap2b1</i>    | <i>Fzd7</i>   | <i>Pdgfra</i>  |
| <i>Apaf1</i>    | <i>Insig2</i>   | <i>Apaf1</i>    | <i>Insig2</i>   | <i>Apaf1</i>    | <i>Insig2</i>   | <i>Apaf1</i>    | <i>Gab1</i>   | <i>Pdgfrb</i>  |
| <i>Bmi1</i>     | <i>Itgav</i>    | <i>Bmi1</i>     | <i>Itgav</i>    | <i>Bmi1</i>     | <i>Itgav</i>    | <i>Bmi1</i>     | <i>Gabrb3</i> | <i>Pds5b</i>   |
| <i>Bmpr1a</i>   | <i>Itgb1</i>    | <i>Bmpr1a</i>   | <i>Itgb1</i>    | <i>Bmpr1a</i>   | <i>Itgb1</i>    | <i>Bmpr1a</i>   | <i>Gad2</i>   | <i>Phc1</i>    |
| <i>Cask</i>     | <i>Kcnj2</i>    | <i>Cask</i>     | <i>Kcnj2</i>    | <i>Cask</i>     | <i>Kcnj2</i>    | <i>Cask</i>     | <i>Glce</i>   | <i>Phc2</i>    |
| <i>Cdc42</i>    | <i>Kif3a</i>    | <i>Cdc42</i>    | <i>Kif3a</i>    | <i>Cdc42</i>    | <i>Kif3a</i>    | <i>Cdc42</i>    | <i>Grb2</i>   | <i>Piga</i>    |
| <i>Cdkn1c</i>   | <i>Lims1</i>    | <i>Cdkn1c</i>   | <i>Lims1</i>    | <i>Cdkn1c</i>   | <i>Lims1</i>    | <i>Cdkn1c</i>   | <i>Gsk3b</i>  | <i>Pkdcc</i>   |
| <i>Chd7</i>     | <i>Lrp6</i>     | <i>Chd7</i>     | <i>Lrp6</i>     | <i>Chd7</i>     | <i>Lrp6</i>     | <i>Chd7</i>     | <i>Hs2st1</i> | <i>Plekha1</i> |
| <i>Ctgf</i>     | <i>Luzp1</i>    | <i>Ctgf</i>     | <i>Luzp1</i>    | <i>Ctgf</i>     | <i>Luzp1</i>    | <i>Chrd</i>     | <i>Hspg2</i>  | <i>Ptpn11</i>  |
| <i>Cttnb1</i>   | <i>Mapk1</i>    | <i>Cttnb1</i>   | <i>Mapk1</i>    | <i>Cttnb1</i>   | <i>Mapk1</i>    | <i>Chuk</i>     | <i>Ick</i>    | <i>Ptprf</i>   |
| <i>Cttnbip1</i> | <i>Mdm4</i>     | <i>Cttnbip1</i> | <i>Mdm4</i>     | <i>Cttnbip1</i> | <i>Mdm4</i>     | <i>Col11a1</i>  | <i>Ifi88</i>  | <i>Rac1</i>    |
| <i>Dicer1</i>   | <i>Pdgfc</i>    | <i>Dicer1</i>   | <i>Pdgfc</i>    | <i>Dicer1</i>   | <i>Pdgfc</i>    | <i>Col2a1</i>   | <i>Igf2r</i>  | <i>Rad23b</i>  |
| <i>Dlg1</i>     | <i>Pdgfra</i>   | <i>Dlg1</i>     | <i>Pdgfra</i>   | <i>Dlg1</i>     | <i>Pdgfra</i>   | <i>Crk</i>      | <i>Inhbb</i>  | <i>Schip1</i>  |
| <i>Ednrb</i>    | <i>Pdgfrb</i>   | <i>Ednrb</i>    | <i>Pdgfrb</i>   | <i>Ednrb</i>    | <i>Pdgfrb</i>   | <i>Ctgf</i>     | <i>Insig1</i> | <i>Shh</i>     |
| <i>Efna5</i>    | <i>Pds5b</i>    | <i>Efna5</i>    | <i>Pds5b</i>    | <i>Efna5</i>    | <i>Pds5b</i>    | <i>Cttnb1</i>   | <i>Insig2</i> | <i>Slc12a5</i> |
| <i>Efnb1</i>    | <i>Phc1</i>     | <i>Efnb1</i>    | <i>Phc1</i>     | <i>Efnb1</i>    | <i>Phc1</i>     | <i>Cttnbip1</i> | <i>Itga5</i>  | <i>Slc32a1</i> |
| <i>Ephb2</i>    | <i>Piga</i>     | <i>Ephb2</i>    | <i>Piga</i>     | <i>Ephb2</i>    | <i>Piga</i>     | <i>Cyp26b1</i>  | <i>Itgav</i>  | <i>Smoc1</i>   |
| <i>Ephb3</i>    | <i>Plekha1</i>  | <i>Ephb3</i>    | <i>Plekha1</i>  | <i>Ephb3</i>    | <i>Plekha1</i>  | <i>Dicer1</i>   | <i>Itgb1</i>  | <i>Sos1</i>    |
| <i>Eya1</i>     | <i>Prickle1</i> | <i>Eya1</i>     | <i>Prickle1</i> | <i>Eya1</i>     | <i>Prickle1</i> | <i>Dlg1</i>     | <i>Itgb6</i>  | <i>Spry1</i>   |
| <i>Eya4</i>     | <i>Ptpn11</i>   | <i>Eya4</i>     | <i>Ptpn11</i>   | <i>Eya4</i>     | <i>Ptpn11</i>   | <i>Edn1</i>     | <i>Itgb8</i>  | <i>Tgfb2</i>   |
| <i>Fgf10</i>    | <i>Ptprf</i>    | <i>Fgf10</i>    | <i>Ptprf</i>    | <i>Fgf10</i>    | <i>Ptprf</i>    | <i>Ednrb</i>    | <i>Kcnj2</i>  | <i>Tgfr1</i>   |
| <i>Fgfr1</i>    | <i>Rac1</i>     | <i>Fgfr1</i>    | <i>Rac1</i>     | <i>Fgfr1</i>    | <i>Rac1</i>     | <i>Efna5</i>    | <i>Kif3a</i>  | <i>Tgfr2</i>   |
| <i>Fgfr2</i>    | <i>Rad23b</i>   | <i>Fgfr2</i>    | <i>Rad23b</i>   | <i>Fgfr2</i>    | <i>Rad23b</i>   | <i>Efnb1</i>    | <i>Lbr</i>    | <i>Tgfr3</i>   |
| <i>Fign</i>     | <i>Rspo2</i>    | <i>Fign</i>     | <i>Rspo2</i>    | <i>Fign</i>     | <i>Rspo2</i>    | <i>Ephb3</i>    | <i>Lims1</i>  | <i>Tiparp</i>  |
| <i>Fst</i>      | <i>Schip1</i>   | <i>Fst</i>      | <i>Schip1</i>   | <i>Fst</i>      | <i>Schip1</i>   | <i>Eya1</i>     | <i>Loxl3</i>  | <i>Trp63</i>   |
| <i>Fuz</i>      | <i>Slc12a5</i>  | <i>Fuz</i>      | <i>Slc12a5</i>  | <i>Fuz</i>      | <i>Slc12a5</i>  | <i>Eya4</i>     | <i>Lrp6</i>   | <i>Vcan</i>    |
| <i>Fzd2</i>     | <i>Sos1</i>     | <i>Fzd2</i>     | <i>Sos1</i>     | <i>Fzd2</i>     | <i>Sos1</i>     | <i>Fbxo11</i>   | <i>Luzp1</i>  | <i>Vegfa</i>   |
| <i>Fzd7</i>     | <i>Spry1</i>    | <i>Fzd7</i>     | <i>Spry1</i>    | <i>Fzd7</i>     | <i>Spry1</i>    | <i>Fgf10</i>    | <i>Mapk1</i>  | <i>Wls</i>     |
| <i>Gab1</i>     | <i>Tgfb2</i>    | <i>Gab1</i>     | <i>Tgfb2</i>    | <i>Gab1</i>     | <i>Tgfb2</i>    | <i>Fgf9</i>     | <i>Mapk3</i>  | <i>Wnt9b</i>   |
| <i>Gabrb3</i>   | <i>Tgfr1</i>    | <i>Gabrb3</i>   | <i>Tgfr1</i>    | <i>Gabrb3</i>   | <i>Tgfr1</i>    |                 |               |                |
| <i>Gad2</i>     | <i>Tgfr2</i>    | <i>Gad2</i>     | <i>Tgfr2</i>    | <i>Gad2</i>     | <i>Tgfr2</i>    |                 |               |                |
| <i>Glce</i>     | <i>Tgfr3</i>    | <i>Glce</i>     | <i>Tgfr3</i>    | <i>Glce</i>     | <i>Tgfr3</i>    |                 |               |                |
| <i>Grb2</i>     | <i>Tiparp</i>   | <i>Grb2</i>     | <i>Tiparp</i>   | <i>Grb2</i>     | <i>Tiparp</i>   |                 |               |                |
| <i>Gsk3b</i>    | <i>Vegfa</i>    | <i>Gsk3b</i>    | <i>Vegfa</i>    | <i>Gsk3b</i>    | <i>Vegfa</i>    |                 |               |                |

**Table S14.** Gene Ontology (GO) term enrichment analysis of overlapped genes using DAVID online tool.

| Category | GO term                                                                                                                    | Count | P-value  | FDR      |
|----------|----------------------------------------------------------------------------------------------------------------------------|-------|----------|----------|
| BP       | GO:0045893~positive regulation of transcription, DNA-templated                                                             | 17    | 3.33E-16 | 5.22E-13 |
| BP       | GO:0000122~negative regulation of transcription from RNA polymerase II promoter                                            | 16    | 3.13E-13 | 4.92E-10 |
| BP       | GO:0060325~face morphogenesis                                                                                              | 8     | 4.81E-13 | 7.57E-10 |
| BP       | GO:0060021~palate development                                                                                              | 9     | 1.63E-12 | 2.57E-09 |
| BP       | GO:0045944~positive regulation of transcription from RNA polymerase II promoter                                            | 17    | 1.64E-12 | 2.58E-09 |
| BP       | GO:0009887~organ morphogenesis                                                                                             | 9     | 1.25E-11 | 1.97E-08 |
| BP       | GO:0030326~embryonic limb morphogenesis                                                                                    | 8     | 1.39E-11 | 2.18E-08 |
| BP       | GO:0008285~negative regulation of cell proliferation                                                                       | 12    | 2.97E-11 | 4.67E-08 |
| BP       | GO:0042472~inner ear morphogenesis                                                                                         | 8     | 3.66E-11 | 5.75E-08 |
| BP       | GO:0007275~multicellular organism development                                                                              | 16    | 4.36E-11 | 6.85E-08 |
| BP       | GO:0050679~positive regulation of epithelial cell proliferation                                                            | 8     | 5.40E-11 | 8.49E-08 |
| BP       | GO:0008284~positive regulation of cell proliferation                                                                       | 13    | 6.09E-11 | 9.58E-08 |
| MF       | GO:0008083~growth factor activity                                                                                          | 9     | 1.26E-10 | 1.41E-07 |
| BP       | GO:0001843~neural tube closure                                                                                             | 8     | 3.10E-10 | 4.86E-07 |
| BP       | GO:0010628~positive regulation of gene expression                                                                          | 11    | 1.02E-09 | 1.61E-06 |
| BP       | GO:0042475~odontogenesis of dentin-containing tooth                                                                        | 7     | 1.18E-09 | 1.86E-06 |
| BP       | GO:0030324~lung development                                                                                                | 8     | 1.76E-09 | 2.76E-06 |
| BP       | GO:0001837~epithelial to mesenchymal transition                                                                            | 6     | 2.06E-09 | 3.23E-06 |
| BP       | GO:0045892~negative regulation of transcription, DNA-templated                                                             | 12    | 2.31E-09 | 3.63E-06 |
| BP       | GO:0048762~mesenchymal cell differentiation                                                                                | 5     | 2.64E-09 | 4.15E-06 |
| BP       | GO:0045165~cell fate commitment                                                                                            | 7     | 2.69E-09 | 4.23E-06 |
| BP       | GO:0002053~positive regulation of mesenchymal cell proliferation                                                           | 6     | 5.24E-09 | 8.23E-06 |
| BP       | GO:0030501~positive regulation of bone mineralization                                                                      | 6     | 5.24E-09 | 8.23E-06 |
| BP       | GO:0051216~cartilage development                                                                                           | 7     | 5.96E-09 | 9.36E-06 |
| BP       | GO:0030509~BMP signaling pathway                                                                                           | 7     | 8.54E-09 | 1.34E-05 |
| BP       | GO:0002062~chondrocyte differentiation                                                                                     | 6     | 1.63E-08 | 2.56E-05 |
| BP       | GO:0001657~ureteric bud development                                                                                        | 6     | 2.03E-08 | 3.19E-05 |
| MF       | GO:0001228~transcriptional activator activity, RNA polymerase II transcription regulatory region sequence-specific binding | 7     | 2.53E-08 | 2.83E-05 |
| BP       | GO:0001701~in utero embryonic development                                                                                  | 9     | 3.79E-08 | 5.96E-05 |
| BP       | GO:0030154~cell differentiation                                                                                            | 12    | 5.04E-08 | 7.92E-05 |
| BP       | GO:0042476~odontogenesis                                                                                                   | 5     | 1.38E-07 | 2.16E-04 |
| BP       | GO:0050680~negative regulation of epithelial cell proliferation                                                            | 6     | 1.61E-07 | 2.53E-04 |
| BP       | GO:0060395~SMAD protein signal transduction                                                                                | 6     | 2.26E-07 | 3.55E-04 |
| BP       | GO:0007507~heart development                                                                                               | 8     | 2.98E-07 | 4.68E-04 |
| BP       | GO:0040007~growth                                                                                                          | 5     | 4.57E-07 | 7.19E-04 |
| BP       | GO:0042060~wound healing                                                                                                   | 6     | 6.15E-07 | 9.66E-04 |
| BP       | GO:0048701~embryonic cranial skeleton morphogenesis                                                                        | 5     | 6.36E-07 | 1.00E-03 |
| BP       | GO:0007435~salivary gland morphogenesis                                                                                    | 4     | 8.23E-07 | 0.001293 |
| BP       | GO:0070374~positive regulation of ERK1 and ERK2 cascade                                                                    | 7     | 8.44E-07 | 0.001326 |
| BP       | GO:0008543~fibroblast growth factor receptor signaling pathway                                                             | 5     | 9.50E-07 | 0.001492 |
| BP       | GO:0043410~positive regulation of MAPK cascade                                                                             | 6     | 1.02E-06 | 0.001598 |
| MF       | GO:0005160~transforming growth factor beta receptor binding                                                                | 5     | 1.05E-06 | 0.00118  |
| BP       | GO:0051781~positive regulation of cell division                                                                            | 5     | 1.14E-06 | 0.001797 |
| BP       | GO:0001501~skeletal system development                                                                                     | 6     | 1.17E-06 | 0.00184  |
| BP       | GO:0001658~branching involved in ureteric bud morphogenesis                                                                | 5     | 1.49E-06 | 0.002338 |
| BP       | GO:0010862~positive regulation of pathway-restricted SMAD protein phosphorylation                                          | 5     | 1.49E-06 | 0.002338 |

|    |                                                                                    |    |          |          |
|----|------------------------------------------------------------------------------------|----|----------|----------|
| MF | GO:0003700~transcription factor activity, sequence-specific DNA binding            | 11 | 1.76E-06 | 0.00197  |
| BP | GO:0060445~branching involved in salivary gland morphogenesis                      | 4  | 2.26E-06 | 0.003548 |
| BP | GO:0003151~outflow tract morphogenesis                                             | 5  | 2.40E-06 | 0.003772 |
| MF | GO:0004714~transmembrane receptor protein tyrosine kinase activity                 | 5  | 2.42E-06 | 0.002715 |
| BP | GO:0061036~positive regulation of cartilage development                            | 4  | 2.78E-06 | 0.004362 |
| BP | GO:0007389~pattern specification process                                           | 5  | 3.20E-06 | 0.005036 |
| BP | GO:0060037~pharyngeal system development                                           | 4  | 4.03E-06 | 0.006341 |
| BP | GO:0071363~cellular response to growth factor stimulus                             | 5  | 4.76E-06 | 0.007486 |
| BP | GO:0042733~embryonic digit morphogenesis                                           | 5  | 5.39E-06 | 0.00847  |
| MF | GO:0008201~heparin binding                                                         | 6  | 6.44E-06 | 0.007214 |
| BP | GO:0006351~transcription, DNA-templated                                            | 14 | 8.49E-06 | 0.013347 |
| BP | GO:0090190~positive regulation of branching involved in ureteric bud morphogenesis | 4  | 8.70E-06 | 0.013678 |
| BP | GO:0090103~cochlea morphogenesis                                                   | 4  | 8.70E-06 | 0.013678 |
| BP | GO:0003148~outflow tract septum morphogenesis                                      | 4  | 9.94E-06 | 0.015613 |
| BP | GO:0042474~middle ear morphogenesis                                                | 4  | 9.94E-06 | 0.015613 |
| MF | GO:0043565~sequence-specific DNA binding                                           | 9  | 1.08E-05 | 0.012114 |
| BP | GO:0006355~regulation of transcription, DNA-templated                              | 15 | 1.25E-05 | 0.019677 |
| BP | GO:0001934~positive regulation of protein phosphorylation                          | 6  | 1.66E-05 | 0.026162 |
| BP | GO:0060686~negative regulation of prostatic bud formation                          | 3  | 1.82E-05 | 0.028543 |
| BP | GO:0001503~ossification                                                            | 5  | 2.39E-05 | 0.03761  |
| BP | GO:0030335~positive regulation of cell migration                                   | 6  | 2.67E-05 | 0.041973 |
| BP | GO:0060512~prostate gland morphogenesis                                            | 3  | 3.02E-05 | 0.047515 |
| BP | GO:0090090~negative regulation of canonical Wnt signaling pathway                  | 5  | 3.04E-05 | 0.047754 |
| BP | GO:0034504~protein localization to nucleus                                         | 4  | 3.17E-05 | 0.049817 |
| BP | GO:0071773~cellular response to BMP stimulus                                       | 4  | 3.17E-05 | 0.049817 |
| BP | GO:0045786~negative regulation of cell cycle                                       | 4  | 3.45E-05 | 0.05428  |
| MF | GO:0005125~cytokine activity                                                       | 6  | 3.47E-05 | 0.03889  |
| MF | GO:0003677~DNA binding                                                             | 13 | 3.93E-05 | 0.04404  |

BP: Biological Process. MF: Molecular Function.

FDR: False discovery rate.



**Table S15.** Primers for qRT-PCR.

| Species | Gene          | Forward sequence             | Reverse sequence            |
|---------|---------------|------------------------------|-----------------------------|
| Human   | <i>BMP2</i>   | 5'-ACTCGAAATCCCCGTGACC-3'    | 5'-CCACTCCACCACGAATCCA-3'   |
|         | <i>FGF9</i>   | 5'-GCTACAACGCTCCGCGA-3'      | 5'-TCCATTGGCTTAGAACGGGT-3'  |
|         | <i>PAX9</i>   | 5'-CCTGCTCTCGCAAGGAGAAA-3'   | 5'-AAGGAGCCTCACGGTTCAAG-3'  |
|         | <i>PDGFRA</i> | 5'-AAAAGCGAAGGCGCAATCTG-3'   | 5'-TCCGCAATGAATGTCCCACA-3'  |
|         | <i>GAPDH</i>  | 5'-GACAGCCAGCCGCATCTTCT-3'   | 5'-GCGCCAATACGACCAAATC-3'   |
| Mouse   | <i>Bmp2</i>   | 5'-GACCCGCTGTCTTCTAGTGT-3'   | 5'-ACGGCTTCTTCGTGATGGAA-3'  |
|         | <i>Fgf9</i>   | 5'-GTCGGATGGGATGAAGACCTTT-3' | 5'-TAATCGGCTGTTTCTCTGGCA-3' |
|         | <i>Pax9</i>   | 5'-ACCGTTCTGCACTCTGATG-3'    | 5'-GGGCAACACAAATGCCTCAT-3'  |
|         | <i>Pdgfra</i> | 5'-TCAGAGAGAATCGGCCCA-3'     | 5'-AGGACGAATTCAGCTGCACA-3'  |
|         | <i>Gapdh</i>  | 5'-AACTTTGGCATTGGAAGG-3'     | 5'-ACACATTGGTAGGAACA-3'     |
